# Supplementary material for: Base-promoted 1,6-conjugate addition of alkylazaarenes to para-quinone methides
Source: Royal Society of Chemistry journal article supplement (doi:10.1039/d0ob00419g), 2020-01-01

## Supporting Information

# Base-promoted 1,6-Conjugate Addition of Alkylazaarenes to *para*-Quinone Methides

Amritha Rayaroth, Rajat Kumar Singh, A. V. Kalyanakrishnan, Krishna Hari, Alagiri Kaliyamoorthy\*

School of Chemistry, Indian Institute of Science Education and Research  
Thiruvananthapuram, Kerala 695551, India  
\*Email: alagiri@iisertvm.ac.in

### Table of contents

|                                                                                     |     |
|-------------------------------------------------------------------------------------|-----|
| 1. General information.....                                                         | S2  |
| 2. General Procedure for Synthesis of Compounds <b>1h</b> , <b>1o</b> .....         | S2  |
| 3. General Procedure for Synthesis of Compounds <b>3aa-3ka</b> .....                | S2  |
| 4. Procedure for the Direct Synthesis of Compound <b>3aa</b> .....                  | S3  |
| 5. Lewis acid Screening.....                                                        | S4  |
| 6. Characterization data for Compounds <b>1h</b> , <b>1o</b> , <b>3aa-3ka</b> ..... | S5  |
| 7. General Procedure for Synthesis of Compound <b>4a</b> .....                      | S18 |
| 8. Characterization data for Compounds <b>4a</b> .....                              | S18 |
| 9. Crystal data for Compound <b>3aa</b> .....                                       | S20 |
| 10. References.....                                                                 | S21 |
| 11. <sup>1</sup> H and <sup>13</sup> C spectra.....                                 | S22 |

## General information

All reactions were conducted under nitrogen atmosphere using flame dried glassware. All solvents and reagents were obtained from commercial sources and distilled prior to use. Literature procedures were followed for the synthesis of *para*-Quinone Methides **1a-1g**, **1i-1n**, **1p-1r**.<sup>1-6</sup> Merck silica gel aluminium plates with F-254 indicator was used to perform analytical thin layer chromatography (TLC) and examined under UV light. Flash chromatography was performed on Merck silica gel 230-400 mesh using ethyl acetate (EtOAc) and pet ether as eluents. <sup>1</sup>H and <sup>13</sup>C NMR were recorded in CDCl<sub>3</sub> on Bruker spectrometer (500 and 125 MHz respectively) using tetramethylsilane as the internal standard. Melting points were not corrected and determined by using a Stuart Melting Point SMP50 apparatus. FT-IR spectra were recorded using IR Prestige-21 SHIMADZU instrument using a KBr disc or pellet. HRMS was recorded using Thermo Scientific Q Exactive TM Bench top LC-HRMS instrument. The crystal structure was determined using Bruker Axs Kappa Apex II ScXRD instrument.

## General Procedure for the Synthesis of Compounds **1h** and **1o**

In a Dean-Stark apparatus, a solution of 2,6-di-*tert*-butylphenol (1 equiv) and the corresponding aldehyde (1 equiv) in toluene (5 mL) was heated to reflux. Piperidine (2 equiv) was added dropwise, and then, the reaction mixture was continued to reflux for 12 h. After cooling just below the boiling point of the reaction mixture, acetic anhydride (2 equiv) was added, and stirring was continued for 30 min. Then, the reaction mixture was poured on ice-water and extracted with CH<sub>2</sub>Cl<sub>2</sub> (3 x 50 mL). The combined organic phases were dried over anhydrous Na<sub>2</sub>SO<sub>4</sub>, and concentrated under vacuum. The crude product was isolated by silica gel column chromatography using Pet ether/EtOAc (99:1) to obtain the desired the product.

## General Procedure for the Synthesis of Compounds **3aa-3ka** using NaN(SiMe<sub>3</sub>)<sub>2</sub>

To a flame-dried test tube equipped with a magnetic stirring bar, NaN(SiMe<sub>3</sub>)<sub>2</sub> (2 equiv) and 1,4-dioxane (0.5 mL) was added at room temperature. To this solution, alkylazaarene (3 equiv) was added dropwise under nitrogen. After 5 minutes of stirring, *para*-quinone methide (30 mg, 1 equiv) dissolved in 1,4-dioxane (0.5 mL) was added and stirring was continued for 1 h. The progress of the reaction was monitored by TLC. Finally, the reaction mixture was quenched with water and extracted with ethyl acetate (3 x 20 mL). The organic phase was washed with brine, dried over anhydrous Na<sub>2</sub>SO<sub>4</sub>, and concentrated under reduced pressure. The crude product was purified by silica gel flash column chromatography using Pet ether/EtOAc (10:1) to obtain the desired product.

### General Procedure for the Synthesis of Compounds 3ea-3fa using KN(SiMe<sub>3</sub>)<sub>2</sub>

To a flame-dried test tube equipped with a magnetic stirring bar, alkylzaarene (3 equiv) and 1,4-dioxane (0.5 mL) was added at room temperature. To this solution, KN(SiMe<sub>3</sub>)<sub>2</sub> (2 equiv) was added under nitrogen. After 5 minutes of stirring, *p*-QMs (30 mg, 1 equiv) dissolved in 1,4-dioxane (0.5 mL) was added and stirring was continued for 1 h. Progress of the reaction was monitored by TLC. Finally, the reaction mixture was quenched with water and extracted with ethyl acetate (3 x 20 mL). The organic phase was washed with brine, dried over anhydrous Na<sub>2</sub>SO<sub>4</sub>, and concentrated under reduced pressure. The crude product was purified by flash column chromatography using silica gel to obtain the desired product.

### Procedure for the Direct Synthesis of Compound 3aa<sup>7</sup>

In a Dean-Stark apparatus, a solution of 2,6-di-*tert*-butylphenol (58.3 mg, 1 equiv) and the benzaldehyde (30 mg, 1 equiv) in toluene (1 mL) was heated to reflux. Piperidine (55.9 μL, 2 equiv) was added dropwise. The reaction mixture was continued to reflux for 12 h. After cooling just below the boiling point, acetic anhydride (53.4 μL, 2 equiv) was added to the reaction mixture, and stirred for 1 h. Then, the reaction mixture was azeotropically concentrated with toluene and CH<sub>2</sub>Cl<sub>2</sub> under reduced pressure. To the concentrated mixture, NaN(SiMe<sub>3</sub>)<sub>2</sub> (103.7 mg, 2 equiv) and 1,4-dioxane (2.8 mL, 0.1 M) was added. To the stirring solution, 2-methylpyridine (0.08 mL, 3 equiv) was added drop wise and stirred for 1 h. The reaction mixture was quenched with water and extracted with EtOAc (3 x 20 mL). The crude product was isolated by flash column chromatography using petroleum ether and ethyl acetate and afforded the desired product as a white solid in 56% yield (60.9 mg).

### Lewis acid Screening

**Experimental Procedure:** To a flame-dried test tube equipped with a magnetic stirring bar, catalyst (20 mol%), ligand (20 mol%), and DMF (0.5 mL) was added at room temperature and stirred for 5 min. To this solution, 2-methylpyridine (50.3 μL, 5 equiv) was added under nitrogen. After 5 minutes of stirring, *p*-QM (30 mg, 1 equiv) dissolved in DMF (0.5 mL) was added and stirring was continued for 24 h at 120 °C. The reaction was monitored by TLC.

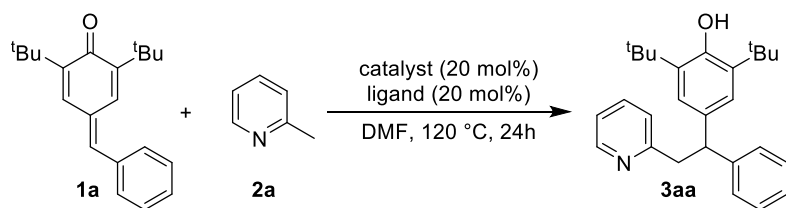

| entry          | catalyst             | ligand              | yield (%) |
|----------------|----------------------|---------------------|-----------|
| 1              | Sc(OTf) <sub>3</sub> | -                   | n.r       |
| 2              | Yb(OTf) <sub>3</sub> | -                   | n.r       |
| 3              | La(OTf) <sub>3</sub> | -                   | n.r       |
| 4              | Mg(OTf) <sub>2</sub> | -                   | n.r       |
| 5              | Zn(OTf) <sub>2</sub> | -                   | n.r       |
| 6 <sup>a</sup> | Cu(OTf) <sub>2</sub> | 1,10-phenanthroline | n.r       |
| 7 <sup>a</sup> | Pd(OAc) <sub>2</sub> | 1,10-phenanthroline | n.r       |

<sup>a</sup>Toluene was used as the solvent. nr = no reaction.

### Typical experimental procedure for the 1,6-conjugate addition reaction in the presence of a in situ generated sodium aryloxide base

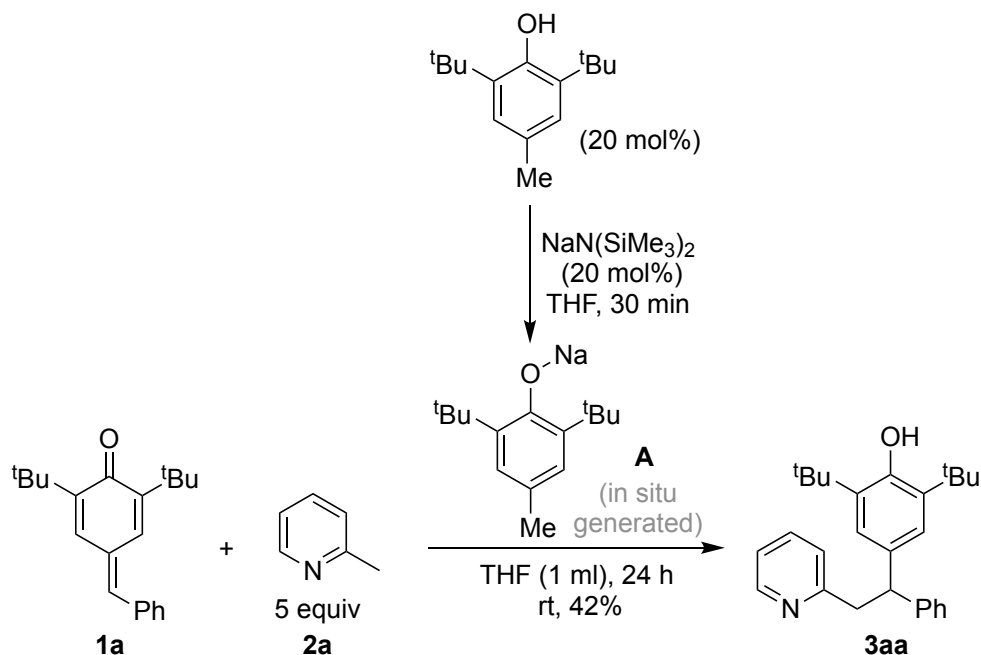

To a flame-dried test tube equipped with a magnetic stirring bar,  $\text{NaN}(\text{SiMe}_3)_2$  (0.2 equiv), 2,6-di-*tert*-butyl-4-methylphenol (0.2 equiv) and THF (0.5 mL) was added at room temperature and stirred for 15 minutes. To this solution, 2-methylpyridine (5 equiv) was added dropwise under nitrogen. After 1 hour of stirring, *para*-quinone methide (30 mg, 1 equiv) dissolved in THF (0.5 mL) was added and stirring was continued for 24 h. Finally, the reaction mixture was

quenched with water and extracted with ethyl acetate (3 x 20 mL). The combined organic phase was washed with brine, dried over anhydrous Na<sub>2</sub>SO<sub>4</sub>, and concentrated under reduced pressure. The crude product was purified by silica gel flash column chromatography using petroleum ether/EtOAc (10:1) to obtain the desired product **3aa** (16.5 mg, 42%).

### Characterization data

4-(4-(allyloxy)benzylidene)-2,6-di-*tert*-butylcyclohexa-2,5-dien-1-one (**1h**).

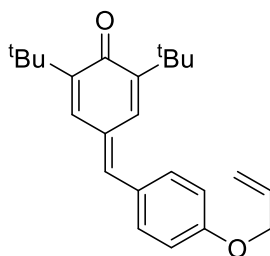

Orange gummy liquid (1.46 g, 75%, 900 mg of aldehyde was used). <sup>1</sup>H NMR (500 MHz, CDCl<sub>3</sub>): δ (ppm) 7.55 (d, *J* = 2.3 Hz, 1H), 7.43 (d, *J* = 8.7 Hz, 2H), 7.13 (s, 1H), 7.00-6.99 (m, 3H), 6.11-6.04 (m, 1H), 5.45 (dd, *J* = 17.3, 1.5 Hz, 1H), 5.33 (dd, *J* = 10.5, 1.2 Hz, 1H), 4.61 (d, *J* = 5.3 Hz, 2H), 1.33 (s, 9H), 1.32 (s, 9H). <sup>13</sup>C NMR (120 MHz, CDCl<sub>3</sub>): δ (ppm) 186.5, 159.6, 149.0, 147.2, 142.6, 135.4, 132.7, 132.2, 130.6, 128.8, 127.8, 118.1, 115.2, 68.9, 35.4, 34.9, 29.6, 29.5. IR (FT IR, cm<sup>-1</sup>): 3447, 2955, 1599, 1506, 1256, 1175, 1020, 823. HRMS (*m/z*): calculated for C<sub>24</sub>H<sub>30</sub>O<sub>2</sub> [M + H], 351.2318; found 351.2314.

4-((1-benzyl-1*H*-indol-3-yl)methylene)-2,6-di-*tert*-butylcyclohexa-2,5-dien-1-one (**1o**).

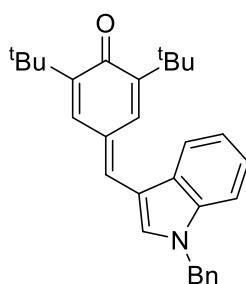

Orange solid (533 mg, 52%, 500 mg of 2,6-di-*tert*-butylphenol was used); mp, 130.5-133.4 °C. <sup>1</sup>H NMR (500 MHz, CDCl<sub>3</sub>): δ (ppm) 7.82 (d, *J* = 7.3 Hz, 1H), 7.61 (d, *J* = 2.4 Hz, 1H), 7.46 (s, 1H), 7.41-7.24 (m, 9H), 7.11 (d, *J* = 2.4 Hz, 1H), 5.38 (s, 2H), 1.35 (s, 9H), 1.29 (s, 9H). <sup>13</sup>C NMR (120 MHz, CDCl<sub>3</sub>): δ (ppm) 186.4, 148.0, 146.1, 136.7, 135.6, 135.3, 134.5, 130.6, 129.2, 128.40, 128.38, 128.33, 128.1, 127.6, 123.5, 121.5, 119.3, 113.3, 110.3, 50.8, 35.4, 34.9,

29.6, 29.58. IR (FT IR,  $\text{cm}^{-1}$ ): 2951, 1601, 1545, 1510, 1352, 1175, 943, 745. HRMS ( $m/z$ ): calculated for  $\text{C}_{30}\text{H}_{33}\text{NO}$  [ $\text{M} + \text{H}$ ], 424.2634; found 424.2634.

*2,6-di-tert-butyl-4-(1-phenyl-2-(pyridin-2-yl)ethyl)phenol (3aa)*.

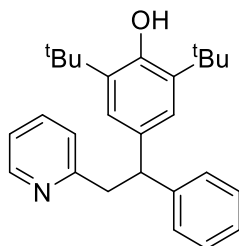

White solid (36 mg, 91%); mp, 160.4-167.1 °C. Recrystallised from  $\text{CHCl}_3$ /hexane.  $^1\text{H}$  NMR (500 MHz,  $\text{CDCl}_3$ ):  $\delta$  (ppm) 8.51 (d,  $J = 4.1$  Hz, 1H), 7.40 (td,  $J = 7.6, 1.8$  Hz, 1H), 7.25-7.21 (m, 4H), 7.14-7.11 (m, 1H), 7.03-7.00 (m, 1H), 6.98 (s, 2H), 6.83 (d,  $J = 7.8$  Hz, 1H), 5.00 (s, 1H), 4.49 (t,  $J = 8.0$  Hz, 1H), 3.52-3.41 (m, 2H), 1.36 (s, 18H).  $^{13}\text{C}$  NMR (125 MHz,  $\text{CDCl}_3$ ):  $\delta$  (ppm) 160.4, 151.9, 149.1, 144.5, 135.8, 135.4, 134.9, 128.2, 128.1, 125.9, 124.5, 123.9, 120.9, 51.2, 45.2, 34.3, 30.3. IR (FT IR,  $\text{cm}^{-1}$ ): 3312, 2957, 1595, 1435, 1097, 700, 469. HRMS ( $m/z$ ): calculated for  $\text{C}_{27}\text{H}_{33}\text{NO}$  [ $\text{M} + \text{H}$ ], 388.2634; found: 388.2626.

*2,6-di-tert-butyl-4-(1-(naphthalen-1-yl)-2-(pyridin-2-yl)ethyl)phenol (3ab)*.

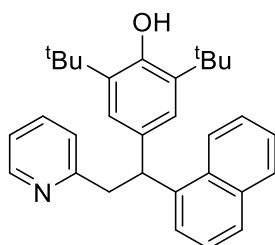

Brown solid (36.8 mg, 97%); mp, 159.6-163.6 °C.  $^1\text{H}$  NMR (500 MHz,  $\text{CDCl}_3$ ):  $\delta$  (ppm) 8.52 (d,  $J = 4.7$  Hz, 1H), 8.21 (d,  $J = 9.0$  Hz, 1H), 7.81-7.79 (m, 1H), 7.69 (d,  $J = 8.2$  Hz, 1H), 7.57 (d,  $J = 7.1$  Hz, 1H), 7.46-7.35 (m, 4H), 7.01-6.99 (m, 1H), 6.97 (s, 2H), 6.82 (d,  $J = 7.8$  Hz, 1H), 5.34 (t,  $J = 7.8$  Hz, 1H), 4.95 (s, 1H), 3.66-3.62 (m, 1H), 3.55-3.50 (m, 1H), 1.31 (s, 18H).  $^{13}\text{C}$  NMR (125 MHz,  $\text{CDCl}_3$ ):  $\delta$  (ppm) 160.5, 151.9, 149.2, 140.4, 135.8, 135.4, 134.4, 133.9, 132.0, 128.6, 126.8, 125.7, 125.3, 125.2, 124.7, 124.4, 124.2, 123.9, 120.9, 46.0, 45.4, 34.3, 30.3. IR (FT IR,  $\text{cm}^{-1}$ ): 3377, 2953, 1595, 1433, 1190, 777. HRMS ( $m/z$ ): calculated for  $\text{C}_{31}\text{H}_{35}\text{NO}$  [ $\text{M} + \text{H}$ ], 438.2791; found: 438.2783.

*4-(1-([1,1'-biphenyl]-4-yl)-2-(pyridin-2-yl)ethyl)-2,6-di-tert-butylphenol (3ac)*.

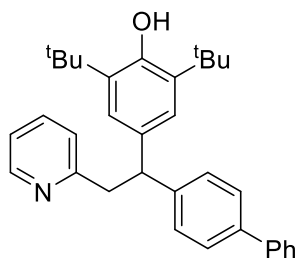

Brown gummy oil (34.5 mg, 92%).  $^1\text{H}$  NMR (500 MHz,  $\text{CDCl}_3$ ):  $\delta$  (ppm) 8.57 (d,  $J = 4.7$  Hz, 1H), 7.56 (d,  $J = 7.7$  Hz, 2H), 7.48-7.44 (m, 3H), 7.42-7.38 (m, 2H), 7.34-7.29 (m, 3H), 7.08-7.05 (m, 1H), 7.02 (s, 2H), 6.88 (d,  $J = 7.8$  Hz, 1H), 5.02 (s, 1H), 4.54 (t,  $J = 8$  Hz, 1H), 3.59-3.46 (m, 2H), 1.37 (s, 18 H).  $^{13}\text{C}$  NMR (125 MHz,  $\text{CDCl}_3$ ):  $\delta$  (ppm) 159.9, 152.1, 148.6, 143.5, 140.9, 138.7, 136.5, 135.6, 134.6, 128.7, 128.5, 127.0, 126.9, 124.5, 124.2, 121.2, 50.9, 44.7, 34.4, 30.3. IR (FT IR,  $\text{cm}^{-1}$ ): 3635, 2954, 1593, 1487, 1433, 1234, 763, 689. HRMS (m/z): calculated for  $\text{C}_{33}\text{H}_{37}\text{NO}$  [ $\text{M} + \text{H}$ ], 464.2947; found: 464.2944.

*2,6-di-tert-butyl-4-(2-(pyridin-2-yl)-1-(o-tolyl)ethyl)phenol (3ad).*

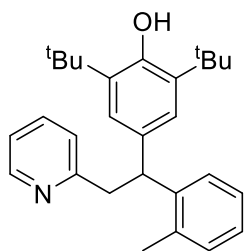

Yellow solid (37.2 mg, 95%); mp, 136.4-139.4  $^{\circ}\text{C}$ .  $^1\text{H}$  NMR (500 MHz,  $\text{CDCl}_3$ ):  $\delta$  (ppm) 8.52 (d,  $J = 4.5$  Hz, 1H), 7.44 (d,  $J = 7.7$  Hz, 1H), 7.41-7.38 (m, 1H), 7.19-7.17 (m, 1H), 7.07-7.01 (m, 3H), 6.89 (s, 2H), 6.77 (d,  $J = 7.8$  Hz, 1H), 4.97 (s, 1H), 4.67 (t,  $J = 7.9$  Hz, 1H), 3.50-3.39 (m, 2H), 2.19 (s, 3H), 1.33 (s, 18 H).  $^{13}\text{C}$  NMR (125 MHz,  $\text{CDCl}_3$ ):  $\delta$  (ppm) 160.5, 151.8, 149.0, 142.4, 136.4, 135.8, 135.3, 134.3, 130.3, 126.7, 125.82, 125.77, 124.7, 123.9, 120.9, 46.7, 45.2, 34.3, 30.3, 19.9. IR (FT IR,  $\text{cm}^{-1}$ ): 3377, 2953, 1595, 1433, 1193, 1002, 754. HRMS (m/z): calculated for  $\text{C}_{28}\text{H}_{35}\text{NO}$  [ $\text{M} + \text{H}$ ], 402.2791; found: 402.2784.

*2,6-di-tert-butyl-4-(2-(pyridin-2-yl)-1-(p-tolyl)ethyl)phenol (3ae).*

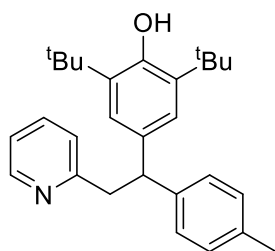

Yellow solid (35.9 mg, 92%); mp, 112.6-116.4 °C. <sup>1</sup>H NMR (500 MHz, CDCl<sub>3</sub>): δ (ppm) 8.53 (d, *J* = 4.1 Hz, 1H), 7.45-7.42 (m, 1H), 7.14 (d, *J* = 7.7 Hz, 2H), 7.06-7.02 (m, 3H), 6.98 (s, 2H), 6.86 (d, *J* = 7.8 Hz, 1H), 4.99 (s, 1H), 4.45 (t, *J* = 8 Hz, 1H), 3.53-3.41 (m, 2H), 2.27 (s, 3H), 1.36 (s, 18H). <sup>13</sup>C NMR (125 MHz, CDCl<sub>3</sub>): δ (ppm) 160.2, 151.9, 148.6, 141.3, 136.3, 135.45, 135.38, 134.9, 128.9, 127.9, 124.5, 124.1, 121.1, 50.8, 44.8, 34.3, 30.3, 21.0. IR (FT IR, cm<sup>-1</sup>): 3435, 2957, 1595, 1435, 1197, 815, 617. HRMS (m/z): calculated for C<sub>28</sub>H<sub>35</sub>NO [M + H], 402.2791; found 402.2787.

*2,6-di-tert-butyl-4-(1-(4-methoxyphenyl)-2-(pyridin-2-yl)ethyl)phenol (3af)*.

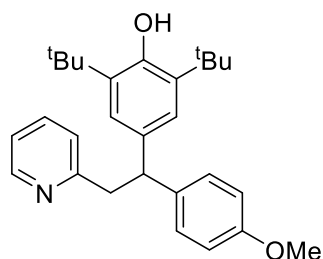

Yellowish brown solid (36.7 mg, 95%); mp, 120.5-123.4 °C. <sup>1</sup>H NMR (500 MHz, CDCl<sub>3</sub>): δ (ppm) 8.53 (d, *J* = 4.2 Hz, 1H), 7.46-7.43 (m, 1H), 7.16 (d, *J* = 8.5 Hz, 2H), 7.07-7.05 (m, 1H), 6.97 (s, 2H), 6.85 (d, *J* = 7.8 Hz, 1H), 6.77 (d, *J* = 8.7 Hz, 2H), 4.99 (s, 1H), 4.44 (t, *J* = 8.0 Hz, 1H), 3.75 (s, 3H), 3.50-3.40 (m, 2H), 1.36 (s, 18H). <sup>13</sup>C NMR (125 MHz, CDCl<sub>3</sub>): δ (ppm) 160.5, 157.7, 151.9, 149.1, 136.6, 135.9, 135.4, 135.3, 128.9, 124.4, 123.9, 120.9, 113.6, 55.2, 50.4, 45.4, 34.3, 30.3. IR (FT IR, cm<sup>-1</sup>): 3437, 2957, 1591, 1512, 1435, 1246, 1184, 1115, 1038, 770. HRMS (m/z): calculated for C<sub>28</sub>H<sub>35</sub>NO<sub>2</sub> [M + H], 418.2740; found: 418.2731.

*2,6-di-tert-butyl-4-(1-(3,4-dimethoxyphenyl)-2-(pyridin-2-yl)ethyl)phenol (3ag)*.

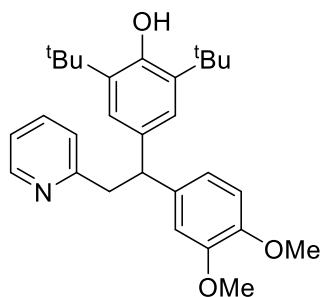

Yellow gummy oil (26.5 mg, 70%). <sup>1</sup>H NMR (500 MHz, CDCl<sub>3</sub>): δ (ppm) 8.52 (d, *J* = 4.0 Hz, 1H), 7.43-7.40 (m, 1H), 7.04-7.02 (m, 1H), 6.99 (s, 2H), 6.83 (d, *J* = 7.7 Hz, 1H), 6.79-6.74 (m, 3H), 5.01 (s, 1H), 4.43 (t, *J* = 8.0 Hz, 1H), 3.82 (s, 3H), 3.78 (s, 3H), 3.46-3.38 (m, 2H), 1.37 (s, 18H). <sup>13</sup>C NMR (125 MHz, CDCl<sub>3</sub>): δ (ppm) 160.4, 151.9, 149.1, 148.5, 147.1, 137.1,



135.9, 135.5, 134.9, 124.4, 123.9, 120.9, 119.9, 111.8, 110.9, 55.80, 55.75, 50.8, 45.5, 34.4, 30.3. IR (FT IR,  $\text{cm}^{-1}$ ): 3638, 2955, 1514, 1436, 1261, 1028, 768. HRMS ( $m/z$ ): calculated for  $\text{C}_{29}\text{H}_{37}\text{NO}_3$  [ $\text{M} + \text{H}$ ], 448.2846; found: 448.2843.

*4-(1-(4-(allyloxy)phenyl)-2-(pyridin-2-yl)ethyl)-2,6-di-tert-butylphenol (3ah).*

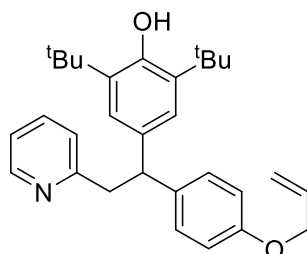

Brown solid (32.5 mg, 86%); mp, 107.7-109.4 °C.  $^1\text{H}$  NMR (500 MHz,  $\text{CDCl}_3$ ):  $\delta$  (ppm) 8.52 (d,  $J = 4.2$  Hz, 1H), 7.42-7.39 (m, 1H), 7.14 (d,  $J = 8.3$  Hz, 2H), 7.04-7.01 (m, 1H), 6.96 (s, 2H), 6.82 (d,  $J = 7.7$  Hz, 1H), 6.78 (d,  $J = 8.4$  Hz, 2H), 6.07-5.99 (m, 1H), 5.38 (d,  $J = 17.2$  Hz, 1H), 5.25 (d,  $J = 10.3$  Hz, 1H), 4.99 (s, 1H), 4.47 (d,  $J = 5.0$  Hz, 2H), 4.43 (t,  $J = 8$  Hz, 1H), 3.48-3.37 (m, 2H), 1.36 (s, 18H).  $^{13}\text{C}$  NMR (125 MHz,  $\text{CDCl}_3$ ):  $\delta$  (ppm) 160.5, 156.8, 151.9, 149.1, 136.8, 135.8, 135.4, 135.2, 133.5, 129.0, 124.4, 123.9, 120.9, 117.5, 114.4, 68.8, 50.4, 45.4, 34.3, 30.3. IR (FT IR,  $\text{cm}^{-1}$ ): 3638, 2954, 1589, 1510, 1433, 1228, 991, 826. HRMS ( $m/z$ ): calculated for  $\text{C}_{30}\text{H}_{37}\text{NO}_2$  [ $\text{M} + \text{H}$ ], 444.2897; found: 444.2894.

*4-(1-(4-(benzyloxy)phenyl)-2-(pyridin-2-yl)ethyl)-2,6-di-tert-butylphenol (3ai).*

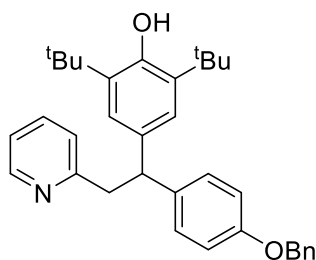

Yellowish brown solid (27.6 mg, 75%); mp, 122.6-125.7 °C.  $^1\text{H}$  NMR (500 MHz,  $\text{CDCl}_3$ ):  $\delta$  (ppm) 8.52 (d,  $J = 4.0$  Hz, 1H), 7.43-7.40 (m, 3H), 7.38-7.35 (m, 2H), 7.32-7.29 (m, 1H), 7.16 (d,  $J = 8.3$  Hz, 2H), 7.04-7.02 (m, 1H), 6.96 (s, 2H), 6.85-6.82 (m, 3H), 5.00 (s, 3H), 4.44 (t,  $J = 8.0$  Hz, 1H), 3.48-3.38 (m, 2H), 1.36 (s, 18H).  $^{13}\text{C}$  NMR (125 MHz,  $\text{CDCl}_3$ ):  $\delta$  (ppm) 160.4, 157.0, 151.9, 148.9, 137.2, 136.9, 135.9, 135.4, 135.2, 129.0, 128.5, 127.9, 127.5, 124.4, 123.9, 120.9, 114.6, 69.9, 50.4, 45.2, 34.3, 30.3. IR (FT IR,  $\text{cm}^{-1}$ ): 3638, 2955, 1510, 1435, 1246, 1042, 737. HRMS ( $m/z$ ): calculated for  $\text{C}_{34}\text{H}_{39}\text{NO}_2$  [ $\text{M} + \text{H}$ ], 494.3053; found: 494.3051.

*2,6-di-tert-butyl-4-(1-(4-fluorophenyl)-2-(pyridin-2-yl)ethyl)phenol (3aj).*

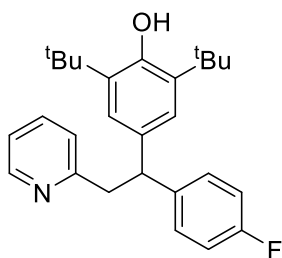

Yellow solid (34.3 mg, 88%); mp, 145.9-149.2 °C.  $^1\text{H}$  NMR (500 MHz,  $\text{CDCl}_3$ ):  $\delta$  (ppm) 8.54 (d,  $J = 4.4$  Hz, 1H), 7.46-7.43 (m, 1H), 7.20-7.18 (m, 2H), 7.07-7.05 (m, 1H), 6.95 (s, 2H), 6.92-6.89 (m, 2H), 6.84 (d,  $J = 7.8$  Hz, 1H), 5.03 (s, 1H), 4.50 (t,  $J = 8.0$  Hz, 1H), 3.49-3.40 (m, 2H), 1.36 (s, 18H).  $^{13}\text{C}$  NMR (125 MHz,  $\text{CDCl}_3$ ):  $\delta$  (ppm) 162.2, 160.3, 159.9, 152.1, 148.8, 140.0 (d,  $J = 3$  Hz), 136.3, 135.6, 134.6, 129.5 (d,  $J = 7.6$ ), 124.4, 124.1, 121.2, 115.0, 114.9, 50.3, 44.9, 34.4, 30.3.  $^{19}\text{F}$  NMR (470 MHz,  $\text{CDCl}_3$ ):  $\delta$  (ppm) -117.49. IR (FT IR,  $\text{cm}^{-1}$ ): 3442, 2957, 1595, 1508, 1435, 1228, 1097, 835. HRMS ( $m/z$ ): calculated for  $\text{C}_{27}\text{H}_{32}\text{FNO}$  [ $\text{M} + \text{H}$ ], 406.2540; found: 406.2535.

*2,6-di-tert-butyl-4-(1-(2-chlorophenyl)-2-(pyridin-2-yl)ethyl)phenol (3ak)*.

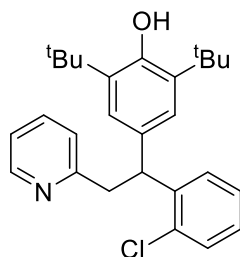

Off-white solid (37.2 mg, 97%); mp, 127.6-132.8 °C.  $^1\text{H}$  NMR (500 MHz,  $\text{CDCl}_3$ ):  $\delta$  (ppm) 8.49 (d,  $J = 4.6$  Hz, 1H), 7.45-7.42 (m, 2H), 7.27 (s, 1H), 7.22-7.19 (m, 1H), 7.08-7.01 (m, 4H), 6.94 (d,  $J = 7.8$  Hz, 1H), 5.05 (t,  $J = 8.1$  Hz, 1H), 5.02 (s, 1H), 3.56-3.46 (m, 2H), 1.36 (s, 18H).  $^{13}\text{C}$  NMR (125 MHz,  $\text{CDCl}_3$ ):  $\delta$  (ppm) 159.9, 152.1, 149.1, 141.9, 135.9, 135.4, 134.2, 133.4, 129.6, 128.7, 127.2, 126.7, 124.7, 123.4, 121.1, 46.4, 44.2, 34.3, 30.3. IR (FT IR,  $\text{cm}^{-1}$ ): 2957, 1595, 1477, 1435, 1192, 754. HRMS ( $m/z$ ): calculated for  $\text{C}_{27}\text{H}_{32}\text{ClNO}$  [ $\text{M} + \text{H}$ ], 422.2245; found: 422.2240.

*2,6-di-tert-butyl-4-(1-(4-chlorophenyl)-2-(pyridin-2-yl)ethyl)phenol (3al)*.

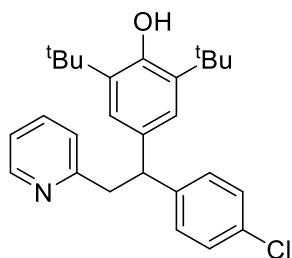

Off-white solid (35.1 mg, 91%); mp, 122.8-126.6 °C. <sup>1</sup>H NMR (500 MHz, CDCl<sub>3</sub>): δ (ppm) 8.52 (d, *J* = 4.2 Hz, 1H), 7.45-7.42 (m, 1H), 7.19-7.15 (m, 4H), 7.06-7.03 (m, 1 H), 6.95 (s, 2 H), 6.83 (d, *J* = 7.8 Hz, 1H), 5.03 (s, 1H), 4.48 (t, *J* = 8.0 Hz, 1H), 3.47-3.39 (m, 2H), 1.36 (s, 18H). <sup>13</sup>C NMR (125 MHz, CDCl<sub>3</sub>): δ (ppm) 159.9, 152.1, 149.1, 142.9, 136.1, 135.6, 134.4, 131.6, 129.5, 128.3, 124.4, 123.9, 121.2, 50.5, 44.8, 34.4, 30.3. IR (FT IR, cm<sup>-1</sup>): 3362, 2957, 1595, 1487, 1435, 1094, 1009, 625. HRMS (*m/z*): calculated for C<sub>27</sub>H<sub>32</sub>ClNO [M + H], 422.2245; found: 422.2242.

4-(1-(4-bromophenyl)-2-(pyridin-2-yl)ethyl)-2,6-di-tert-butylphenol (**3am**).

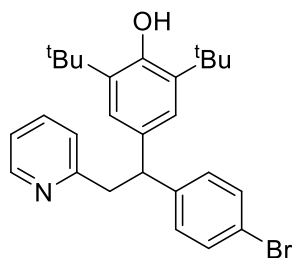

Yellow solid (28.6 mg, 76%); mp, 116.4-120.4 °C. <sup>1</sup>H NMR (500 MHz, CDCl<sub>3</sub>): δ (ppm) 8.56 (d, *J* = 3.9 Hz, 1H), 7.49-7.47 (m, 1H), 7.33 (d, *J* = 8.0 Hz, 2H), 7.12-7.07 (m, 3 H), 6.95 (s, 2 H), 6.86 (d, *J* = 7.8 Hz, 1H), 5.04 (s, 1H), 4.48 (t, *J* = 8.0 Hz, 1H), 3.51-3.41 (m, 2H), 1.36 (s, 18H). <sup>13</sup>C NMR (125 MHz, CDCl<sub>3</sub>): δ (ppm) 159.5, 152.2, 148.5, 143.3, 136.8, 135.7, 134.0, 131.3, 129.9, 124.4, 124.2, 121.4, 119.8, 50.5, 44.3, 34.4, 30.3. IR (FT IR, cm<sup>-1</sup>): 3298, 2957, 1595, 1485, 1435, 1115, 1007, 810, 758. HRMS (*m/z*): calculated for C<sub>27</sub>H<sub>32</sub>BrNO [M + H], 466.1740; found: 466.1738.

4-(1-(3,5-di-tert-butyl-4-hydroxyphenyl)-2-(pyridin-2-yl)ethyl)benzonitrile (**3an**).

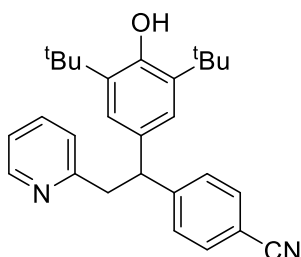

Yellow gummy oil (20.5 mg, 53%).  $^1\text{H}$  NMR (500 MHz,  $\text{CDCl}_3$ ):  $\delta$  (ppm) 8.51 (d,  $J = 3.9$  Hz, 1H), 7.51 (d,  $J = 8.3$  Hz, 2H), 7.44 (td,  $J = 7.6, 1.7$  Hz, 1H), 7.33 (d,  $J = 8.2$  Hz, 2H), 7.07-7.04 (m, 1H), 6.93 (s, 2H), 6.84 (d,  $J = 7.7$  Hz, 1H), 5.07 (s, 1H), 4.59 (t,  $J = 8.0$  Hz, 1H), 3.46 (d,  $J = 8$  Hz, 2H) 1.36 (s, 18H).  $^{13}\text{C}$  NMR (125 MHz,  $\text{CDCl}_3$ ):  $\delta$  (ppm) 159.4, 152.4, 150.2, 149.2, 136.1, 135.9, 133.4, 132.1, 128.9, 124.4, 123.9, 121.3, 119.1, 109.8, 51.1, 44.4, 34.4, 30.3. IR (FT IR,  $\text{cm}^{-1}$ ): 3427, 2951, 2361, 1595, 1433, 1132, 669. HRMS ( $m/z$ ): calculated for  $\text{C}_{28}\text{H}_{32}\text{N}_2\text{O}$  [ $\text{M} + \text{H}$ ], 413.2587; found: 413.2588.

*4-(1-(1-benzyl-1H-indol-3-yl)-2-(pyridin-2-yl)ethyl)-2,6-di-tert-butylphenol (3ao).*

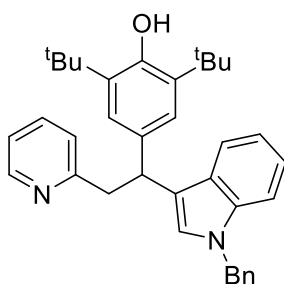

Brown solid (32.7 mg, 90%); mp, 129.2-135.3  $^{\circ}\text{C}$ .  $^1\text{H}$  NMR (500 MHz,  $\text{CDCl}_3$ ):  $\delta$  (ppm) 8.51 (d,  $J = 4.1$  Hz, 1H), 7.54 (d,  $J = 8.0$  Hz, 1H), 7.37 (td,  $J = 7.7, 1.7$  Hz, 1H), 7.25-7.22 (m, 3H), 7.18(d,  $J = 8.2$  Hz, 1H), 7.11-7.08 (m, 1H), 7.05 (s, 2H), 7.03-7.00 (m, 3H), 6.99-6.96 (m, 2H), 6.82 (d,  $J = 7.8$  Hz, 1H), 5.31-5.22 (m, 2H), 4.96 (s, 1H), 4.73 (t,  $J = 8.0$  Hz, 1H), 3.65-3.60 (m, 1H), 3.44-3.39 (m, 1H), 1.33 (s, 18H).  $^{13}\text{C}$  NMR (125 MHz,  $\text{CDCl}_3$ ):  $\delta$  (ppm) 160.7, 151.9, 148.8, 137.9, 136.8, 135.9, 135.3, 135.0, 128.7, 127.9, 127.4, 126.5, 125.9, 124.4, 123.9, 121.5, 120.9, 120.2, 118.8, 118.6, 109.4, 49.7, 45.5, 43.1, 34.3, 30.4. IR (FT IR,  $\text{cm}^{-1}$ ): 3608, 3447, 2953, 1591, 1433, 1366, 1236, 1119, 742. HRMS ( $m/z$ ): calculated for  $\text{C}_{36}\text{H}_{40}\text{N}_2\text{O}$  [ $\text{M} + \text{H}$ ], 517.3213; found 517.3209.

*2,6-di-tert-butyl-4-(1-(furan-2-yl)-2-(pyridin-2-yl)ethyl)phenol (3ap).*

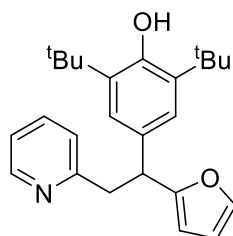

Brown solid (32.1 mg, 81%); mp, 126.2-132.0  $^{\circ}\text{C}$ .  $^1\text{H}$  NMR (500 MHz,  $\text{CDCl}_3$ ):  $\delta$  (ppm) 8.53 (d,  $J = 4.3$  Hz, 1H), 7.44 (td,  $J = 7.6, 1.5$  Hz, 1H), 7.31 (d,  $J = 1.1$  Hz, 1H), 7.07-7.05 (m, 1H), 6.97 (s, 2H), 6.82 (d,  $J = 7.8$  Hz, 1H), 6.23-6.22 (m, 1H), 6.03 (d,  $J = 3.1$  Hz, 1H), 5.03 (s, 1H),

4.48 (t,  $J = 8.0$  Hz, 1H), 3.54-3.50 (m, 1H), 3.28-3.23 (m, 1H), 1.37 (s, 18H).  $^{13}\text{C}$  NMR (125 MHz,  $\text{CDCl}_3$ ):  $\delta$  (ppm) 159.8, 157.1, 152.3, 148.9, 141.2, 136.0, 135.6, 132.7, 124.4, 123.8, 121.2, 109.9, 105.9, 45.4, 44.3, 34.3, 30.3. IR (FT IR,  $\text{cm}^{-1}$ ): 3423, 2957, 1435, 1115, 729. HRMS ( $m/z$ ): calculated for  $\text{C}_{25}\text{H}_{31}\text{NO}_2$  [ $\text{M} + \text{H}$ ], 378.2427; found 378.2423.

*2,6-di-tert-butyl-4-(2-(pyridin-2-yl)-1-(thiophen-2-yl)ethyl)phenol (3aq).*

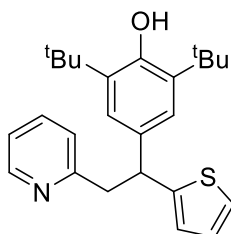

Brown solid (35.9 mg, 91%); mp, 141.8-144.8 °C.  $^1\text{H}$  NMR (500 MHz,  $\text{CDCl}_3$ ):  $\delta$  (ppm) 8.54 (s, 1H), 7.42 (s, 1H), 7.09-7.04 (m, 4H), 6.85 (s, 2H), 6.77 (s, 1H), 5.03 (s, 1H), 4.73 (t,  $J = 7.8$  Hz, 1H), 3.54-3.49 (m, 1H), 3.40-3.36 (m, 1H), 1.38 (s, 18H).  $^{13}\text{C}$  NMR (125 MHz,  $\text{CDCl}_3$ ):  $\delta$  (ppm) 159.8, 152.3, 149.1, 148.8, 135.9, 135.5, 134.4, 126.3, 124.3, 124.2, 124.0, 123.3, 121.1, 46.97, 46.91, 34.3, 30.3. IR (FT IR,  $\text{cm}^{-1}$ ): 3444, 2954, 2365, 1595, 1435, 692. HRMS ( $m/z$ ): calculated for  $\text{C}_{25}\text{H}_{31}\text{NOS}$  [ $\text{M} + \text{H}$ ], 394.2199; found 394.2196.

*2,6-di-tert-butyl-4-(3-methyl-1-(pyridin-2-yl)butan-2-yl)phenol (3ar).*

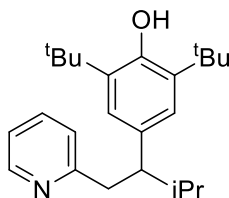

Brown gummy oil (18.6 mg, 46%).  $^1\text{H}$  NMR (500 MHz,  $\text{CDCl}_3$ ):  $\delta$  (ppm) 8.48 (d,  $J = 3.7$  Hz, 1H), 7.37-7.34 (m, 1H), 7.00-6.98 (m, 1H), 6.76 (s, 2H), 6.69 (d,  $J = 7.7$  Hz, 1H), 4.92 (s, 1H), 3.29 (dd,  $J = 12.7, 5.5$  Hz, 1H), 2.90-2.86 (m, 1H), 2.83-2.78 (m, 1H), 1.94-1.87 (m, 1H), 1.36 (s, 18H), 1.00 (d,  $J = 6.5$  Hz, 3H), 0.81 (d,  $J = 6.6$  Hz, 3H).  $^{13}\text{C}$  NMR (125 MHz,  $\text{CDCl}_3$ ):  $\delta$  (ppm) 161.6, 151.6, 148.7, 135.7, 134.9, 133.4, 124.9, 123.9, 120.6, 52.9, 42.5, 34.2, 32.1, 30.4, 21.2, 20.1. IR (FT IR,  $\text{cm}^{-1}$ ): 2960, 1595, 1433, 1223, 1007, 773. HRMS ( $m/z$ ): calculated for  $\text{C}_{24}\text{H}_{35}\text{NO}$  [ $\text{M} + \text{H}$ ], 354.2791; found 354.2786.

*2,6-diisopropyl-4-(1-phenyl-2-(pyridin-2-yl)ethyl)phenol (3as).*

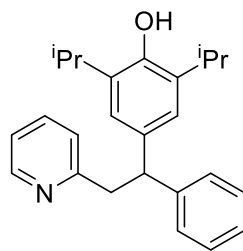

White solid (20.3 mg, 50%); mp, 149.8-154.9 °C.  $^1\text{H}$  NMR (500 MHz,  $\text{CDCl}_3$ ):  $\delta$  (ppm) 8.52 (d,  $J = 4.0$  Hz, 1H), 7.40 (td,  $J = 7.5, 1.5$  Hz, 1H), 7.25-7.21 (m, 4H), 7.14-7.12 (m, 1H), 7.03-7.01 (m, 1H), 6.87 (s, 2H), 6.83 (d,  $J = 7.5$  Hz, 1H) 4.75 (s, 1H), 4.51 (t,  $J = 8.0$  Hz, 1H), 3.53-3.43 (m, 2H), 3.11-3.06 (m, 2H), 1.19 (d,  $J = 7.0$  Hz, 6H), 1.16 (d,  $J = 7.0$  Hz, 6H).  $^{13}\text{C}$  NMR (125 MHz,  $\text{CDCl}_3$ ):  $\delta$  (ppm) 160.3, 149.1, 148.2, 144.6, 136.0, 135.9, 133.4, 128.2, 128.0, 125.9, 123.9, 123.1, 120.9, 50.9, 44.9, 27.2, 22.79, 22.74. IR (FT IR,  $\text{cm}^{-1}$ ): 3317, 2972, 1692, 1466, 1129, 951, 816. HRMS ( $m/z$ ): calculated for  $\text{C}_{24}\text{H}_{35}\text{NO}$  [ $\text{M} + \text{H}$ ], 360.2321; found 360.2312.

*2,6-di-tert-butyl-4-(1-phenyl-2-(quinolin-2-yl)ethyl)phenol (3ba).*

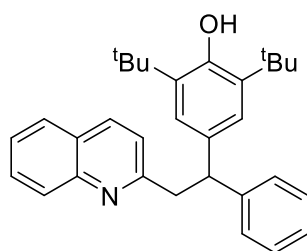

Off-white solid (43.7 mg, 98%); mp, 166.1-175.5 °C.  $^1\text{H}$  NMR (500 MHz,  $\text{CDCl}_3$ ):  $\delta$  (ppm) 8.08-8.05 (m, 1H), 7.92-7.89 (m, 1H), 7.72 (d,  $J = 8.0$  Hz, 1H), 7.68-7.65 (m, 1H), 7.48-7.45 (m, 1H), 7.30 (d,  $J = 7.4$  Hz, 2H), 7.24-7.21 (m, 2H), 7.14-7.11 (m, 1H), 7.01 (s, 3H), 4.99 (s, 1H), 4.59 (t,  $J = 8.0$  Hz, 1H), 3.75-3.63 (m, 2H), 1.33 (s, 18 H).  $^{13}\text{C}$  NMR (125 MHz,  $\text{CDCl}_3$ ):  $\delta$  (ppm) 161.1, 152.0, 147.6, 144.5, 135.9, 135.5, 134.7, 129.4, 128.6, 128.3, 128.1, 127.4, 126.7, 126.0, 125.8, 124.6, 122.2, 51.3, 45.6, 34.3, 30.3. IR (FT IR,  $\text{cm}^{-1}$ ): 2953, 2561, 1597, 1388, 1224, 1120, 819, 621. HRMS ( $m/z$ ): calculated for  $\text{C}_{31}\text{H}_{35}\text{NO}$  [ $\text{M} + \text{H}$ ], 438.2791; found: 438.2787.

*2,6-di-tert-butyl-4-(2-(6-methylpyridin-2-yl)-1-phenylethyl)phenol (3ca).*

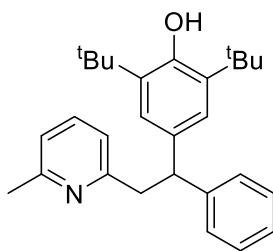

White solid (32.6 mg, 80%); mp, 121.9-127.5 °C. <sup>1</sup>H NMR (500 MHz, CDCl<sub>3</sub>): δ (ppm) 7.31-7.21 (m, 5H), 7.14-7.11 (m, 1H), 6.96 (s, 2H), 6.87 (d, *J* = 7.6 Hz, 1H), 6.63 (d, *J* = 7.7 Hz, 1H), 4.98 (s, 1H), 4.44 (t, *J* = 8 Hz, 1H), 3.50-3.38 (m, 2H), 2.51 (s, 3H), 1.36 (s, 18H). <sup>13</sup>C NMR (125 MHz, CDCl<sub>3</sub>): δ (ppm) 159.7, 157.5, 151.9, 144.7, 135.9, 135.3, 135.0, 128.1, 125.9, 124.6, 120.6, 120.4, 51.1, 44.9, 34.3, 30.3, 24.4. IR (FT IR, cm<sup>-1</sup>): 3366, 2957, 1595, 1456, 1113, 790, 702. HRMS (*m/z*): calculated for C<sub>28</sub>H<sub>35</sub>NO [*M* + *H*], 402.2791; found: 402.2783.

*2,6-di-tert-butyl-4-(2-(4,6-dimethylpyridin-2-yl)-1-phenylethyl)phenol (3da)*.

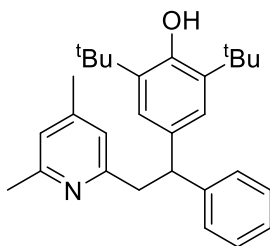

White solid (32.8 mg, 77%); mp, 144.5-148.3 °C. <sup>1</sup>H NMR (500 MHz, CDCl<sub>3</sub>): δ (ppm) 7.27-7.21 (m, 4H), 7.14-7.11 (m, 1H), 6.93 (s, 2H), 6.70 (s, 1H), 6.44 (s, 1H), 4.97 (s, 1H), 4.42 (t, *J* = 8 Hz, 1H), 3.45-3.41 (m, 1H), 3.35-3.31 (m, 1H), 2.46 (s, 3H), 2.11 (s, 3H), 1.35 (s, 18 H). <sup>13</sup>C NMR (125 MHz, CDCl<sub>3</sub>): δ (ppm) 159.5, 157.2, 151.8, 146.8, 144.8, 135.3, 135.1, 128.14, 128.11, 125.8, 124.6, 121.8, 121.4, 51.1, 44.8, 34.3, 30.3, 24.3, 20.7. IR (FT IR, cm<sup>-1</sup>): 3312, 2949, 1612, 1439, 1223, 702. HRMS (*m/z*): calculated for C<sub>29</sub>H<sub>37</sub>NO [*M* + *H*], 416.2947; found: 416.2939.

*2,6-di-tert-butyl-4-(1-phenyl-2-(quinolin-4-yl)ethyl)phenol (3ea)*.

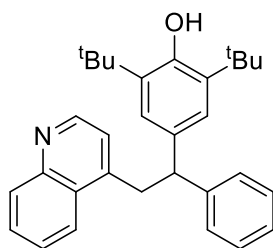

Off-white solid (22.5 mg, 50%); mp, 183.4-187.1 °C. <sup>1</sup>H NMR (500 MHz, CDCl<sub>3</sub>): δ (ppm) 8.66 (d, *J* = 4.4 Hz, 1H), 8.12 (d, *J* = 8.4 Hz, 1H), 7.97 (d, *J* = 8.4 Hz, 1H), 7.72-7.69 (m, 1H), 7.53-7.50 (m, 1H), 7.32-7.29 (m, 3H), 7.25-7.21 (m, 2H), 6.89 (s, 2H), 6.87 (d, *J* = 4.5 Hz, 1H), 5.06 (s, 1H), 4.34 (t, *J* = 7.6 Hz, 1H), 3.77 (d, *J* = 7.6 Hz, 2H), 1.35 (s, 18H). <sup>13</sup>C NMR (125 MHz, CDCl<sub>3</sub>): δ (ppm) 152.3, 149.7, 148.2, 146.7, 144.2, 135.7, 134.3, 130.1, 128.9, 128.4, 127.9, 127.8, 126.4, 126.2, 124.4, 123.6, 122.1, 51.7, 38.9, 34.3, 30.2. IR (FT IR, cm<sup>-1</sup>): 3339, 2943, 1591, 1431, 1228, 1114, 756. HRMS (*m/z*): calculated for C<sub>31</sub>H<sub>35</sub>NO [M + H], 438.2791; found: 438.2787.

*2,6-di-tert-butyl-4-(1-phenyl-2-(pyridin-4-yl)ethyl)phenol (3fa)*.

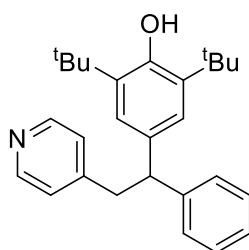

Off-white solid (83.7 mg, 64%, **1a** (100mg) used); mp, 169.3-172.4 °C. <sup>1</sup>H NMR (500 MHz, CDCl<sub>3</sub>): δ (ppm) 8.38 (d, *J* = 3.3 Hz, 2H), 7.27-7.24 (m, 2H), 7.20-7.16 (m, 3H), 6.93 (s, 2H), 6.91 (d, *J* = 4.3 Hz, 2H), 5.06 (s, 1 H), 4.11 (t, *J* = 7.8 Hz, 1H), 3.34-3.26 (m, 2H), 1.37 (s, 18H). <sup>13</sup>C NMR (125 MHz, CDCl<sub>3</sub>): δ (ppm) 152.3, 150.5, 148.8, 143.9, 135.7, 134.1, 128.4, 127.9, 126.4, 124.8, 124.3, 52.3, 42.2, 34.4, 30.3. IR (FT IR, cm<sup>-1</sup>): 3445, 2957, 1601, 1433, 1240, 1113, 700. HRMS (*m/z*): calculated for C<sub>27</sub>H<sub>33</sub>NO [M + H], 388.2634; found: 388.2624.

*2,6-di-tert-butyl-4-(1-phenyl-2-(pyrazin-2-yl)ethyl)phenol (3ga)*.

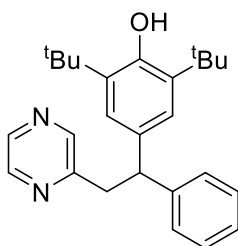

Off-white solid (39.1 mg, 99%); mp, 128.6-131.6 °C. <sup>1</sup>H NMR (500 MHz, CDCl<sub>3</sub>): δ (ppm) 8.47 (s, 1H), 8.30 (s, 1H), 8.11 (s, 1H), 7.25-7.24 (m, 4H), 7.16-7.14 (m, 1H), 6.98 (s, 2H), 5.04 (s, 1H), 4.47 (t, *J* = 8.0 Hz, 1H), 3.53-3.44 (m, 2H), 1.37 (s, 18H). <sup>13</sup>C NMR (125 MHz, CDCl<sub>3</sub>): δ (ppm) 156.1, 152.2, 145.3, 143.9, 143.8, 141.9, 135.7, 134.1, 128.4, 127.9, 126.3,



124.4, 50.9, 42.2, 34.3, 30.3. IR (FT IR,  $\text{cm}^{-1}$ ): 3584, 2957, 1433, 1240, 1113, 698. HRMS (m/z): calculated for  $\text{C}_{26}\text{H}_{32}\text{N}_2\text{O}$  [M + H], 389.2587; found: 389.2574.

*2,6-di-tert-butyl-4-(1-phenyl-2-(quinoxalin-2-yl)ethyl)phenol (3ha).*

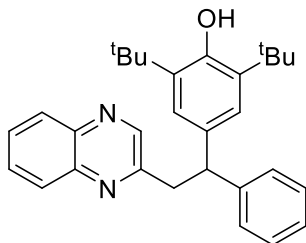

Brown solid (40.7 mg, 91%); mp, 149.7-156.0 °C.  $^1\text{H}$  NMR (500 MHz,  $\text{CDCl}_3$ ):  $\delta$  (ppm) 8.34 (s, 1H), 8.04 (dd,  $J = 8.3, 0.9$  Hz, 1H), 8.00 (d,  $J = 8.2$  Hz, 1H), 7.75-7.66 (m, 2H), 7.30 (d,  $J = 7.3$  Hz, 2H), 7.26-7.23 (m, 2H), 7.16-7.14 (m, 1H), 6.98 (s, 2H), 5.02 (s, 1H), 4.59 (t,  $J = 8.1$  Hz, 1H), 3.75-3.65 (m, 2H), 1.32 (s, 18H).  $^{13}\text{C}$  NMR (125 MHz,  $\text{CDCl}_3$ ):  $\delta$  (ppm) 156.0, 152.3, 146.1, 143.9, 142.3, 141.0, 135.7, 134.0, 129.8, 129.1, 129.0, 128.8, 128.5, 127.9, 126.4, 124.5, 51.1, 43.0, 34.3, 30.3. IR (FT IR,  $\text{cm}^{-1}$ ): 3487, 2963, 1433, 1238, 1117, 765, 698. HRMS (m/z): calculated for  $\text{C}_{30}\text{H}_{34}\text{N}_2\text{O}$  [M + H], 439.2743; found: 439.2730.

*2,6-di-tert-butyl-4-(2-(isoquinolin-1-yl)-1-phenylethyl)phenol (3ia).*

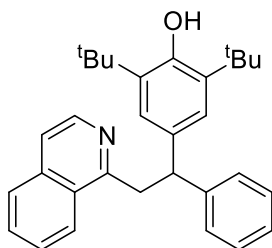

Off-white solid (41.3 mg, 93%); mp, 180.6-188.5 °C.  $^1\text{H}$  NMR (500 MHz,  $\text{CDCl}_3$ ):  $\delta$  (ppm) 8.42 (d,  $J = 5.7$  Hz, 1H), 7.86 (d,  $J = 8.6$  Hz, 1H), 7.73 (d,  $J = 8.2$  Hz, 1H), 7.58-7.55 (m, 1H), 7.45 (d,  $J = 5.7$  Hz, 1H), 7.41-7.38 (m, 1H), 7.31 (d,  $J = 7.7$  Hz, 2H), 7.26-7.22 (m, 2H), 7.16-7.13 (m, 1H), 6.83 (s, 2H), 4.90 (s, 1H), 4.70 (t,  $J = 7.8$  Hz, 1H), 4.01-3.88 (m, 2H), 1.25 (s, 18H).  $^{13}\text{C}$  NMR (125 MHz,  $\text{CDCl}_3$ ):  $\delta$  (ppm) 160.6, 151.9, 144.6, 141.8, 136.1, 135.3, 134.8, 129.5, 128.2, 128.1, 127.7, 127.1, 126.7, 125.9, 125.3, 124.6, 119.1, 51.2, 41.3, 34.2, 30.2. IR (FT IR,  $\text{cm}^{-1}$ ): 3422, 2951, 1431, 1357, 1078, 704. HRMS (m/z): calculated for  $\text{C}_{31}\text{H}_{35}\text{NO}$  [M + H], 438.2791; found: 438.2778.

*4-(2-(benzo[d]thiazol-2-yl)-1-phenylethyl)-2,6-di-tert-butylphenol (3ja).*

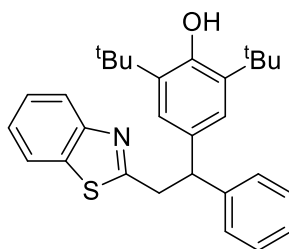

White solid (24.2 mg, 54%); mp, 167.9-169.0 °C. <sup>1</sup>H NMR (500 MHz, CDCl<sub>3</sub>): δ (ppm) 7.94 (d, *J* = 8.0 Hz, 1H), 7.74 (d, *J* = 8.0 Hz, 1H), 7.43-7.40 (m, 1H), 7.34-7.32 (m, 2H), 7.30-7.26 (m, 3H), 7.19-7.16 (m, 1H), 7.06 (s, 2H), 5.05 (s, 1H), 4.56 (t, *J* = 8 Hz, 1H), 3.88-3.75 (m, 2H), 1.36 (s, 18H). <sup>13</sup>C NMR (125 MHz, CDCl<sub>3</sub>): δ (ppm) 170.4, 152.9, 152.4, 143.5, 135.8, 135.3, 133.8, 128.5, 127.9, 126.5, 125.8, 124.6, 124.4, 122.5, 121.4, 51.2, 41.1, 34.4, 30.3. IR (FT IR, cm<sup>-1</sup>): 3568, 2957, 1433, 1101, 802, 696. HRMS (*m/z*): calculated for C<sub>29</sub>H<sub>33</sub>NOS [*M* + H], 444.2355; found 444.2353.

*2,6-di-tert-butyl-4-(1-phenyl-2-(pyridin-2-yl)propyl)phenol (3ka)*.

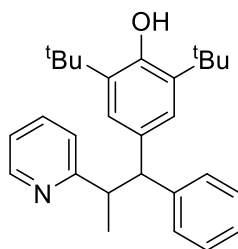

Brown gummy oil (31.6 mg, 77%). <sup>1</sup>H NMR (500 MHz, CDCl<sub>3</sub>): 8.51 (d, *J* = 4.7 Hz, 1H), 8.47 (d, *J* = 4.8 Hz, 1H), 7.44 (d, *J* = 7.7 Hz, 2H), 7.38 (td, *J* = 7.6, 1.6 Hz, 1H), 7.34-7.31 (m, 3H), 7.21-7.16 (m, 5H), 7.06-7.03 (m, 2H), 6.96-6.93 (m, 4H), 6.81 (s, 2H), 6.77 (d, *J* = 7.8 Hz, 1H), 5.01 (s, 1H), 4.81 (s, 1H), 4.18 (t, *J* = 11.4, 2H), 3.70-3.58 (m, 2H), 1.43 (s, 18H), 1.26-1.24 (m, 21H), 1.21 (d, *J* = 6.8 Hz, 3H). <sup>13</sup>C NMR (125 MHz, CDCl<sub>3</sub>): δ (ppm) 165.24, 165.18, 152.1, 151.4, 149.0, 148.9, 144.7, 144.2, 135.9, 135.64, 135.61, 134.9, 134.3, 134.2, 128.5, 128.1, 127.9, 126.0, 125.4, 124.8, 124.7, 123.5, 122.9, 120.9, 120.8, 58.1, 57.9, 47.4, 47.0, 34.4, 34.2, 30.4, 30.3, 20.7, 20.1. IR (FT IR, cm<sup>-1</sup>): 3639, 3427, 2959, 1593, 1435, 1232, 700. HRMS (*m/z*): calculated for C<sub>28</sub>H<sub>35</sub>NO [*M* + H], 402.2791; found: 402.2791.

**Procedure for de *tert*-butylation of 2,6-di-*tert*-butyl-4-(1-phenyl-2-(pyridin-4-yl)ethyl)phenol (4a)<sup>8</sup>**

A flame-dried round bottom flask equipped with a magnetic stirring bar, was charged with 2,6-di-*tert*-butyl-4-(1-phenyl-2-(pyridin-4-yl)ethyl)phenol (**3fa**) (150 mg, 1 equiv) in toluene (35

mL) at room temperature. Then a solution of AlCl<sub>3</sub> (311.2 mg, 6 equiv) in MeNO<sub>2</sub> (2 mL) was added in one portion. The mixture was immediately heated to 60 °C by using a preheated oil bath and maintained at the same temperature for 10 min. The mixture was subsequently cooled and poured into a separating funnel containing ice and Et<sub>2</sub>O (1:1, 50 mL). The aqueous layer was extracted with Et<sub>2</sub>O (3 x 50 mL). The organic phase was washed with brine, dried over anhydrous Na<sub>2</sub>SO<sub>4</sub> and concentrated under reduced pressure. The crude product was purified by column chromatography on silica gel and afforded the desired product as a white solid.

*4-(1-phenyl-2-(pyridin-4-yl)ethyl)phenol (4a)*.<sup>9</sup>

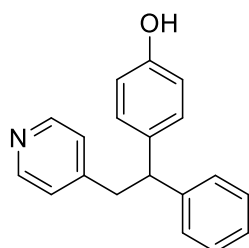

Off-white solid (93 mg, 87%); mp, 155.8-158.7 °C. <sup>1</sup>H NMR (500 MHz, CDCl<sub>3</sub>): δ (ppm) 8.36 (d, *J* = 4.3 Hz, 2H), 7.28-7.25 (m, 3H), 7.20-7.17 (m, 3H), 6.97 (d, *J* = 8.2 Hz, 2H), 6.93 (d, *J* = 4.7 Hz, 2H), 6.71 (d, *J* = 8.3 Hz, 2H), 4.14 (t, *J* = 7.9 Hz, 1H), 3.35-3.26 (m, 2H). <sup>13</sup>C NMR (125 MHz, CDCl<sub>3</sub>): δ (ppm) 154.9, 150.1, 148.9, 144.0, 135.1, 129.0, 128.5, 127.7, 126.5, 124.8, 115.5, 51.4, 41.7. IR (FT IR, cm<sup>-1</sup>): 3024, 2604, 1604, 1510, 1253, 833, 804, 559. HRMS (*m/z*): calculated for C<sub>19</sub>H<sub>17</sub>NO [*M* + *H*], 276.1382; found 276.1380.

### Crystal data and structure refinement for 3aa.

|                                   |                                             |                 |
|-----------------------------------|---------------------------------------------|-----------------|
| Identification code               | Compound_3aa                                |                 |
| CCDC code                         | 1979112                                     |                 |
| Empirical formula                 | C <sub>27</sub> H <sub>33</sub> N O         |                 |
| Formula weight                    | 387.54                                      |                 |
| Temperature                       | 296(2) K                                    |                 |
| Wavelength                        | 0.71073 Å                                   |                 |
| Crystal system                    | Monoclinic                                  |                 |
| Space group                       | P 21/n                                      |                 |
| Unit cell dimensions              | a = 9.3170(9) Å                             | α = 90°.        |
|                                   | b = 18.704(2) Å                             | β = 93.967(4)°. |
|                                   | c = 13.6865(14) Å                           | γ = 90°.        |
| Volume                            | 2379.4(4) Å <sup>3</sup>                    |                 |
| Z                                 | 4                                           |                 |
| Density (calculated)              | 1.082 Mg/m <sup>3</sup>                     |                 |
| Absorption coefficient            | 0.064 mm <sup>-1</sup>                      |                 |
| F(000)                            | 840                                         |                 |
| Crystal size                      | 0.180 x 0.140 x 0.110 mm <sup>3</sup>       |                 |
| Theta range for data collection   | 2.178 to 24.998°.                           |                 |
| Index ranges                      | -10 ≤ h ≤ 11, -22 ≤ k ≤ 22, -16 ≤ l ≤ 16    |                 |
| Reflections collected             | 32653                                       |                 |
| Independent reflections           | 4184 [R(int) = 0.0426]                      |                 |
| Completeness to theta = 24.998°   | 100.0 %                                     |                 |
| Absorption correction             | Semi-empirical from equivalents             |                 |
| Max. and min. transmission        | 0.993 and 0.988                             |                 |
| Refinement method                 | Full-matrix least-squares on F <sup>2</sup> |                 |
| Data / restraints / parameters    | 4184 / 0 / 269                              |                 |
| Goodness-of-fit on F <sup>2</sup> | 1.038                                       |                 |
| Final R indices [I > 2σ(I)]       | R1 = 0.0569, wR2 = 0.1319                   |                 |
| R indices (all data)              | R1 = 0.0955, wR2 = 0.1646                   |                 |
| Extinction coefficient            | n/a                                         |                 |
| Largest diff. peak and hole       | 0.212 and -0.184 e.Å <sup>-3</sup>          |                 |

## References

1. A. López, A. Parra, C. Jarava-Barrera and M. Tortosa, *Chem. Commun.*, 2015, **51**, 17684.
2. Y. Lou, P. Cao, T. Jia, Y. Zhang, M. Wang and J. Liao, *Angew. Chem. Int. Ed.*, 2015, **54**, 12134.
3. W.-D. Chu, L.-F. Zhang, X. Bao, X.-H. Zhao, C. Zeng, J.-Y. Du, G.-B. Zhang, F.-X. Wang, X.-Y. Ma and C.-A. Fan, *Angew. Chem. Int. Ed.*, 2013, **52**, 9229.
4. K. G. Ghosh, P. Chandu, S. Mondal and D. Sureshkumar, *Tetrahedron*, 2019, **75**, 4471.
5. V. Reddy and R.V. Anand, *Org. Lett.*, 2015, **17**, 3390.
6. S. Santra, A. Porey and J. Guin, *Asian J. Org. Chem.*, 2018, **7**, 477.
7. L. Wang, Y.-X. Jia, J.-M. Zhang, C. Qian and X.-Z. Chen, *Monatsh Chem.* 2014, **145**, 1941.
8. J. R. Frost, C. B. Cheong and T. J. Donohoe, *Synthesis*, 2017, **49**, 910.
9. S. A. Haroutonian, A. W. Scribner and J. A. Katzenellenbogen, *Steroids*, 1995, **60**, 636.

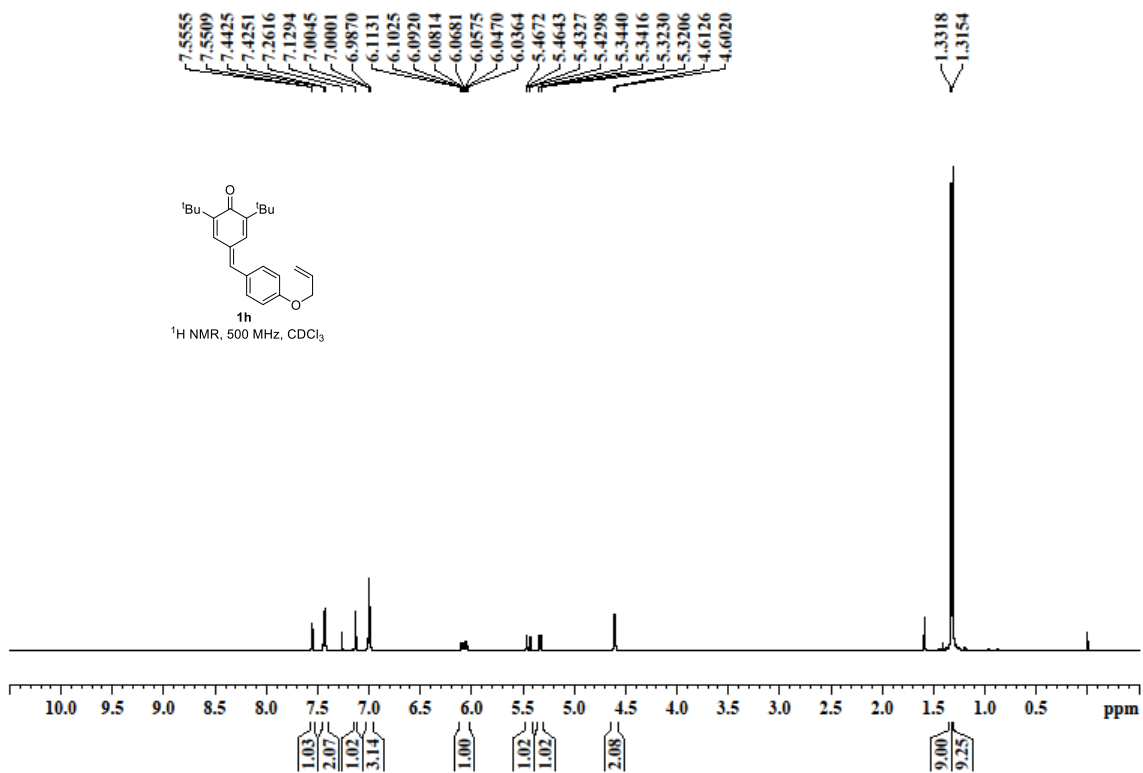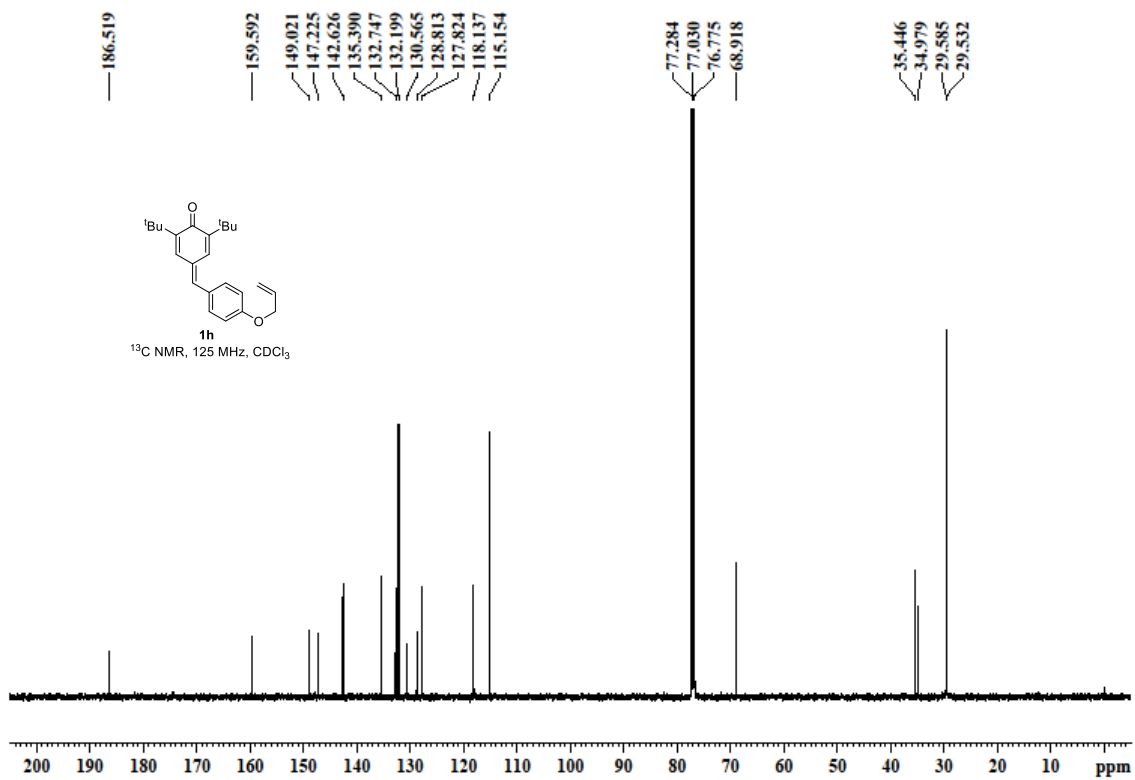

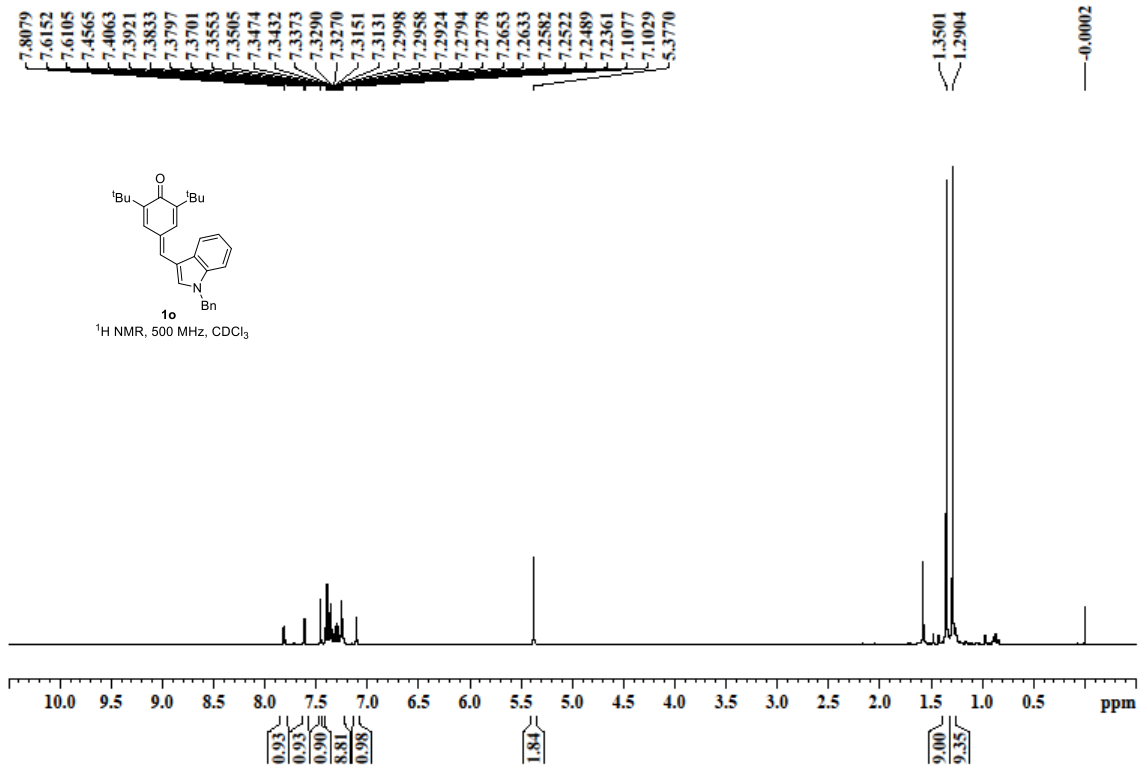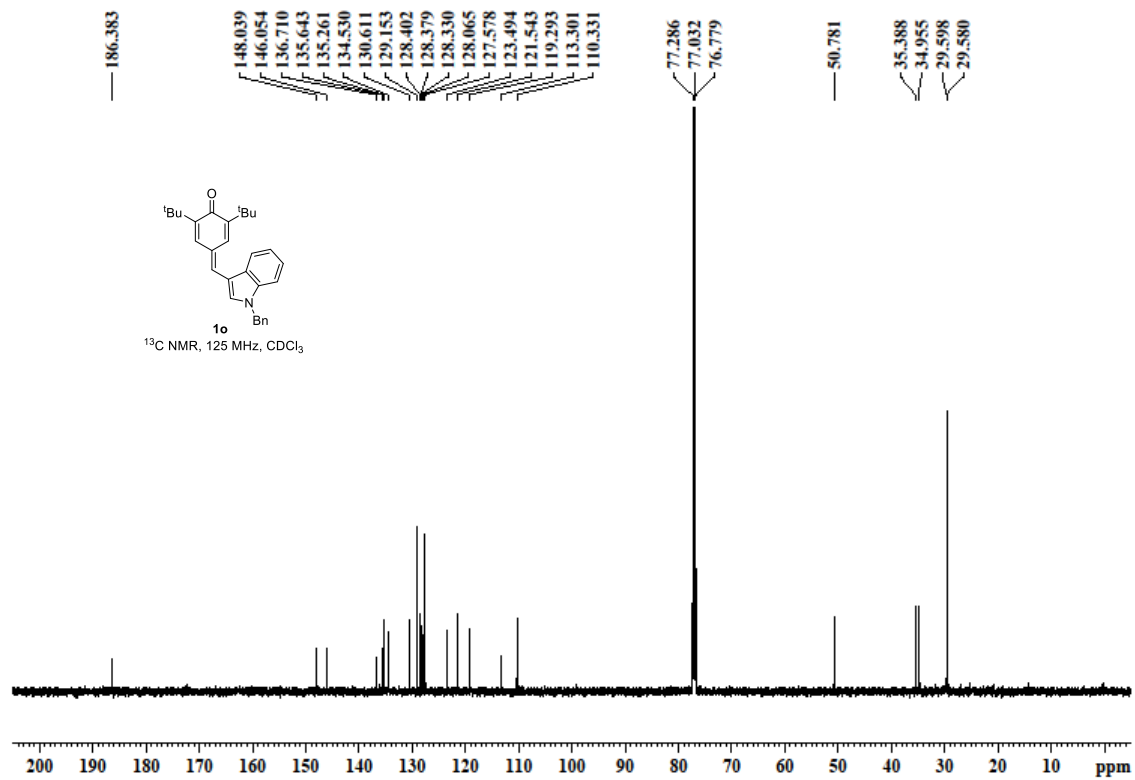

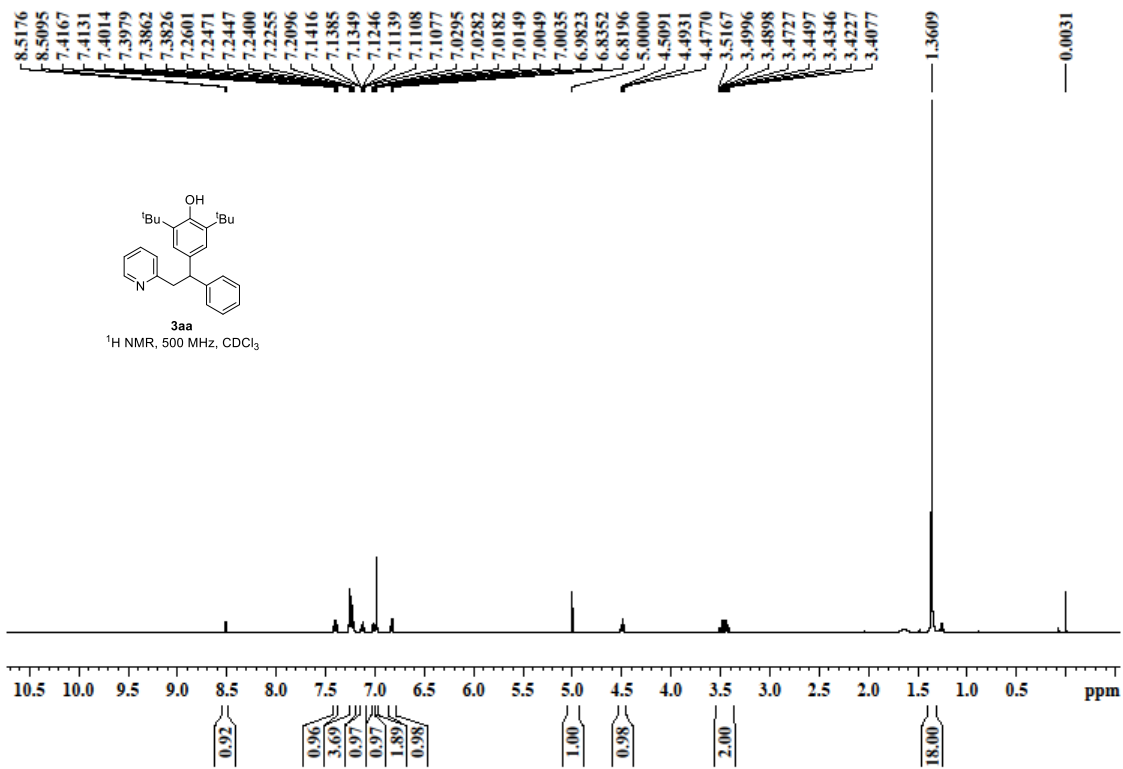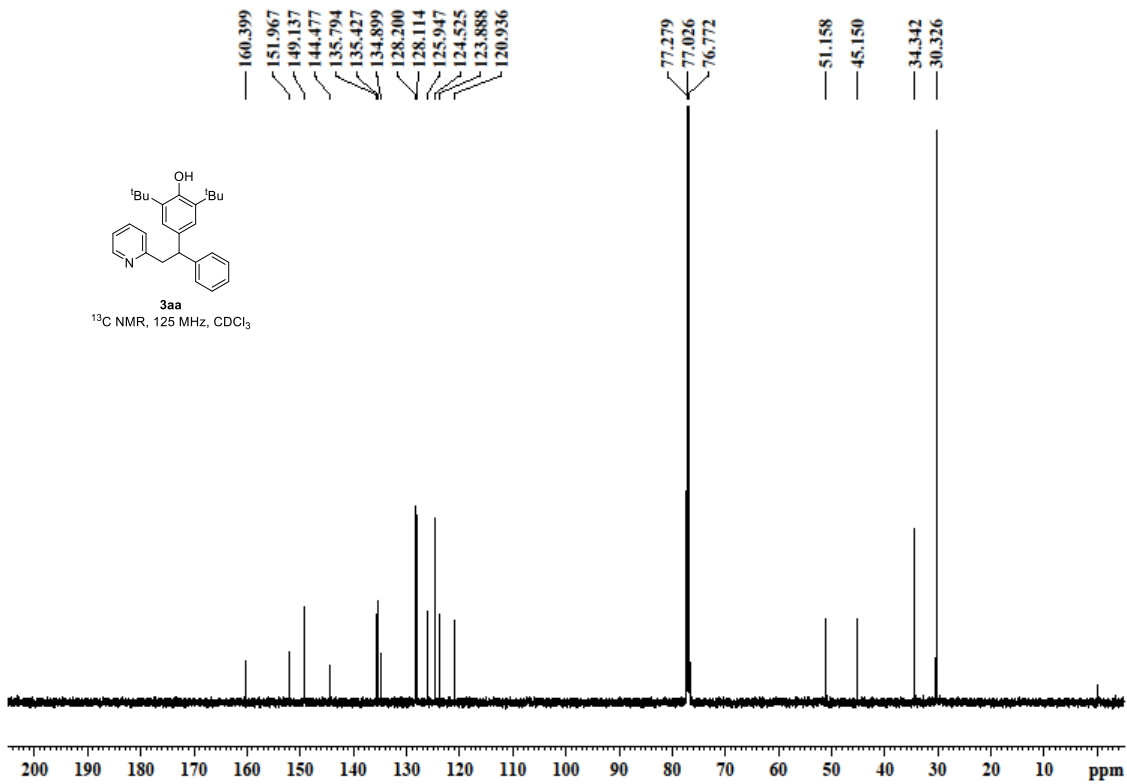



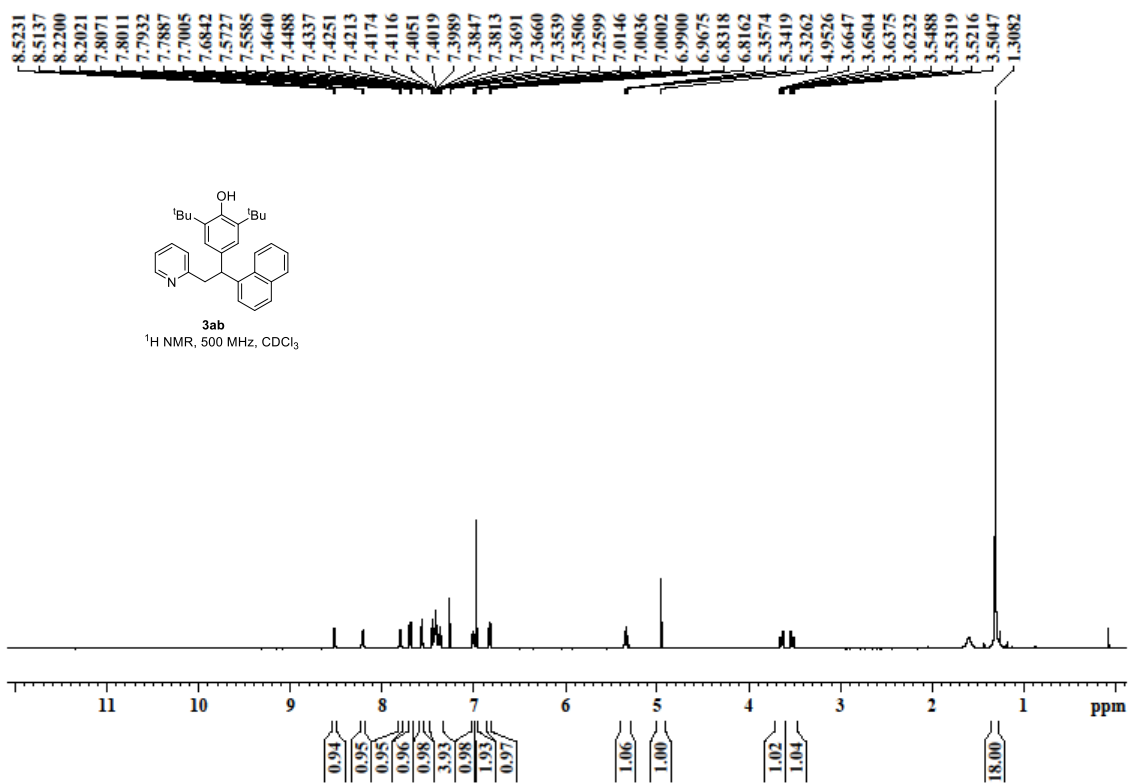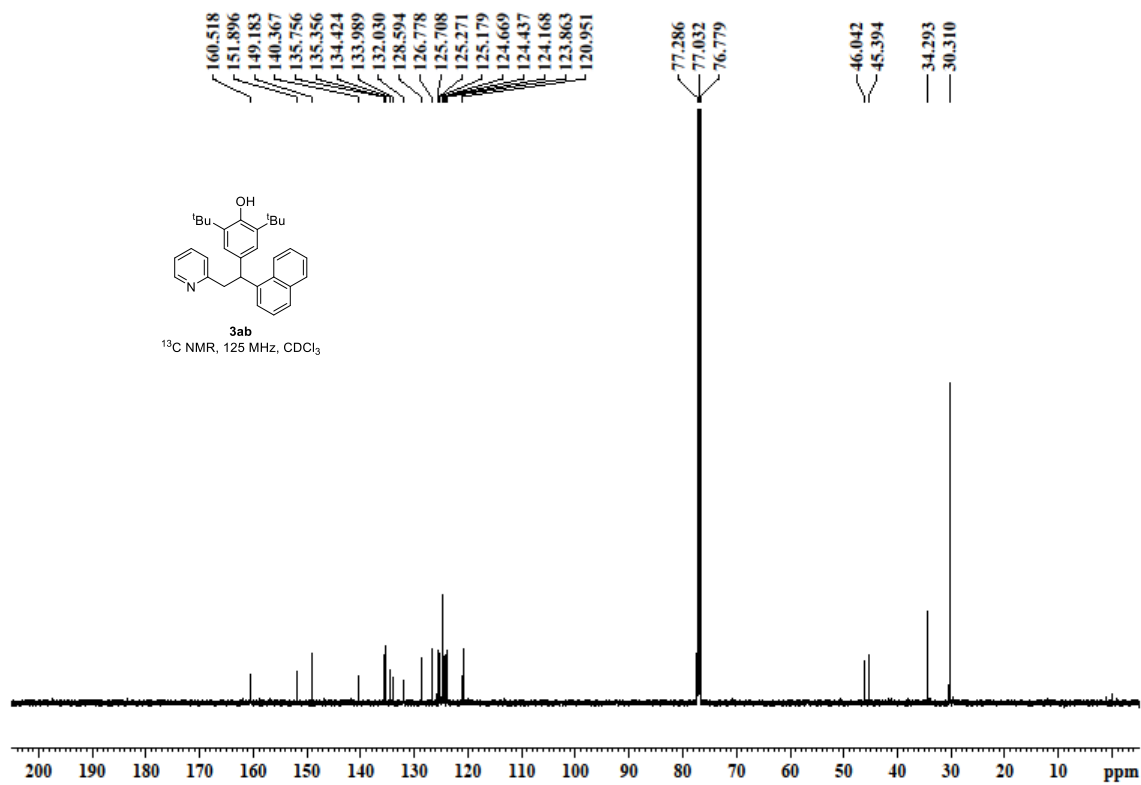

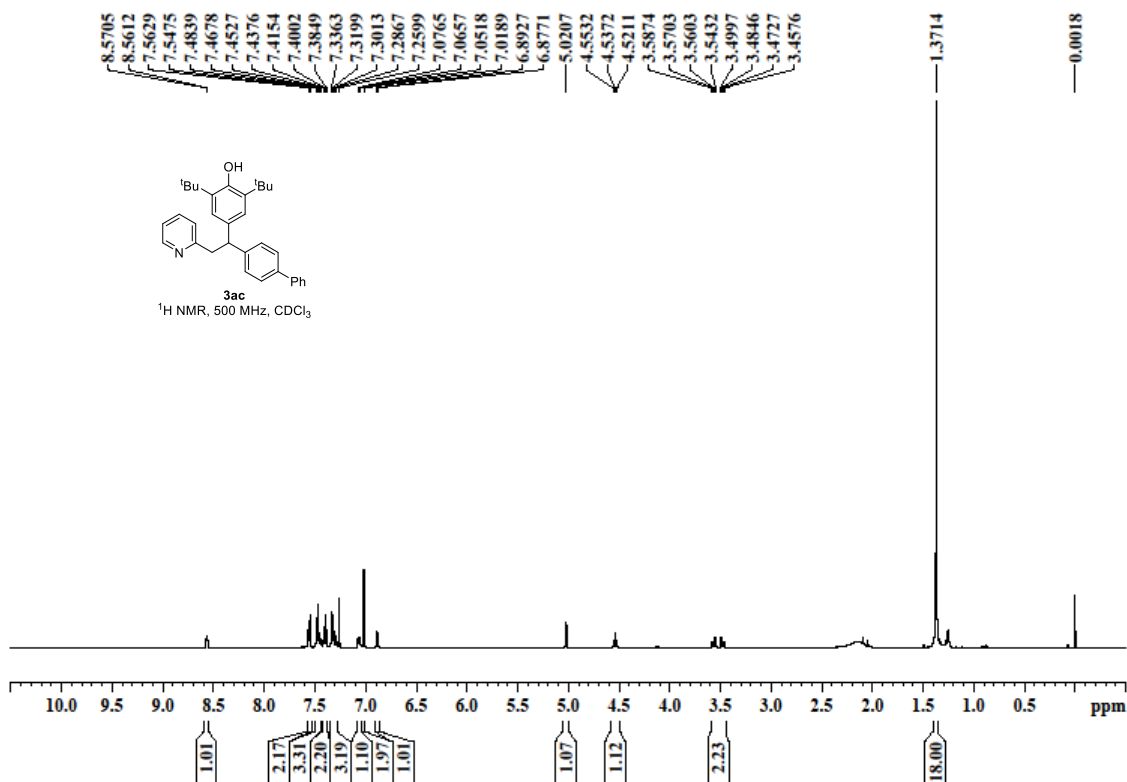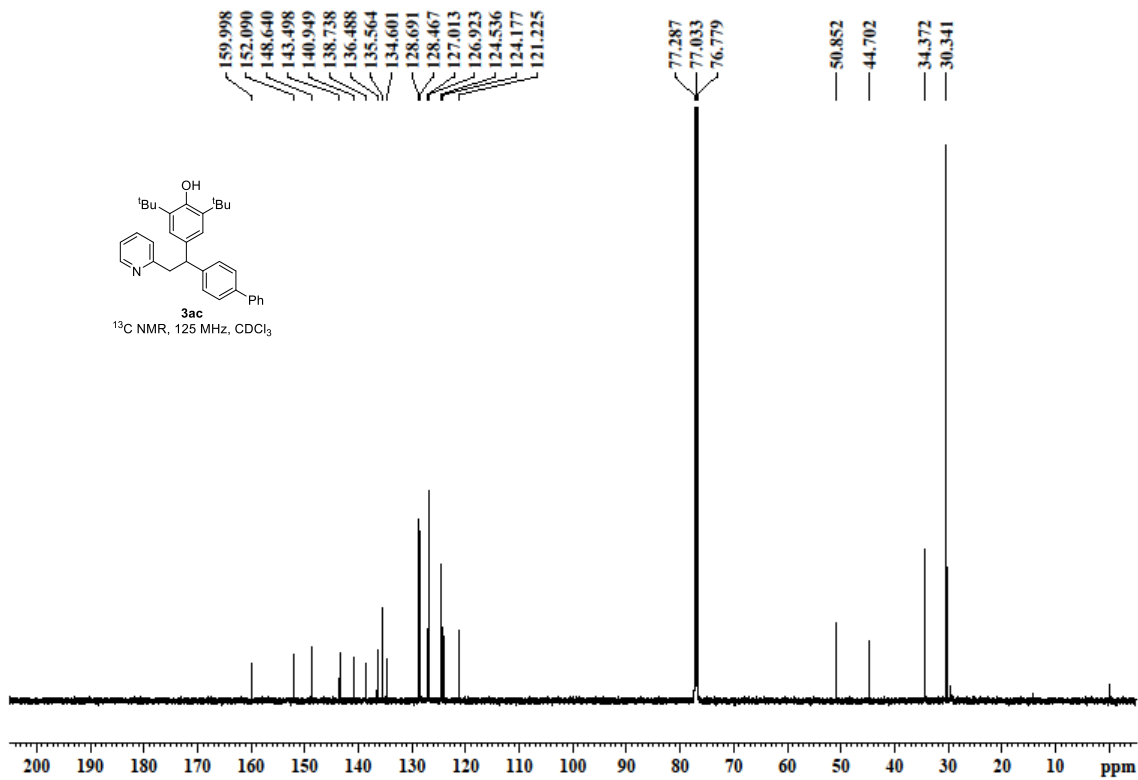

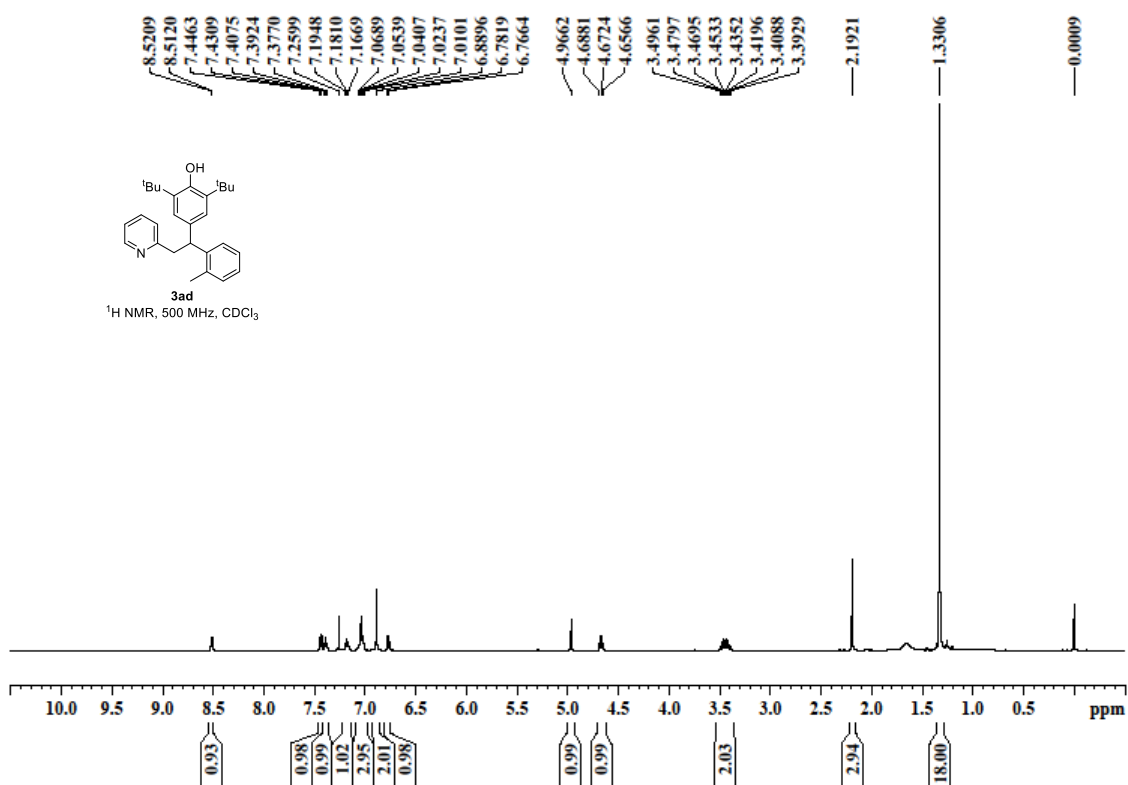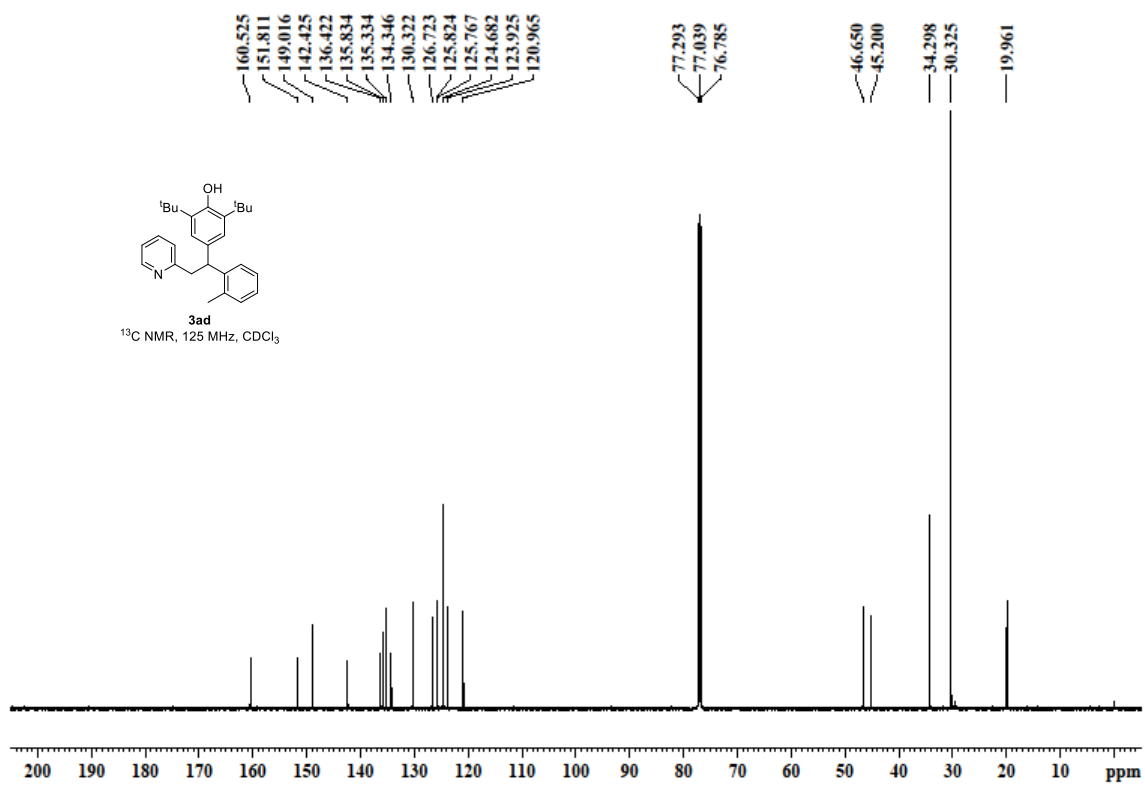

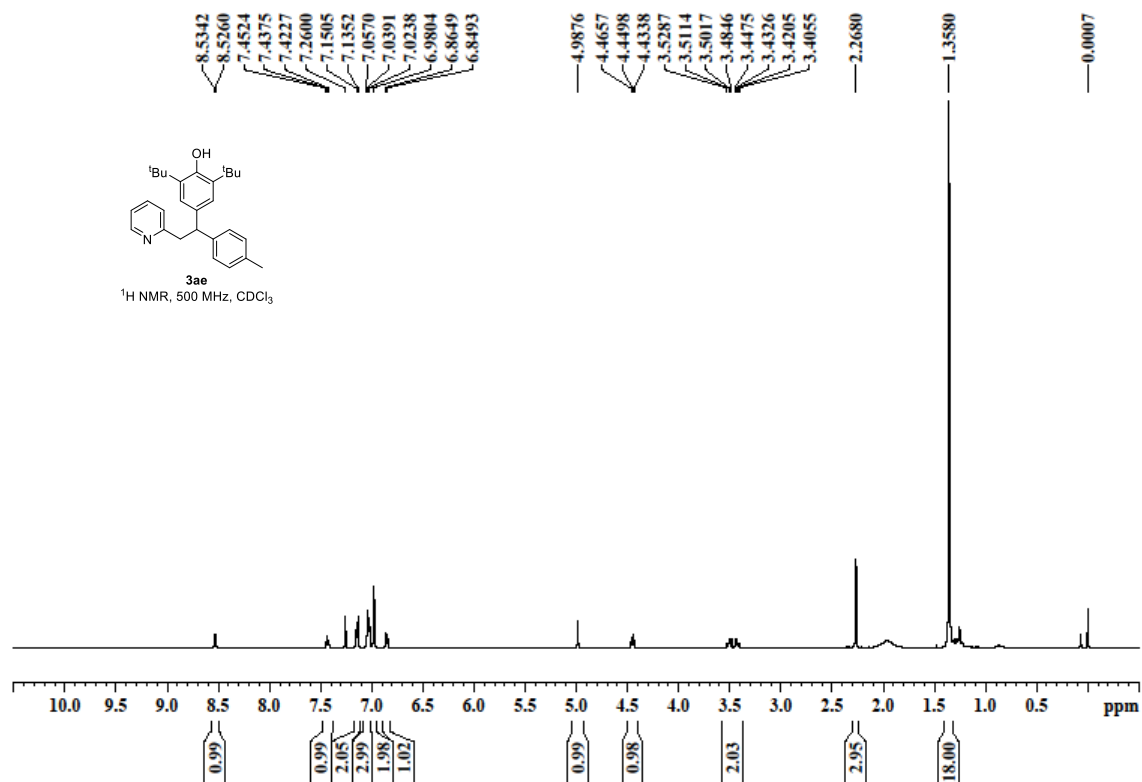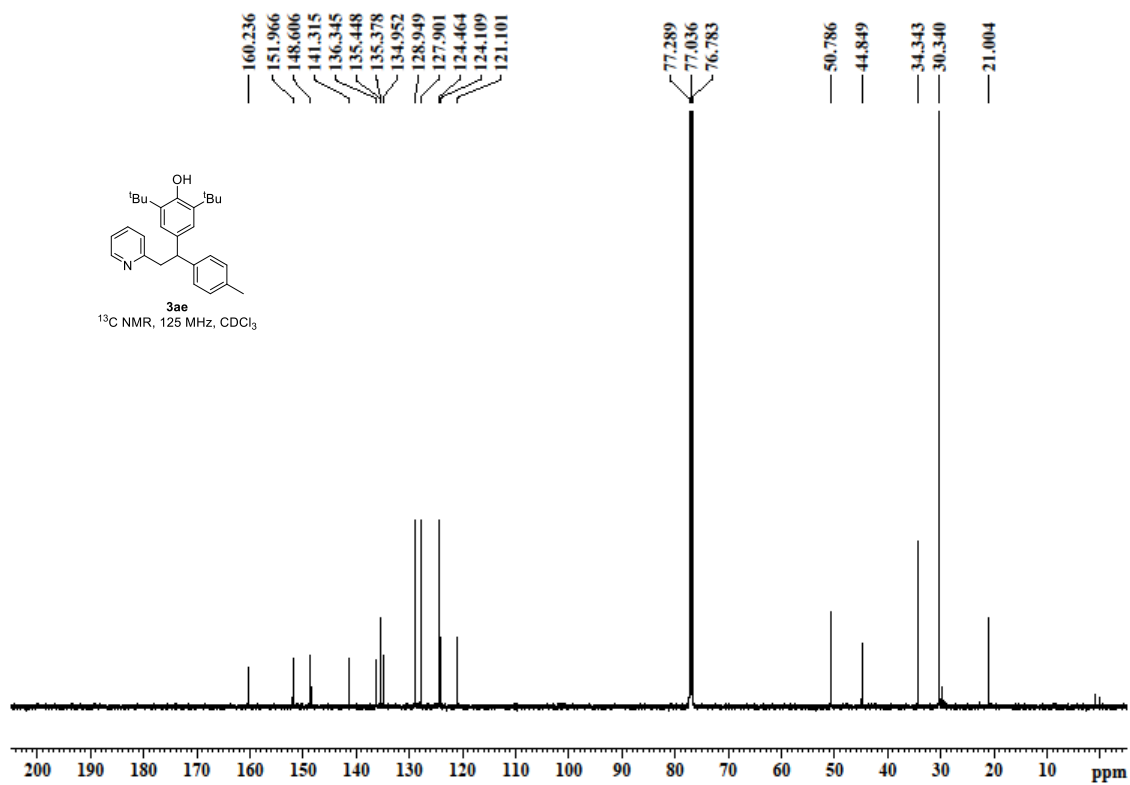

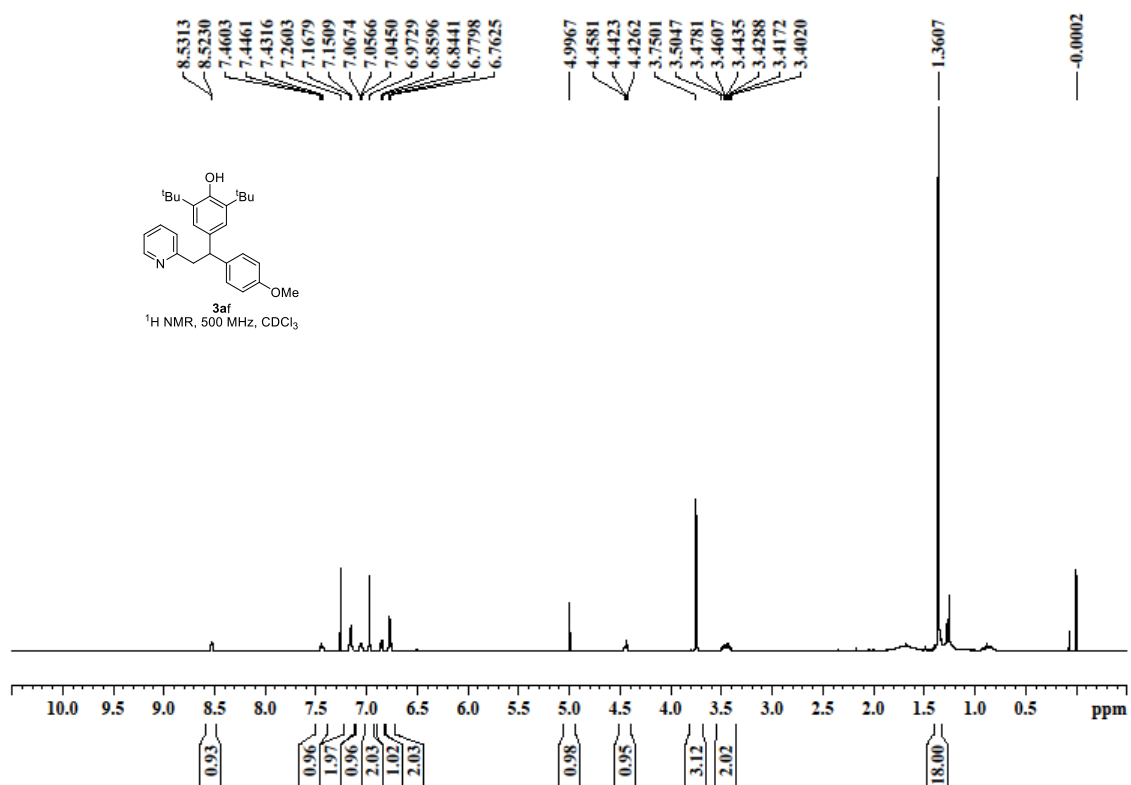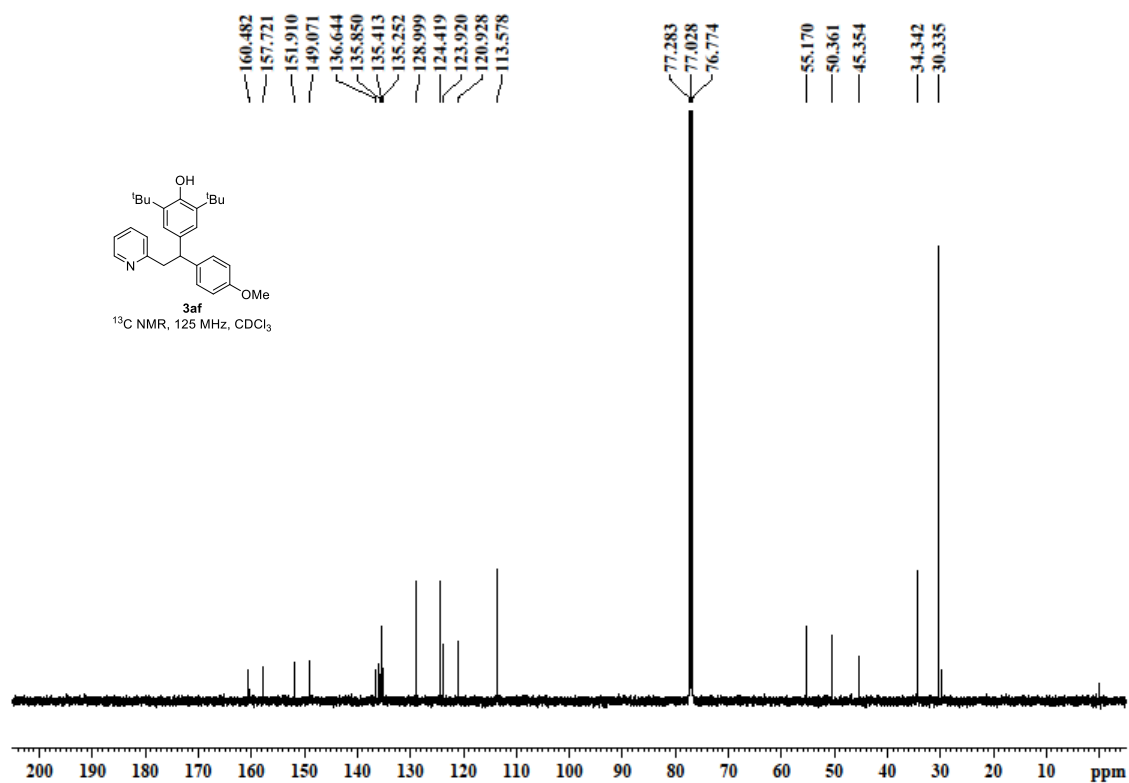

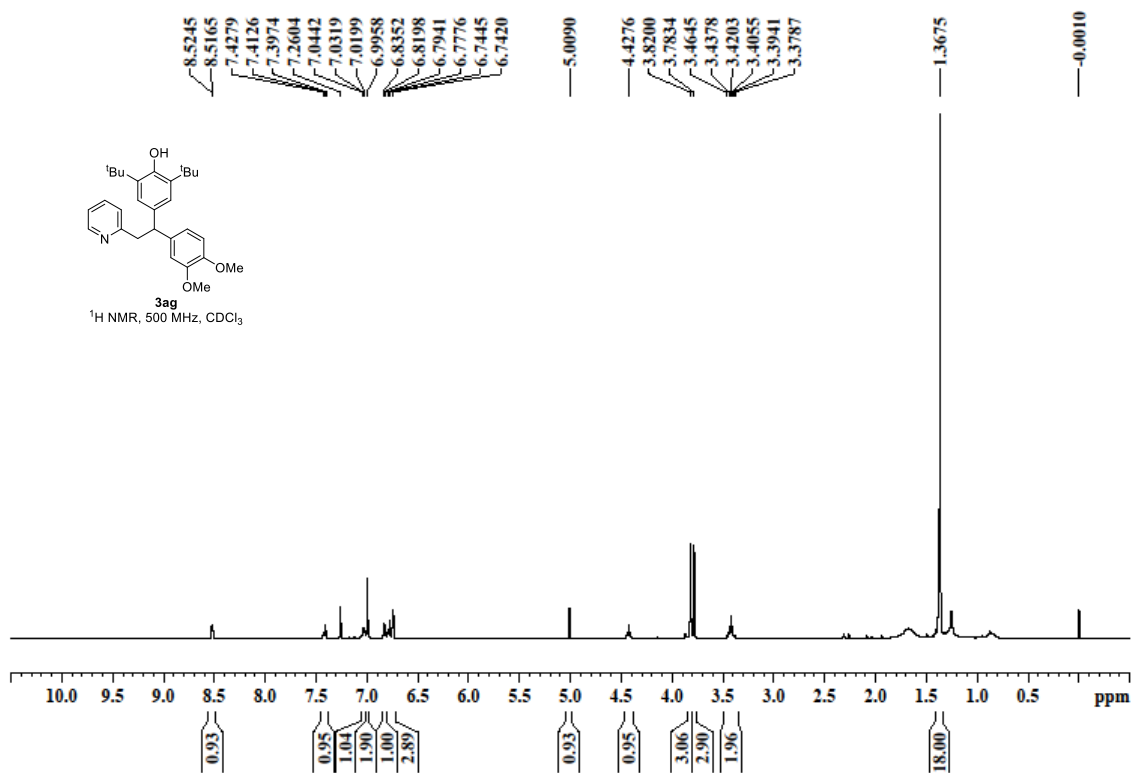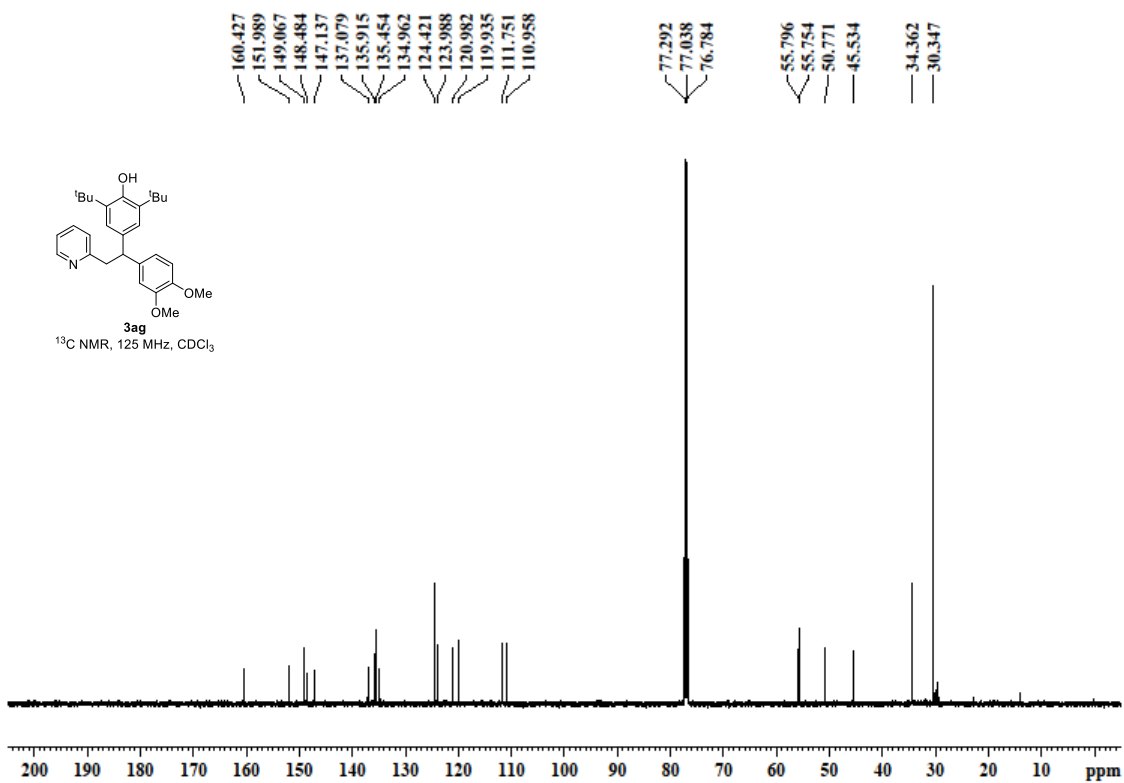

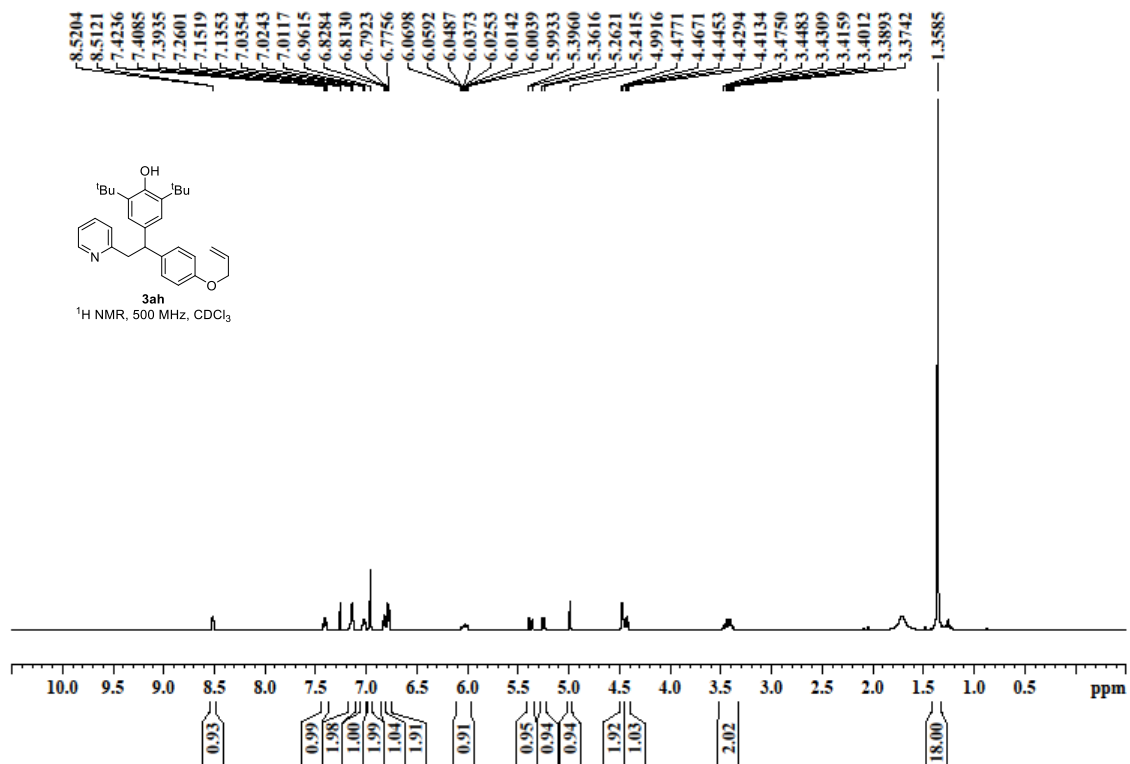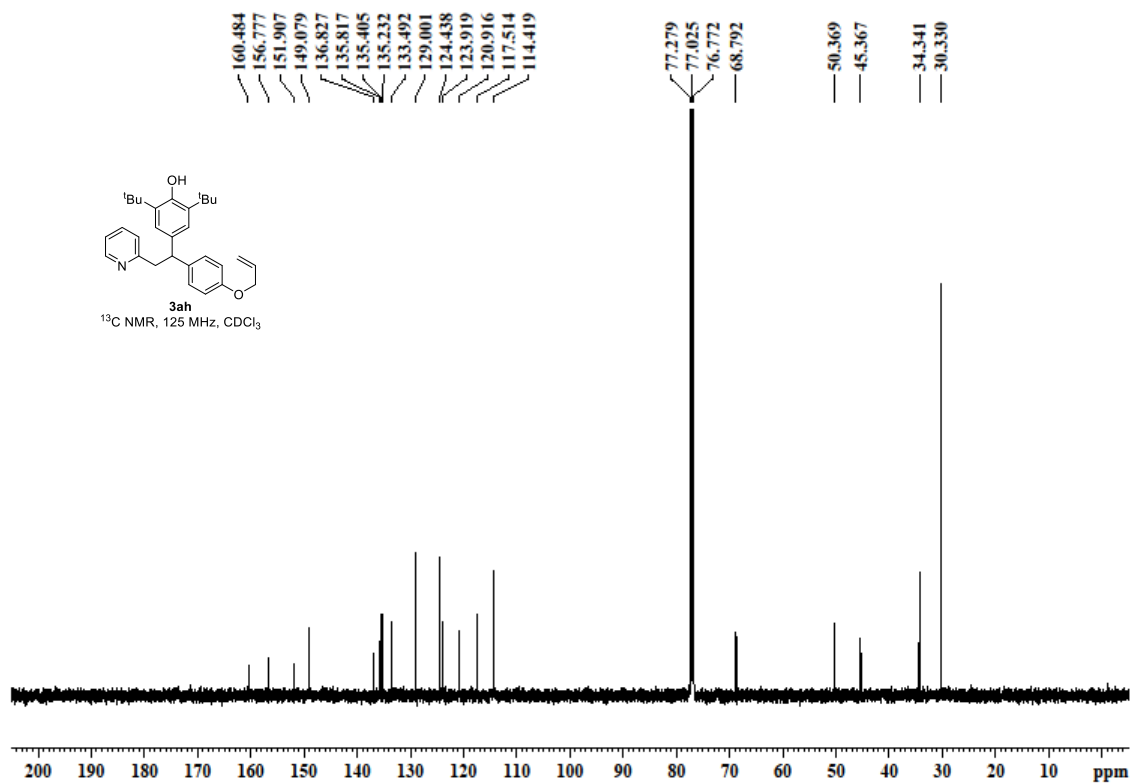

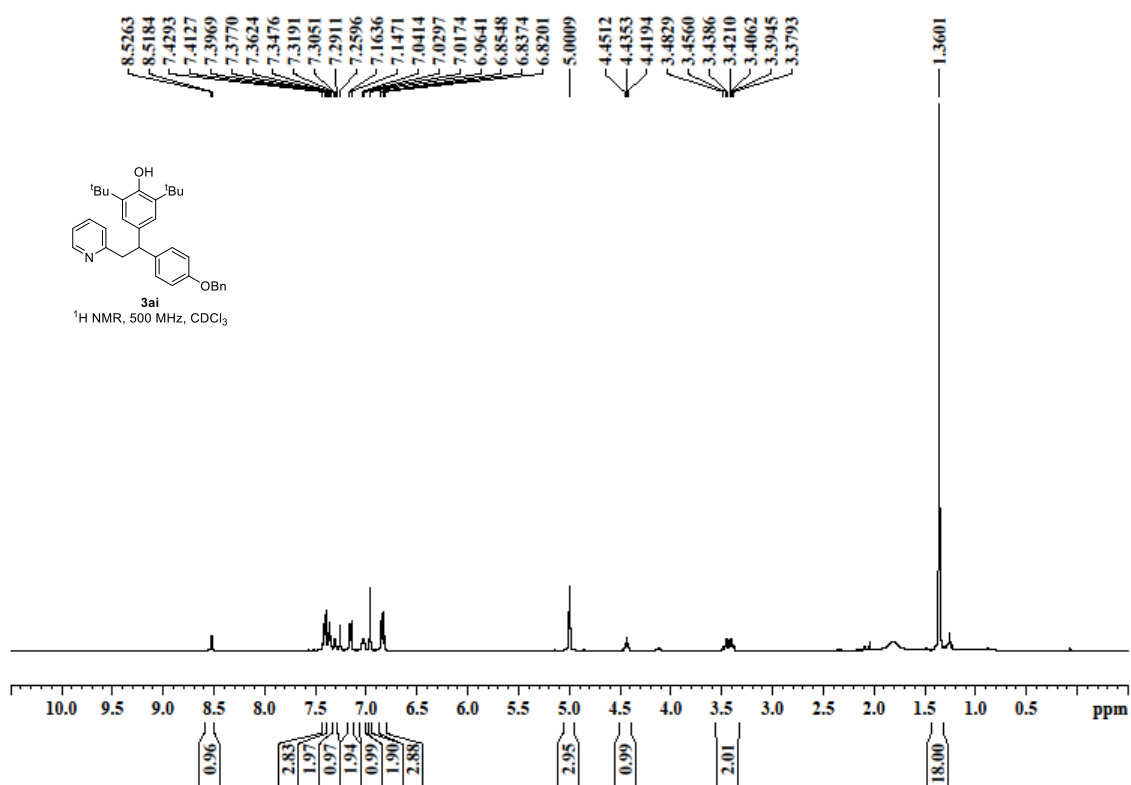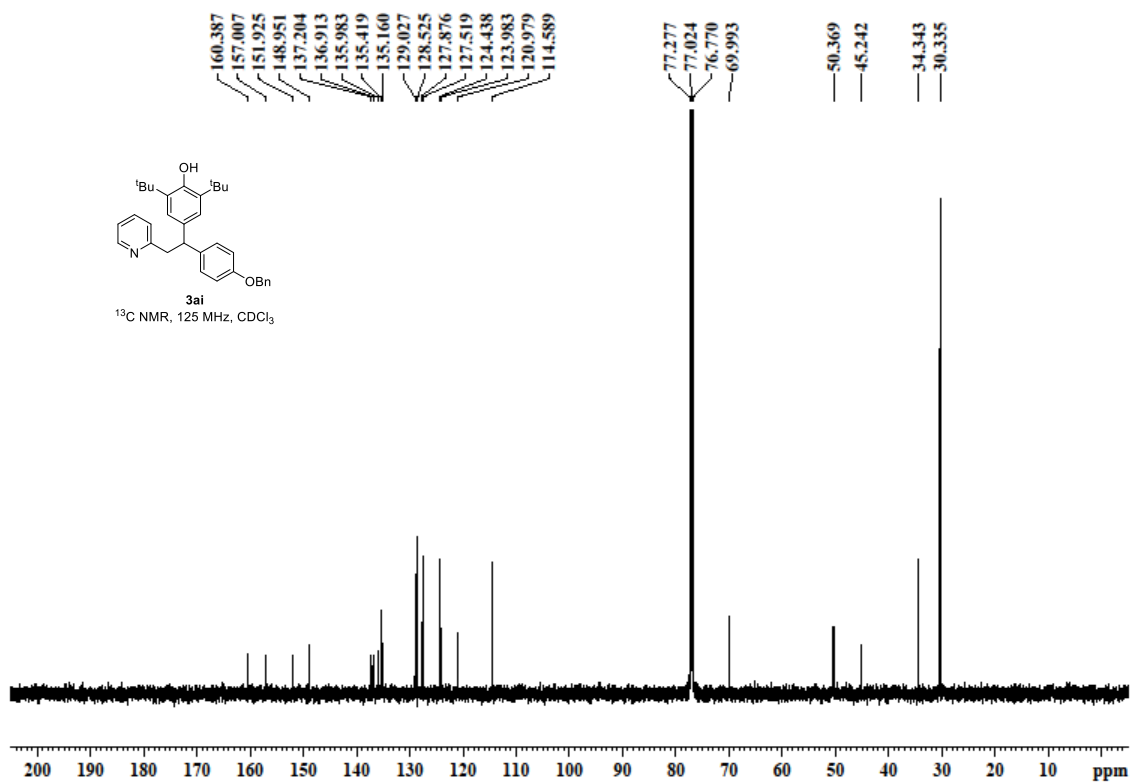



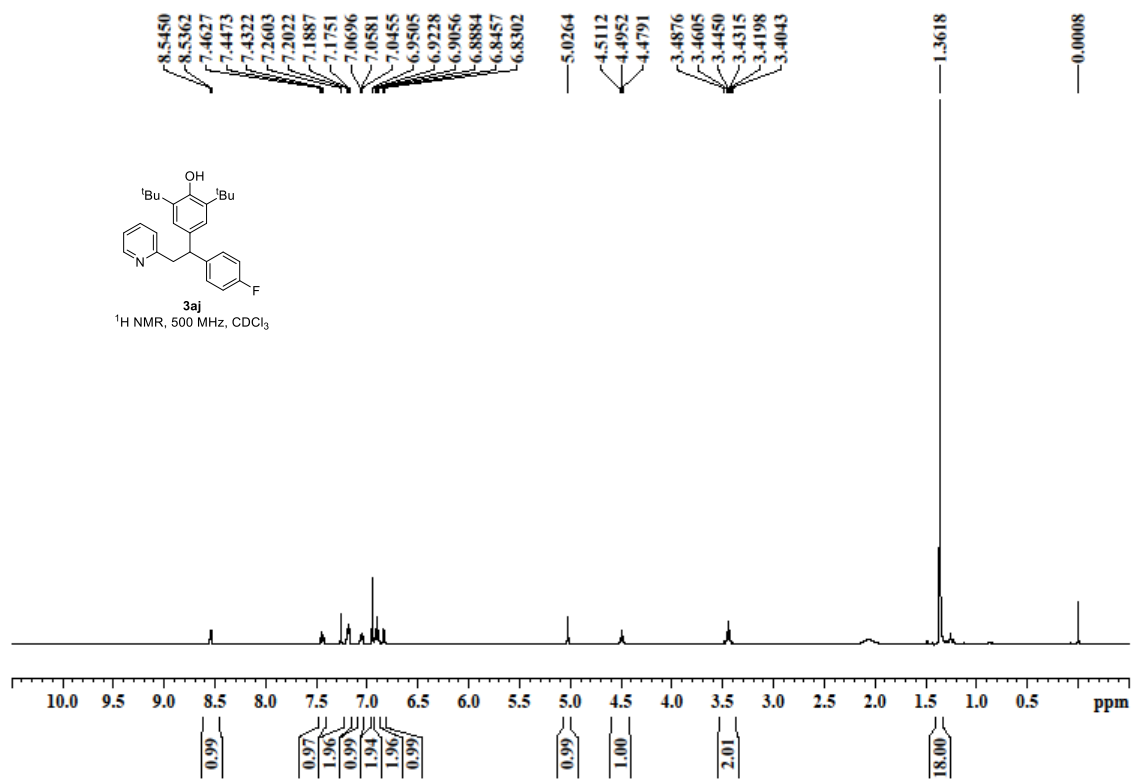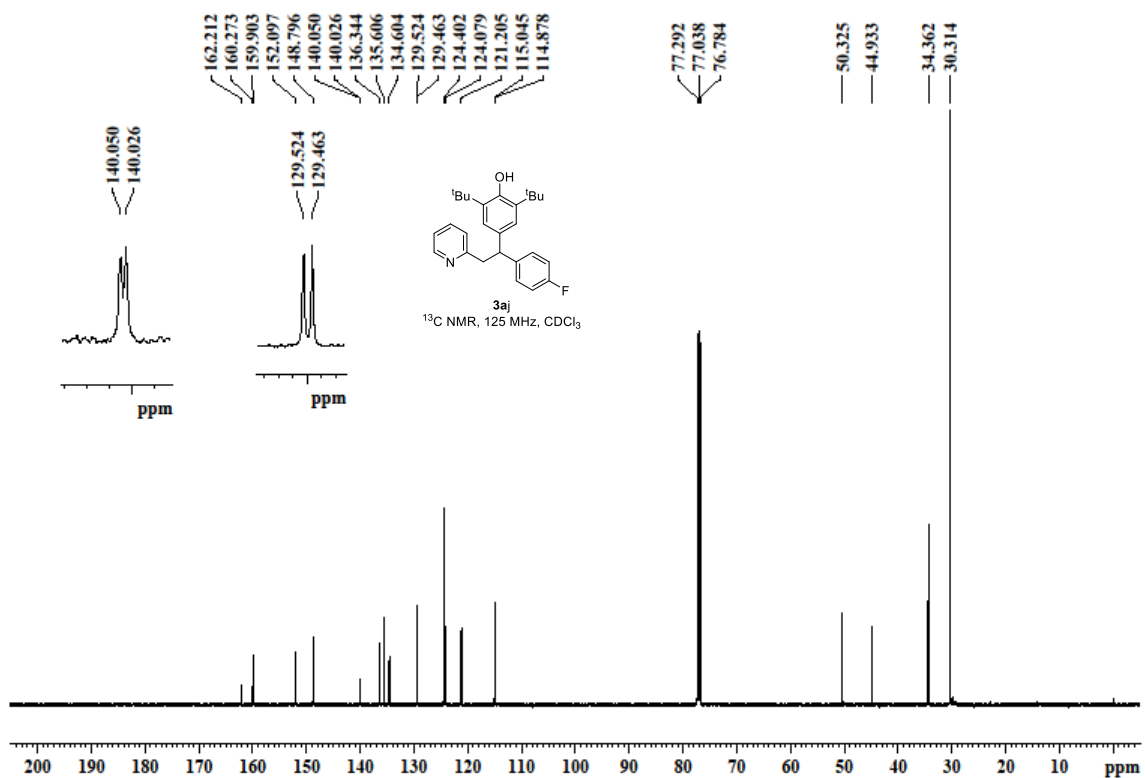

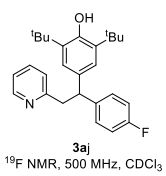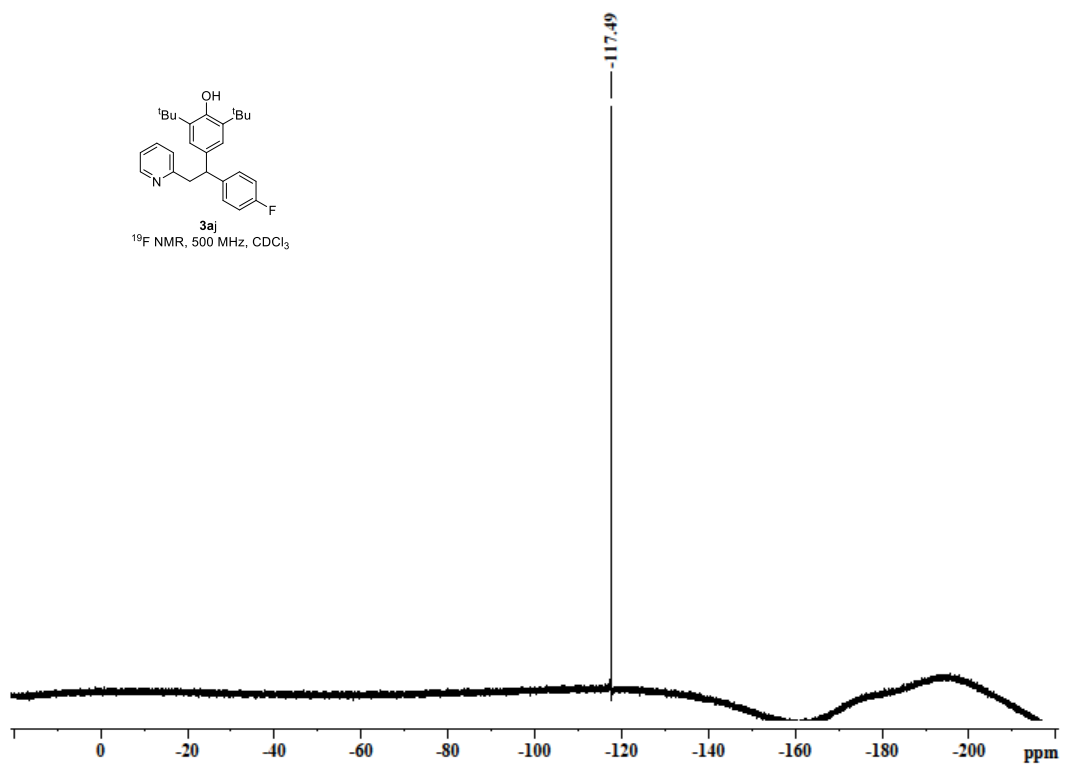

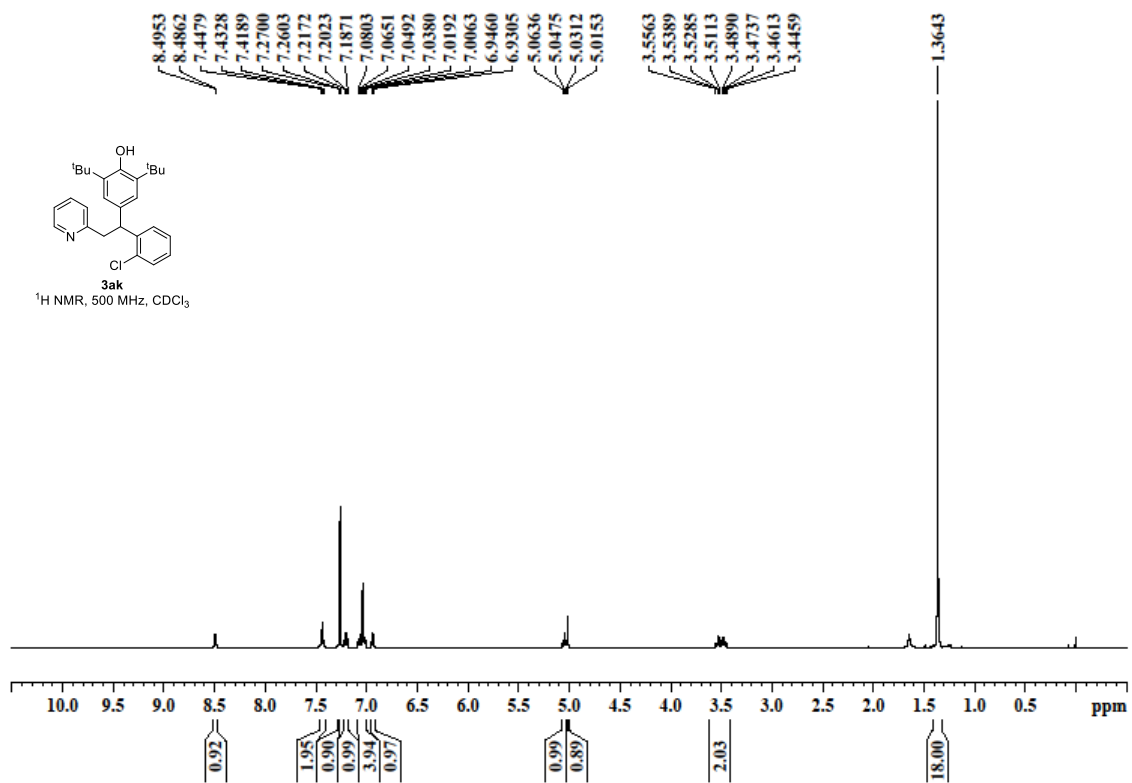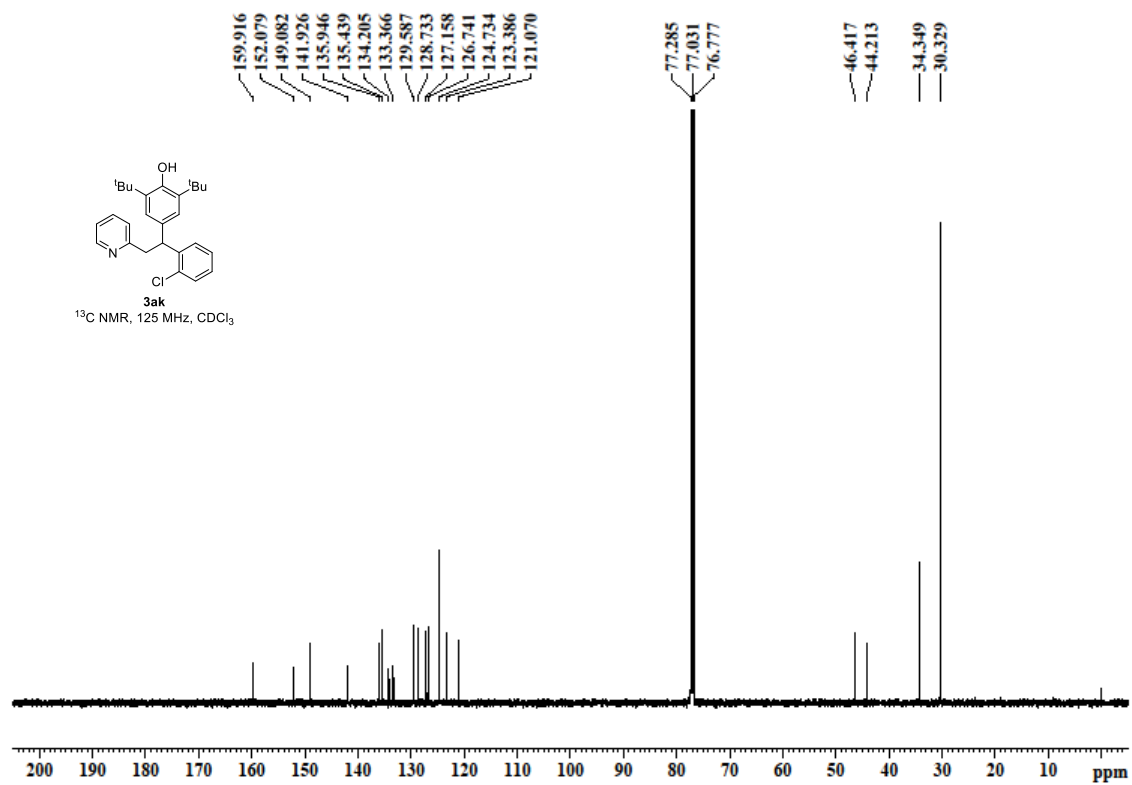

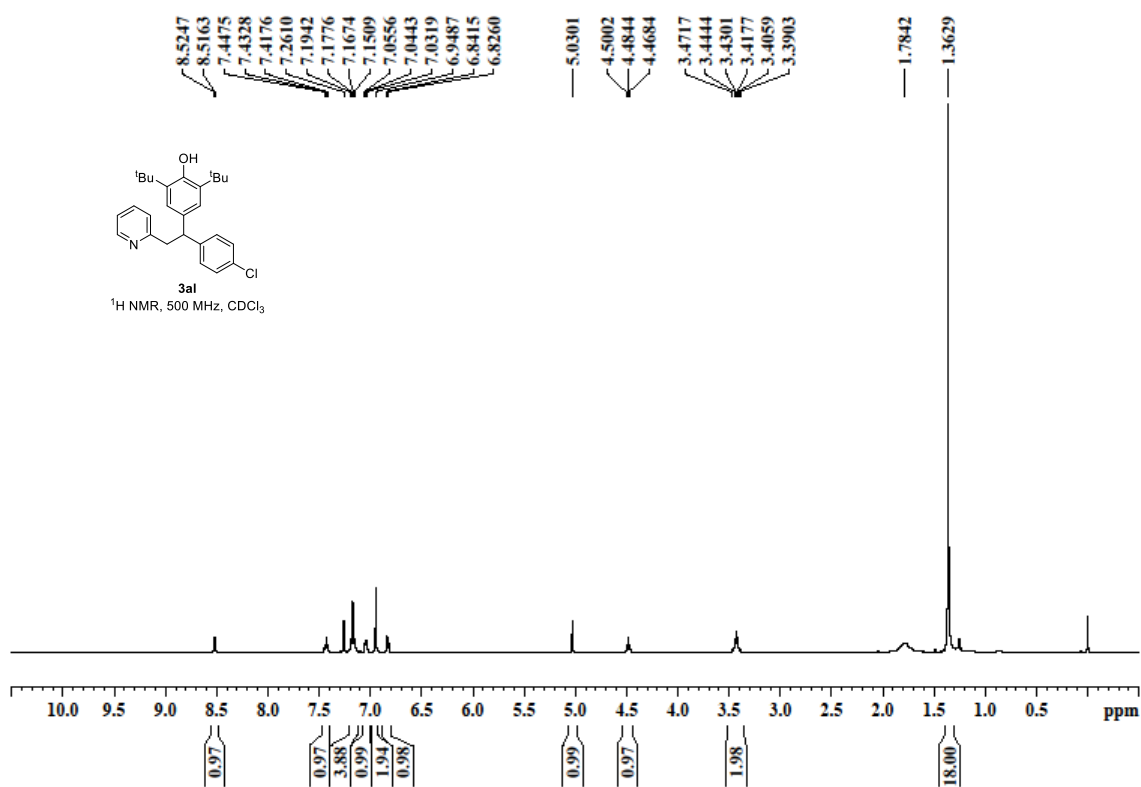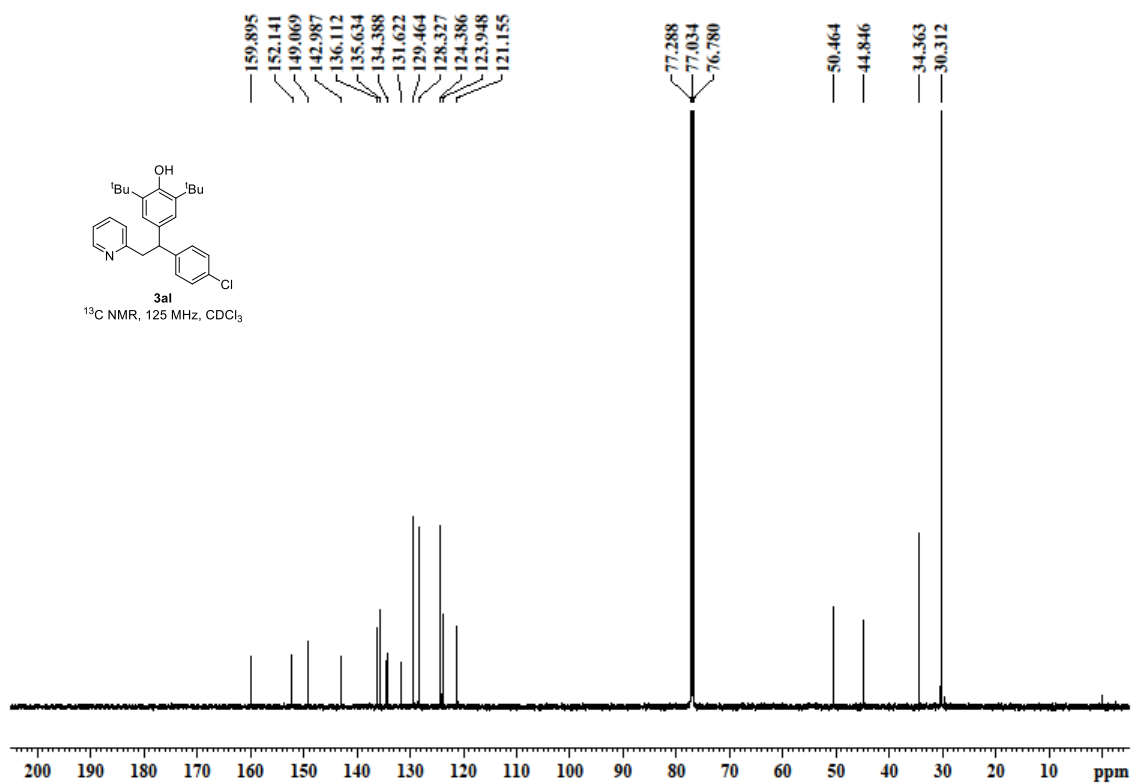

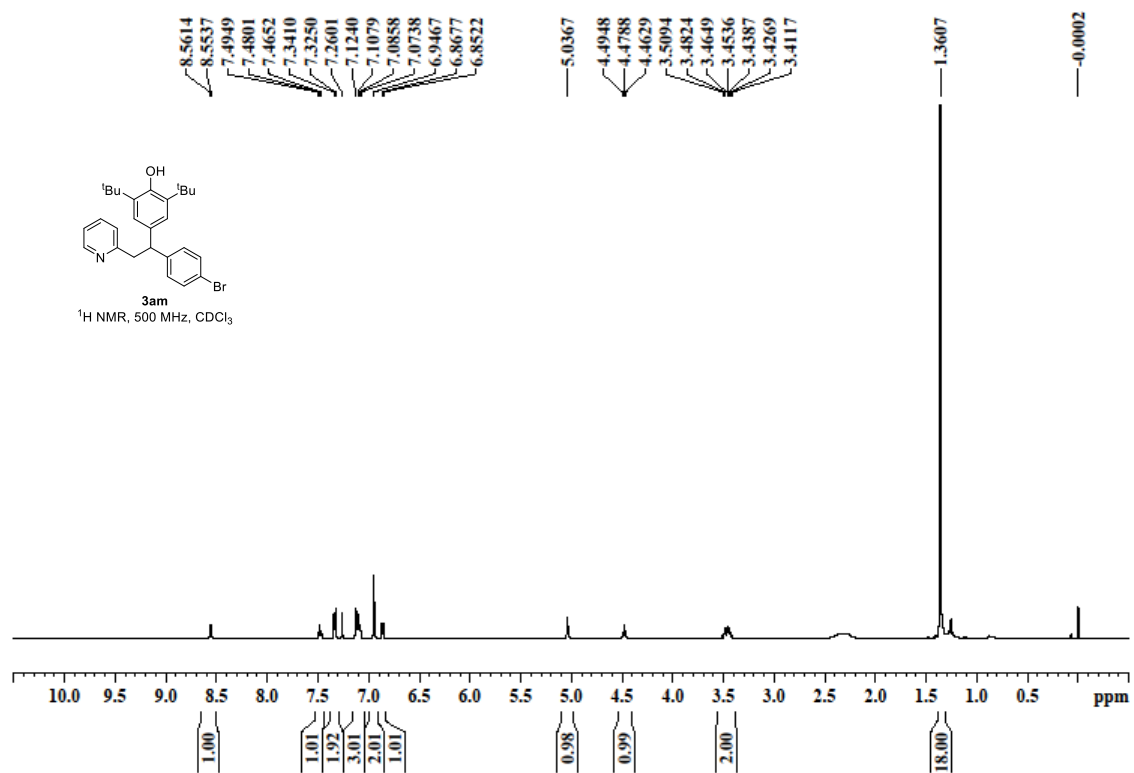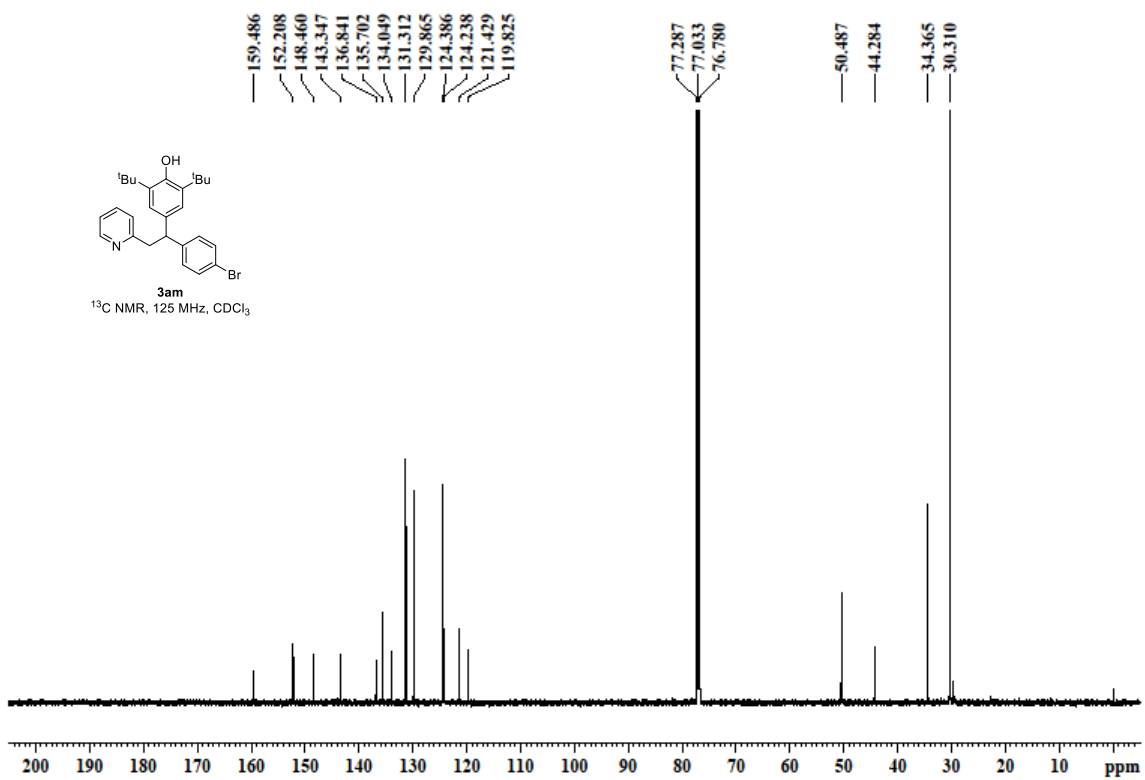

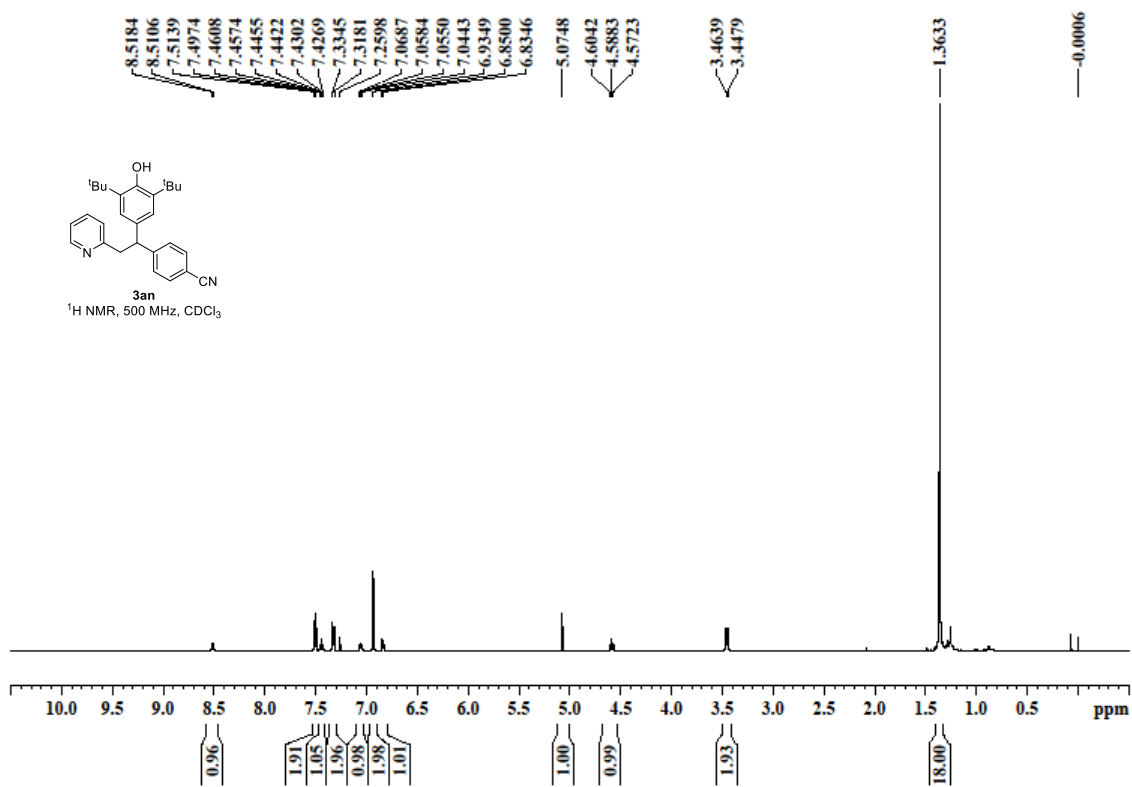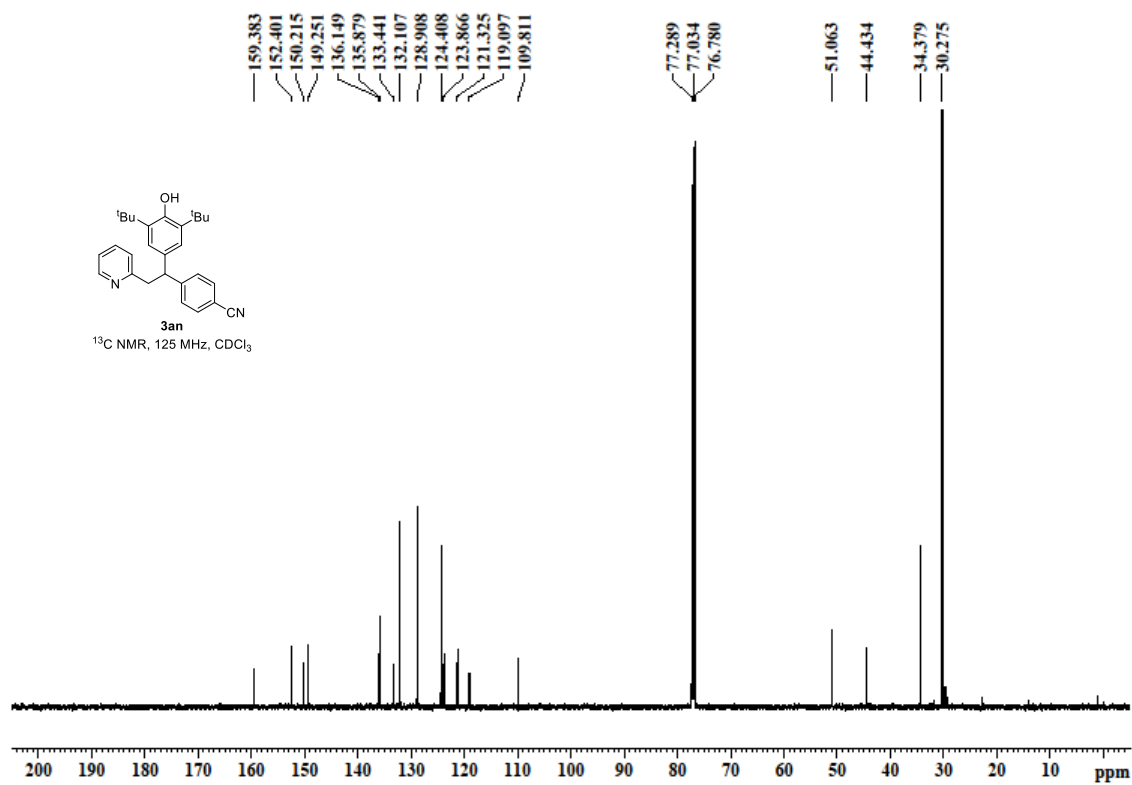

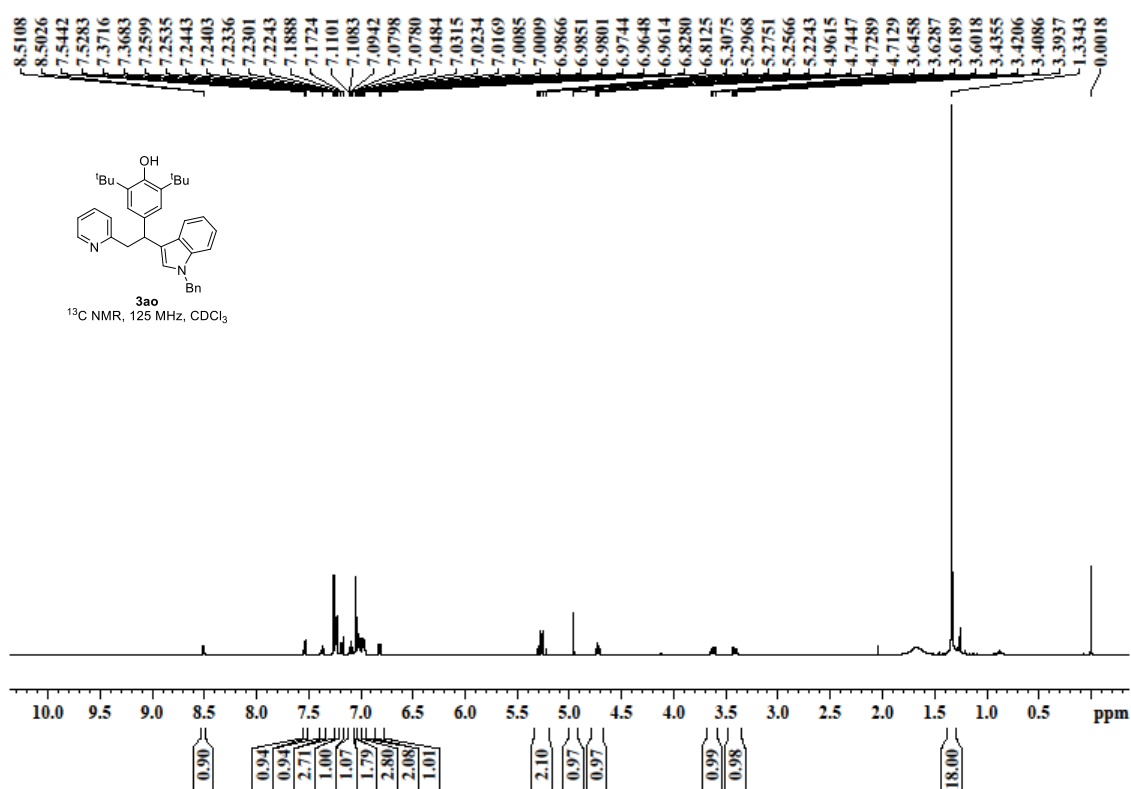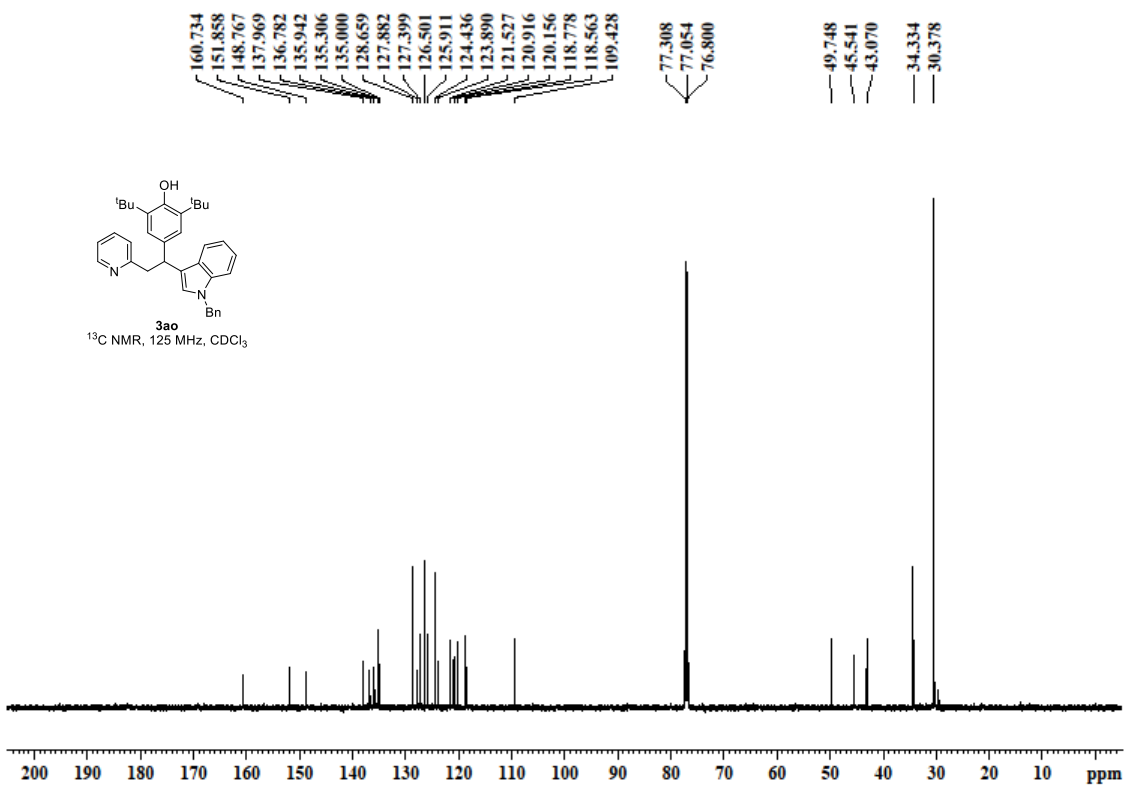

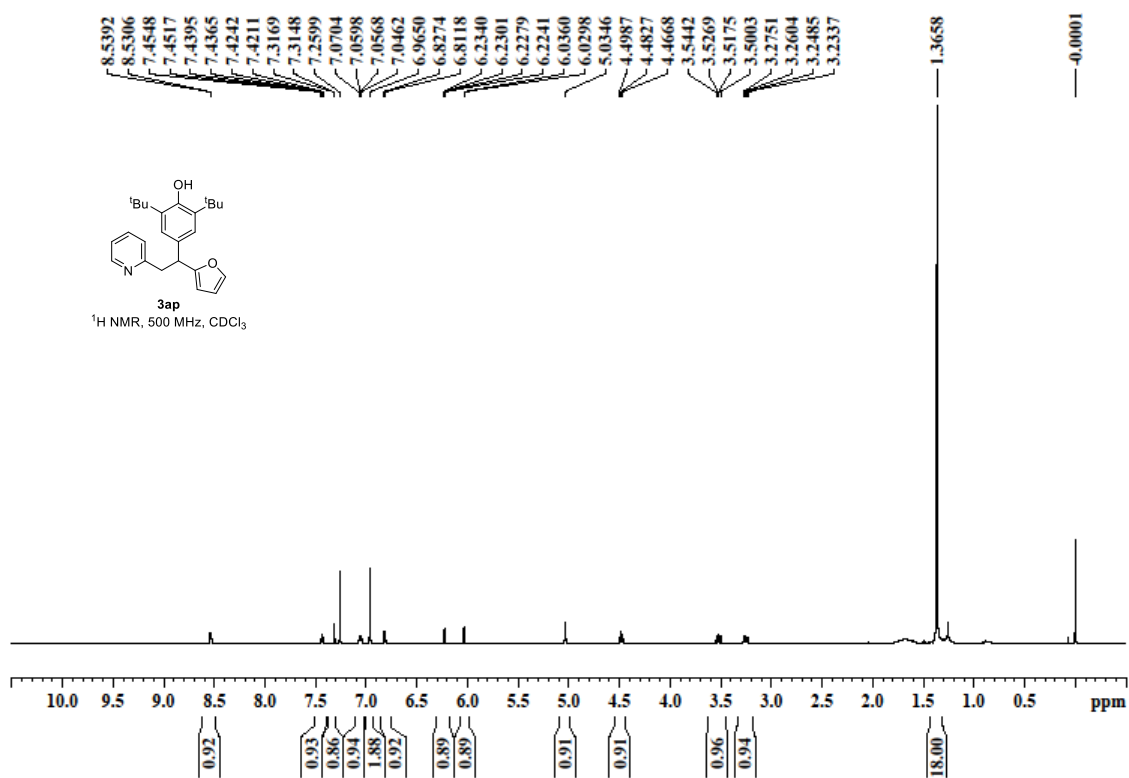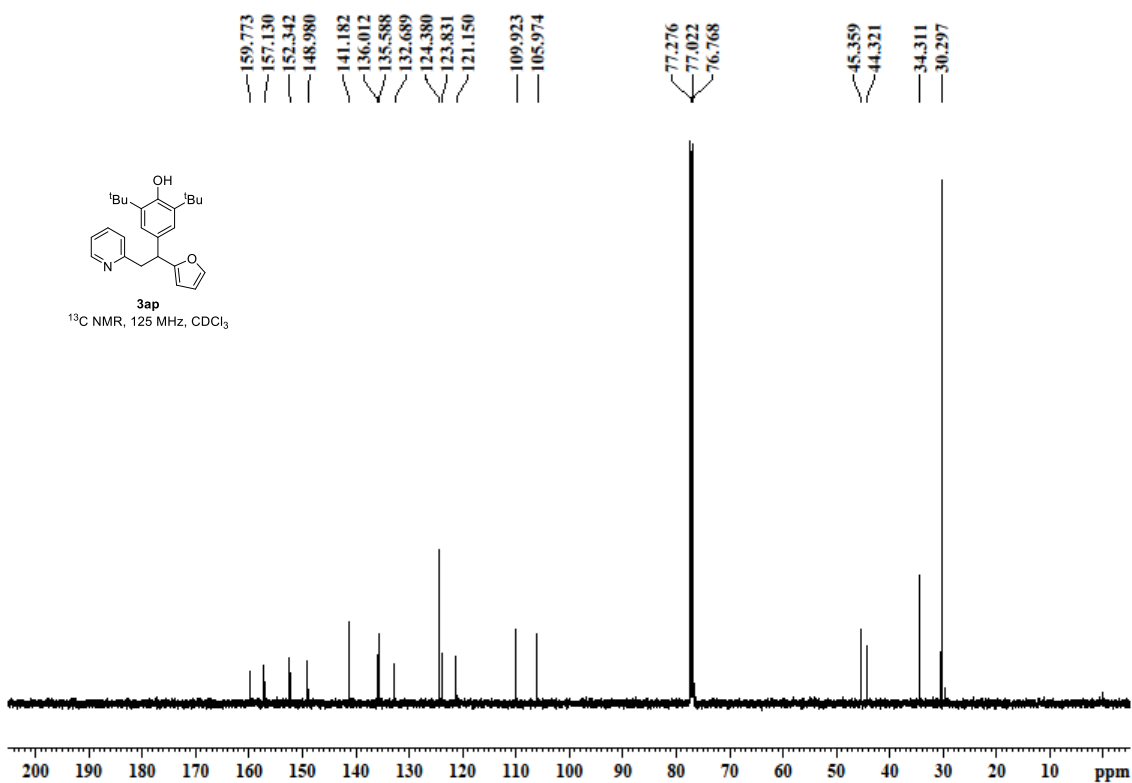



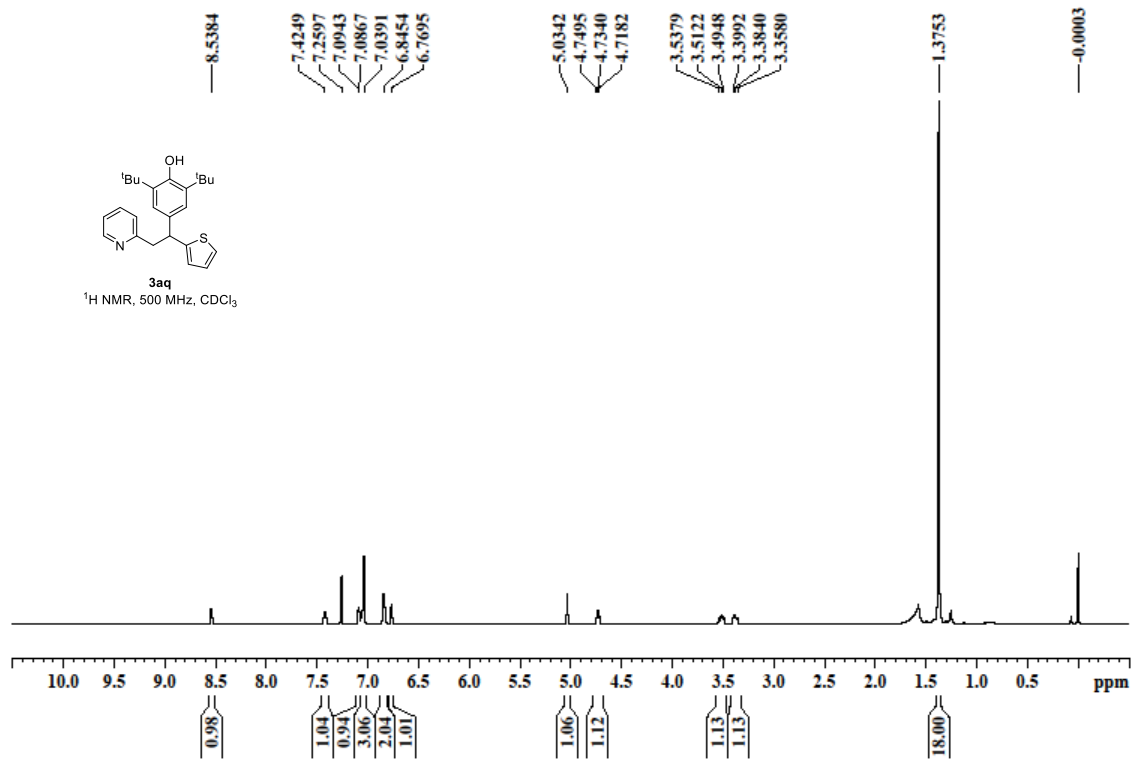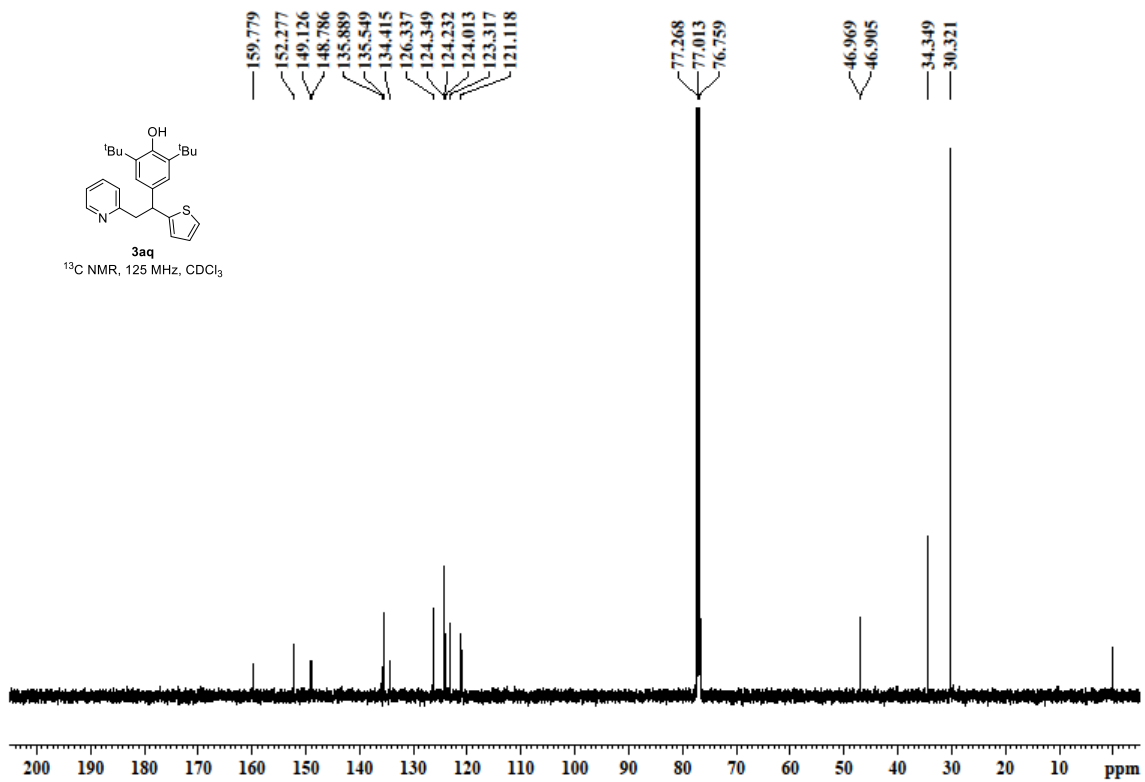

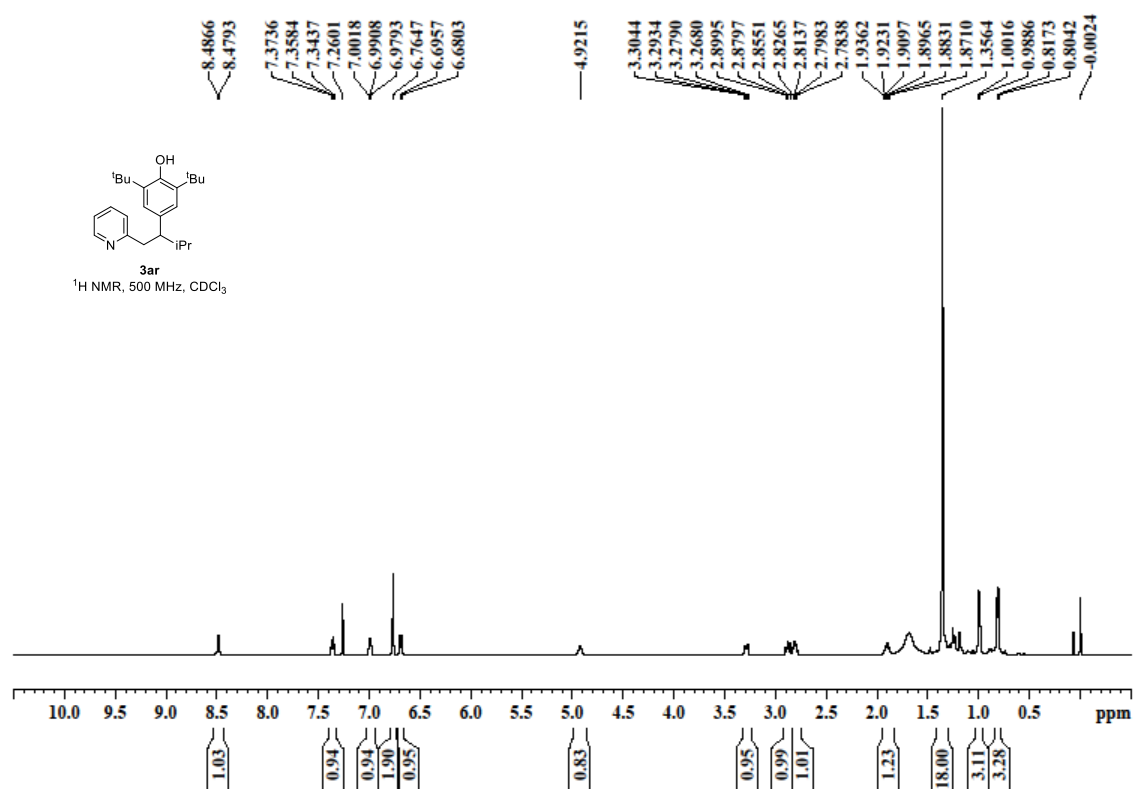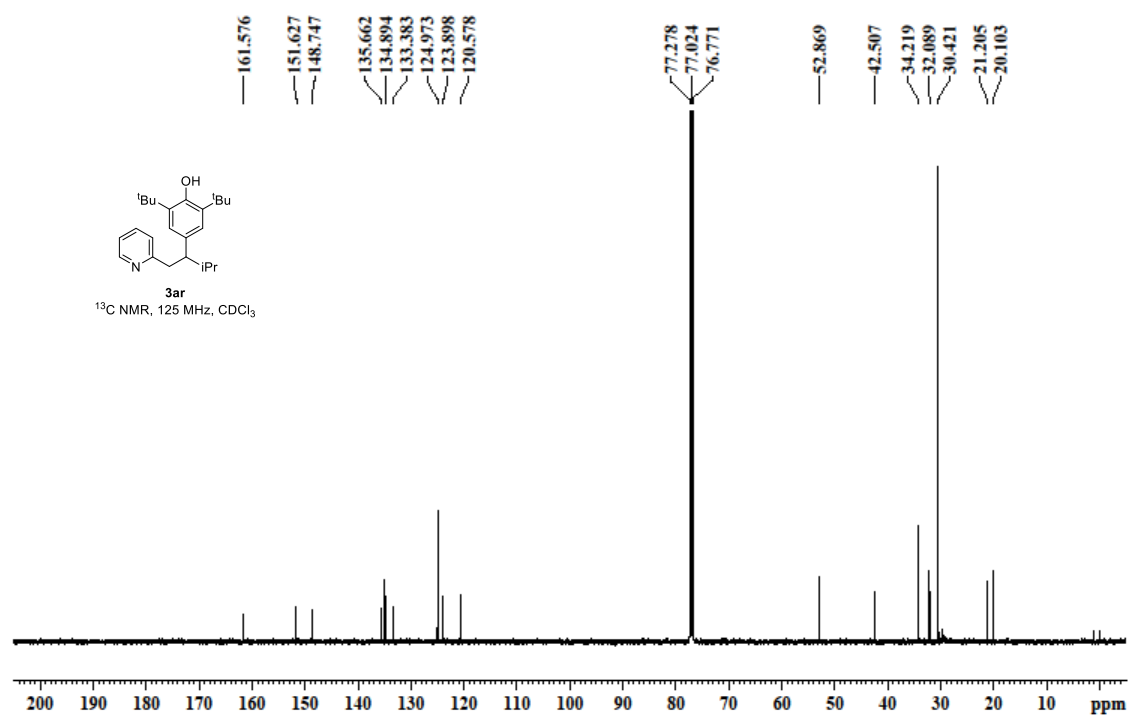

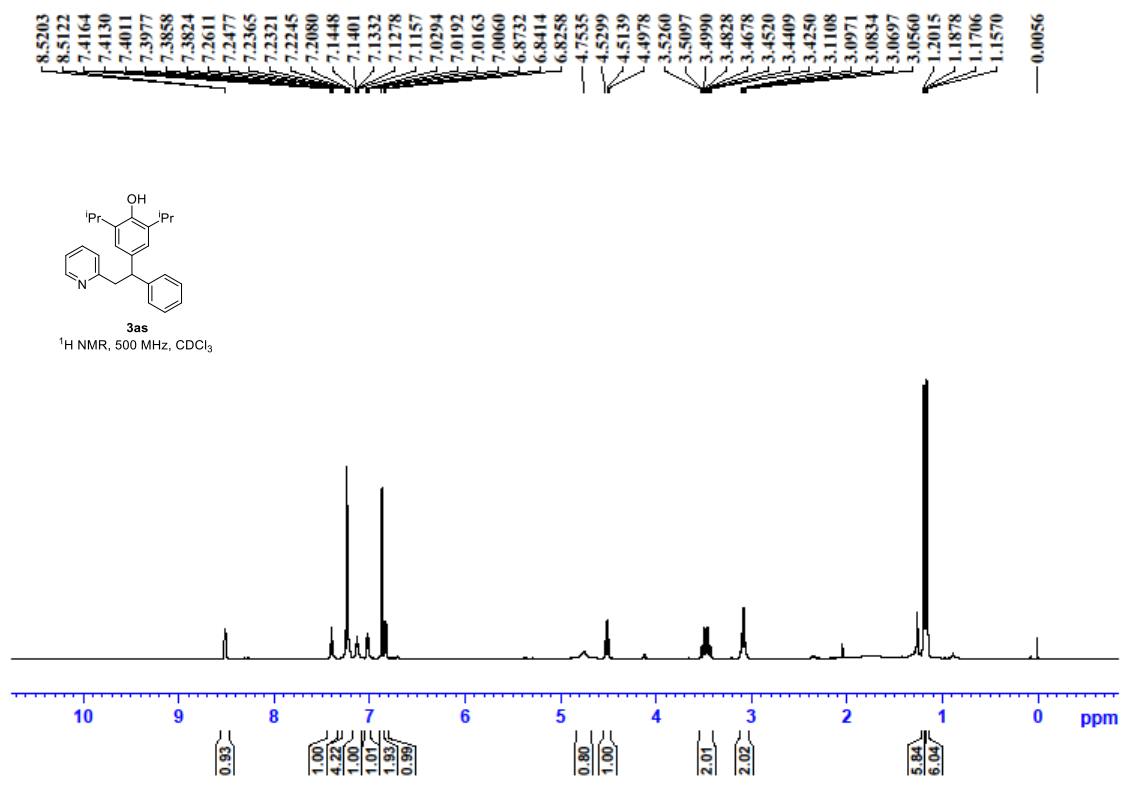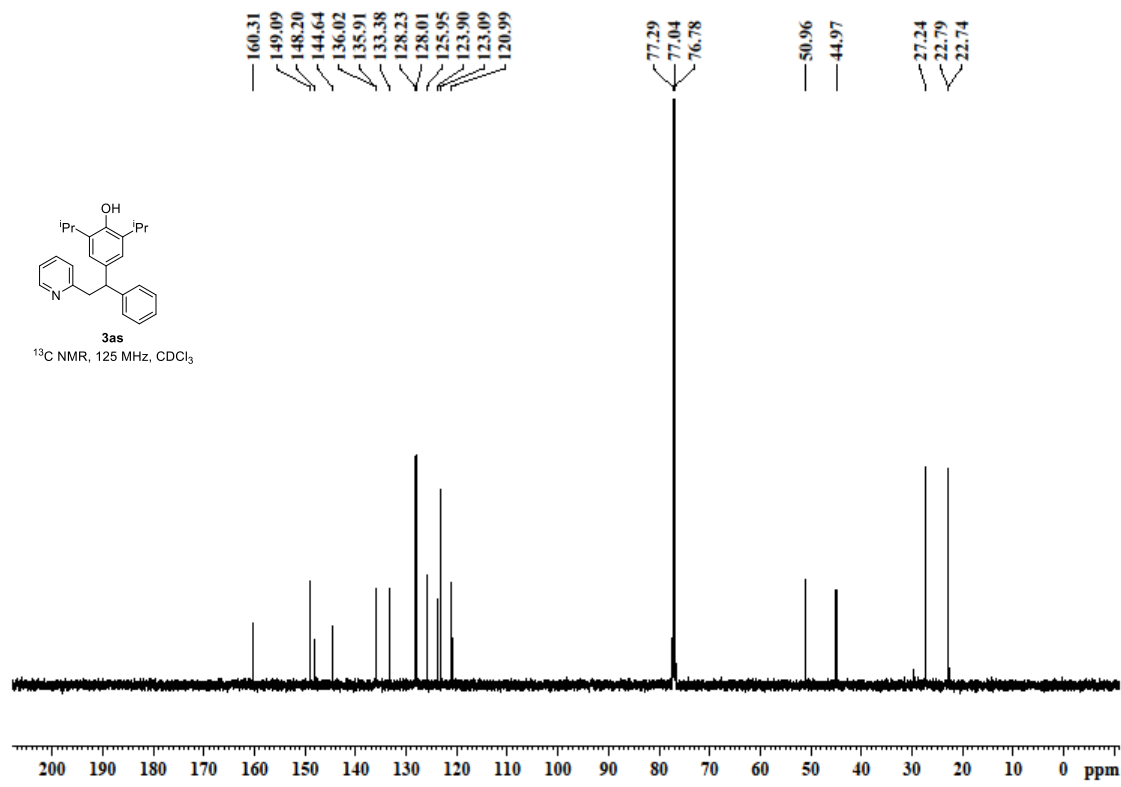

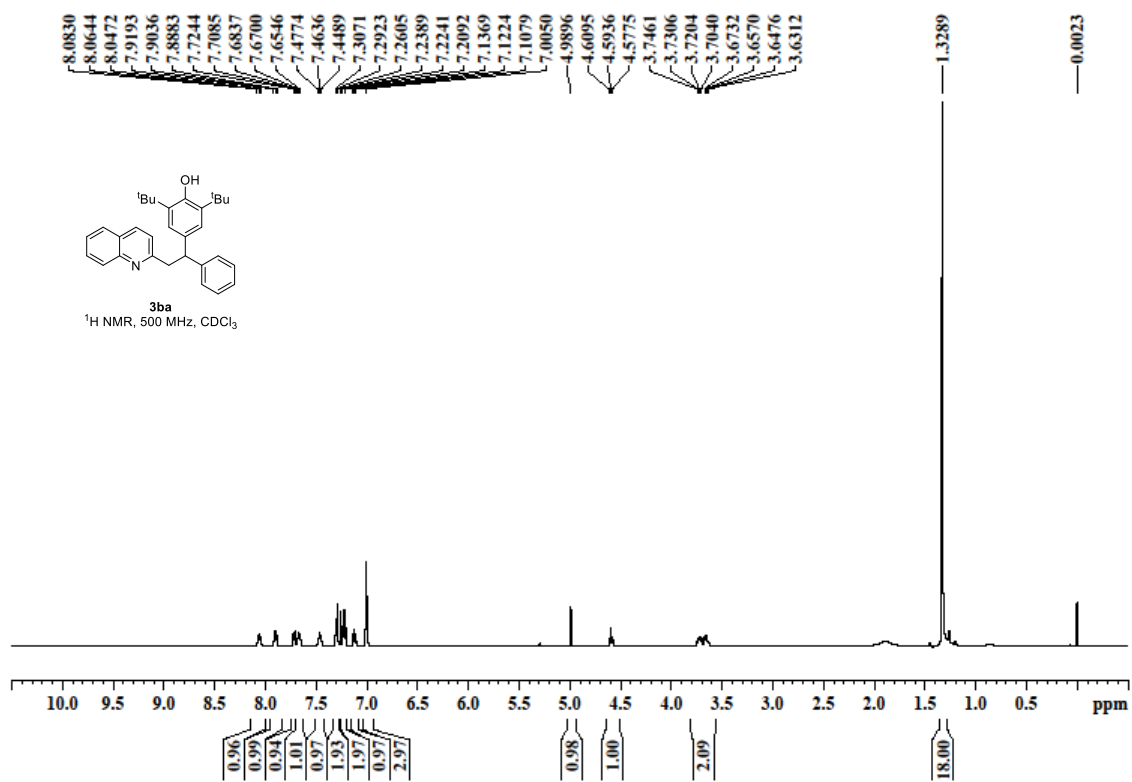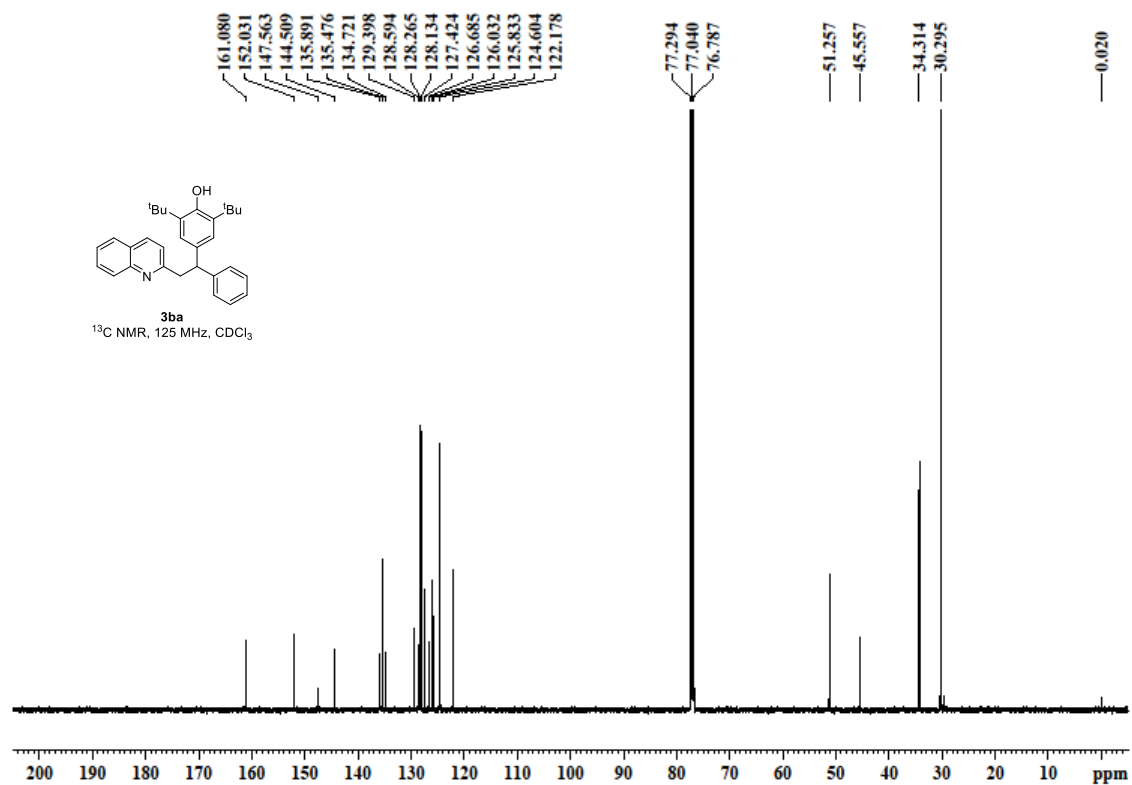

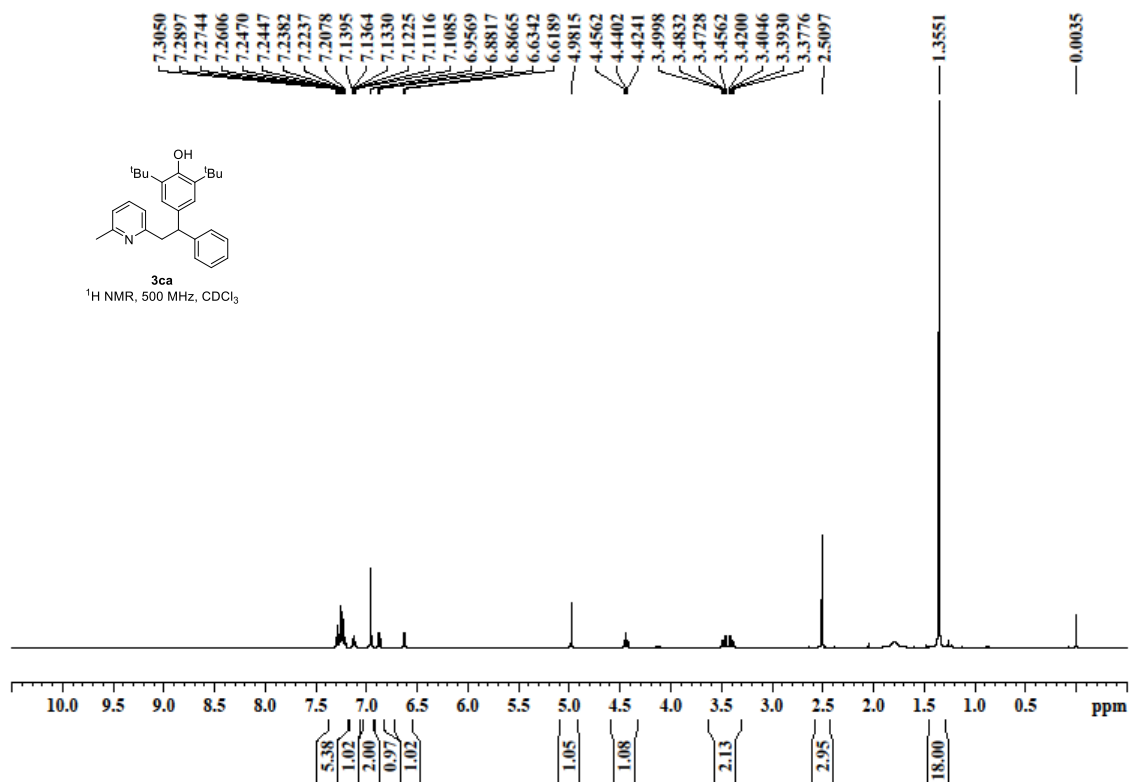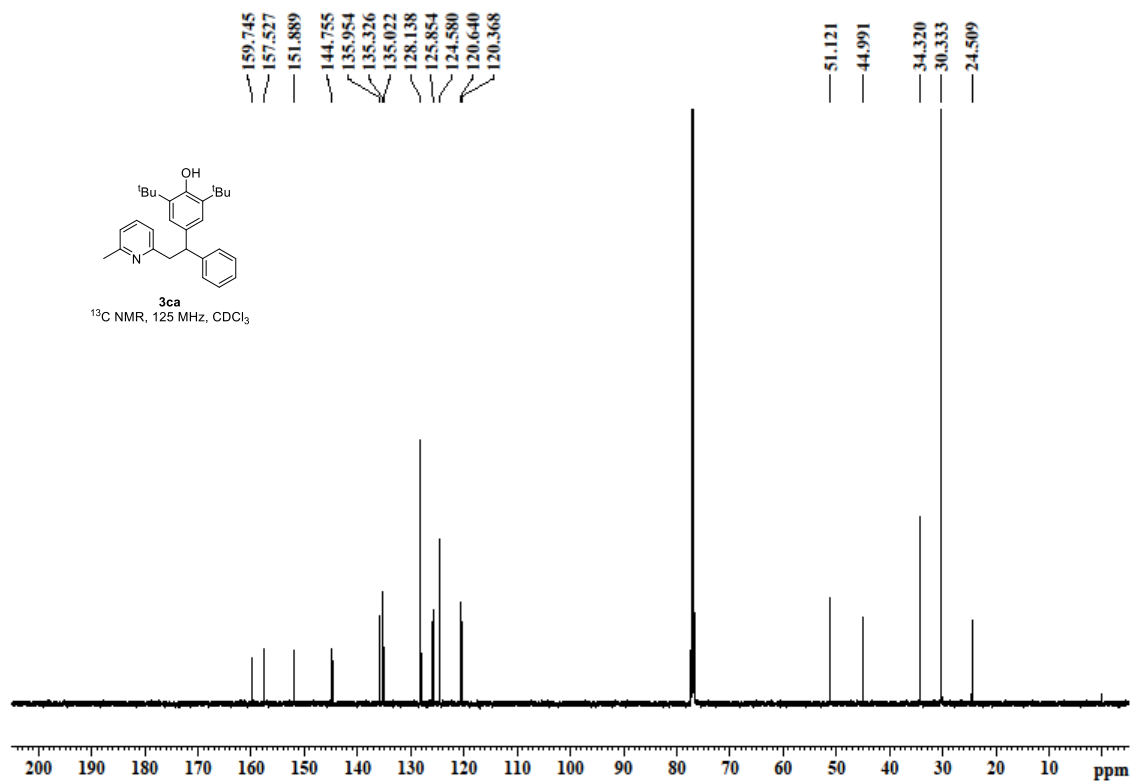

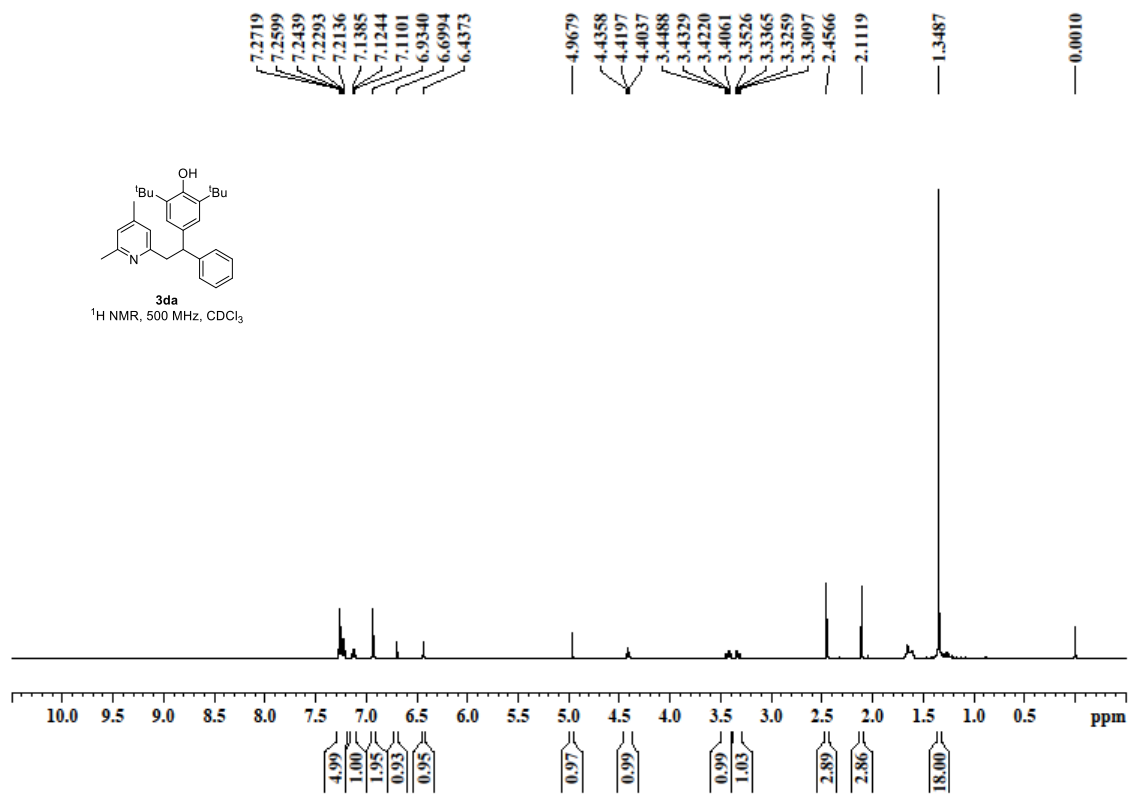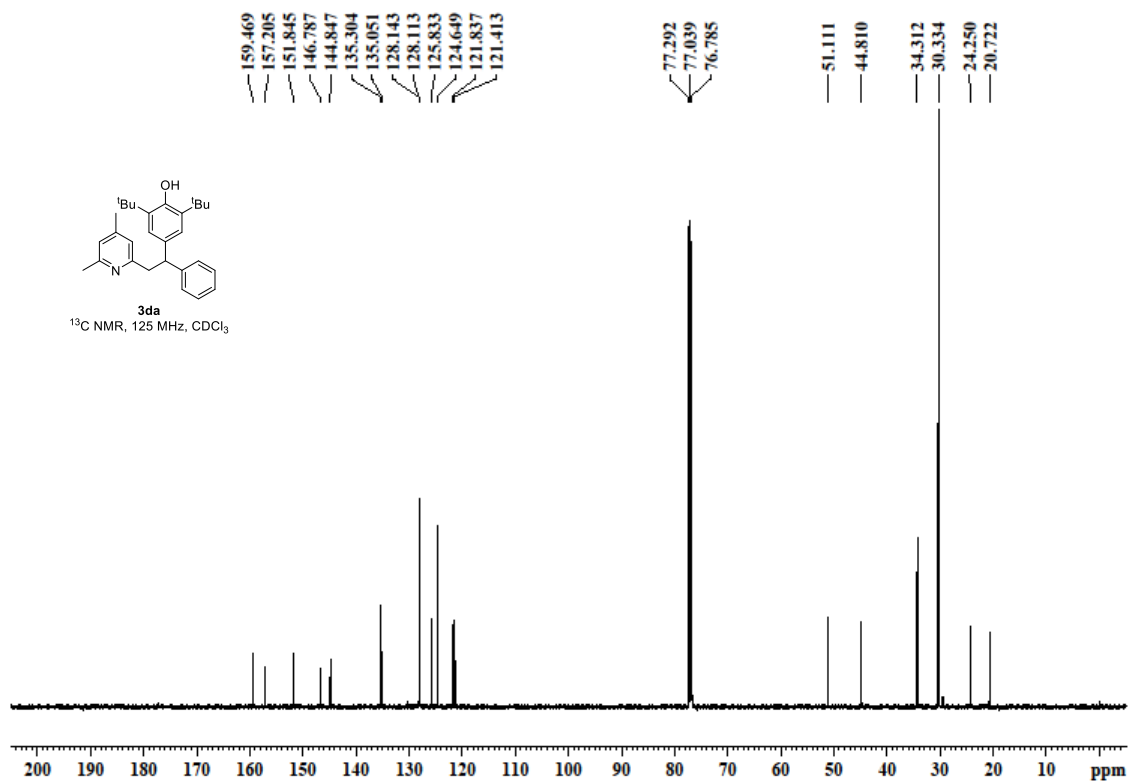

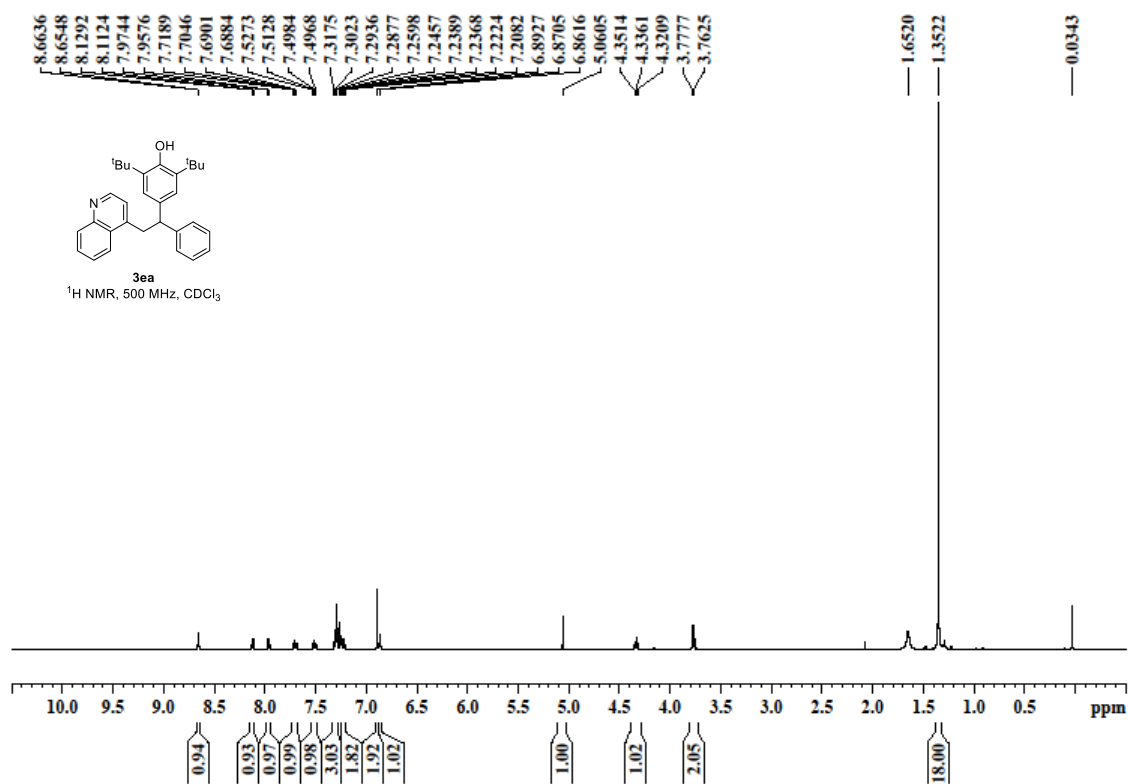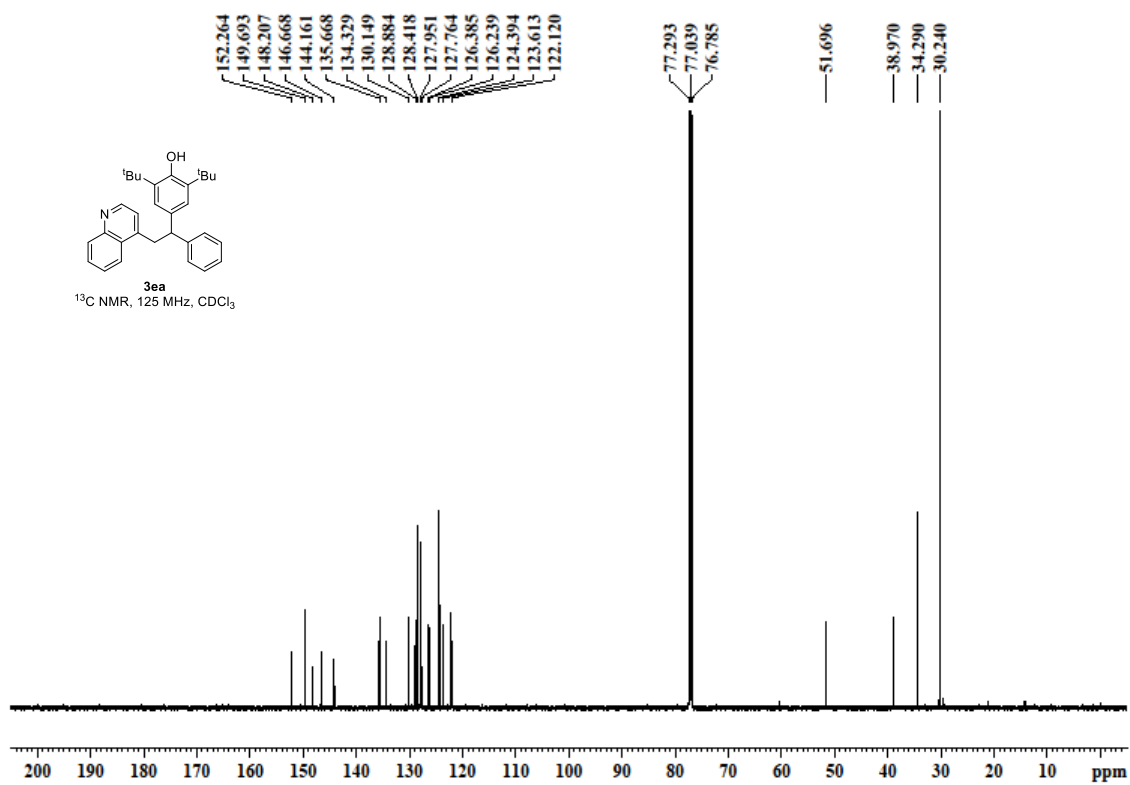

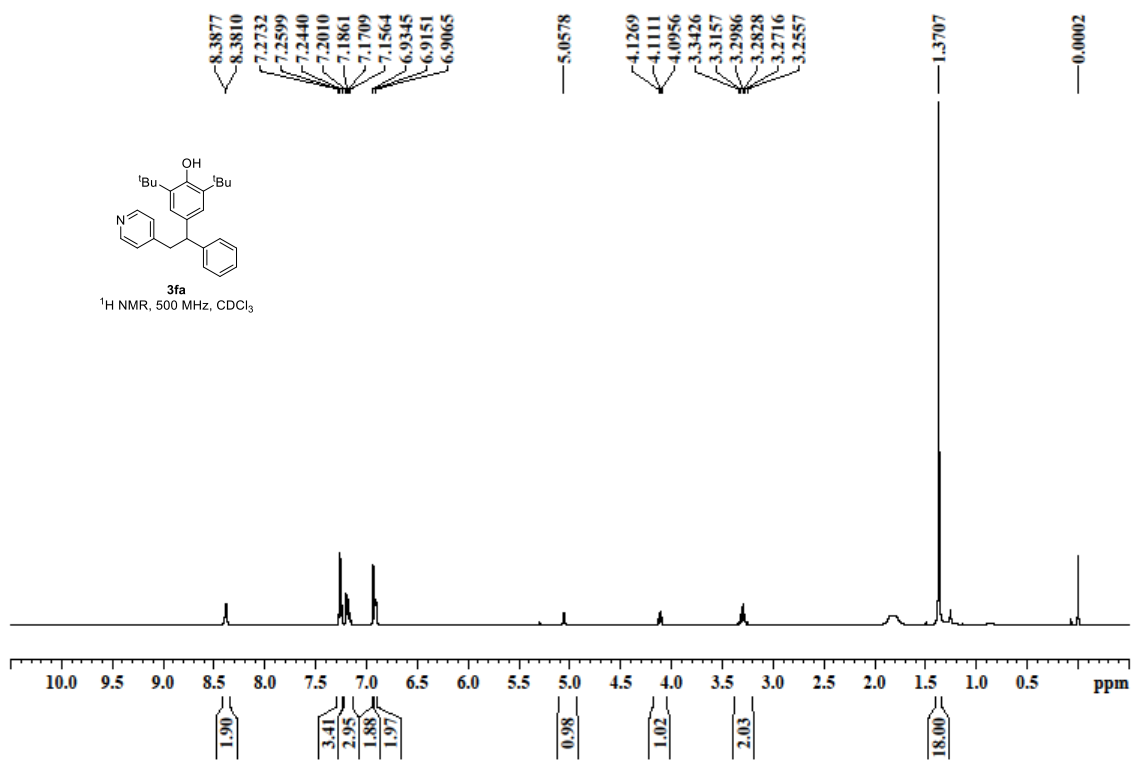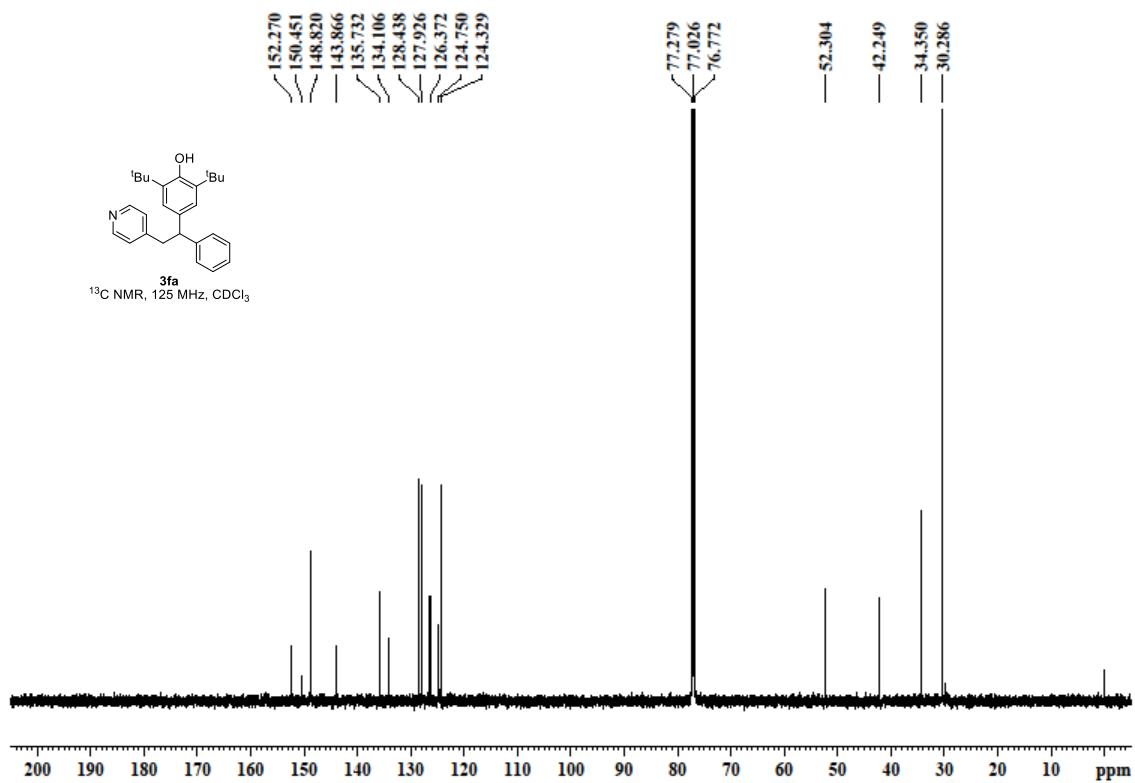



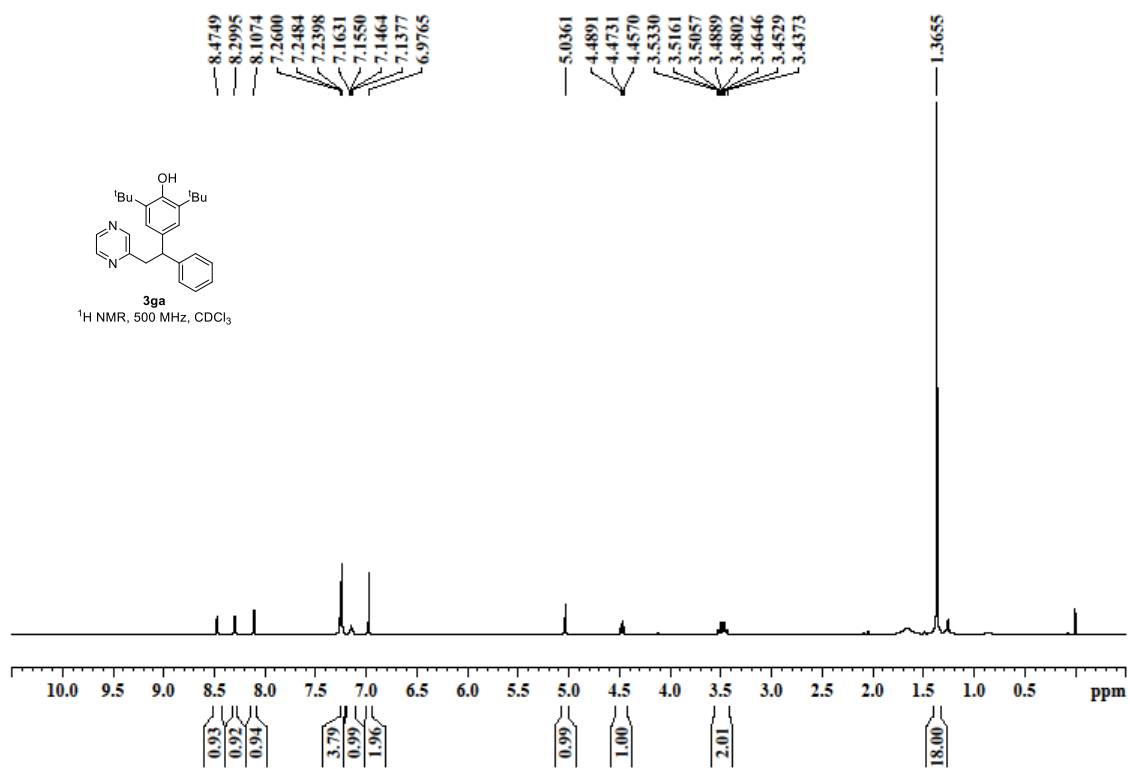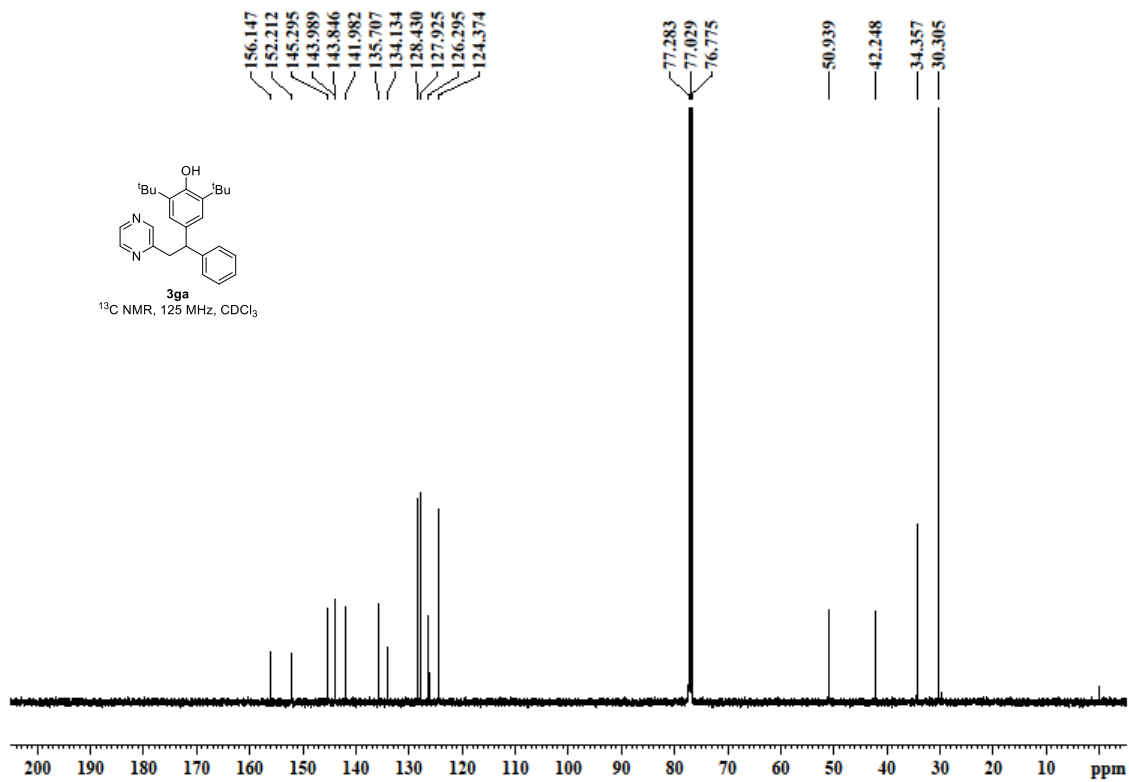

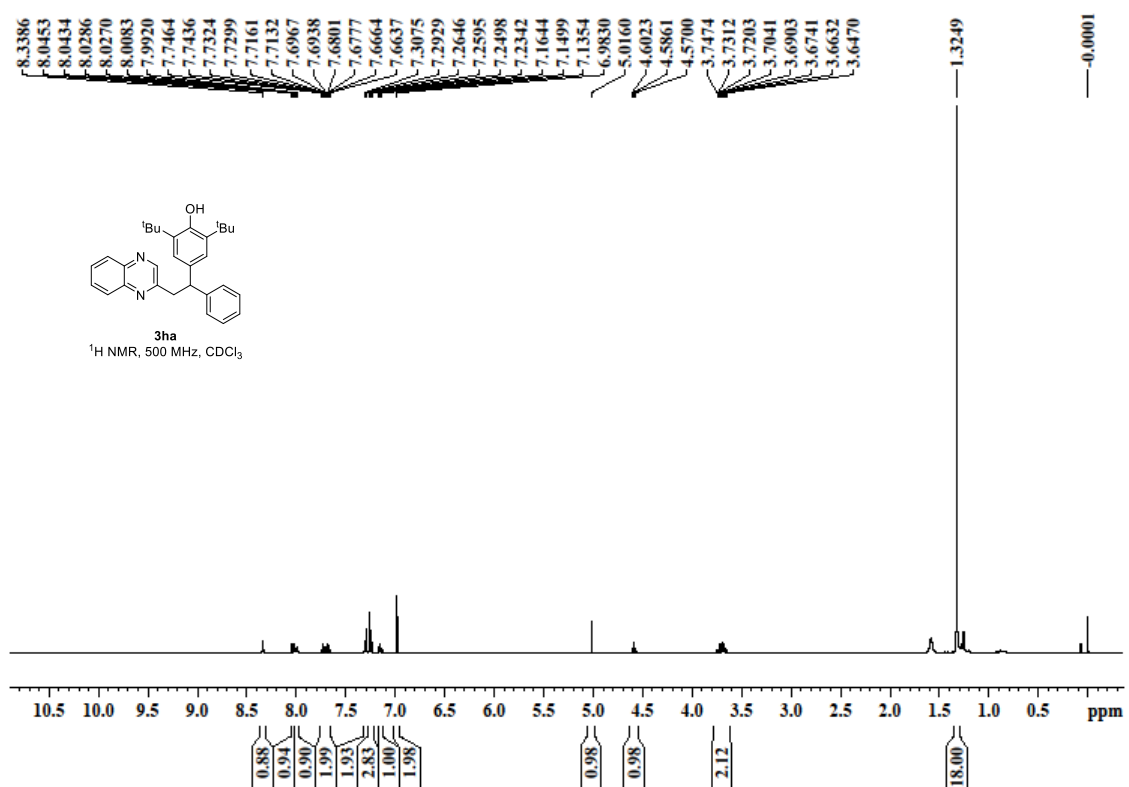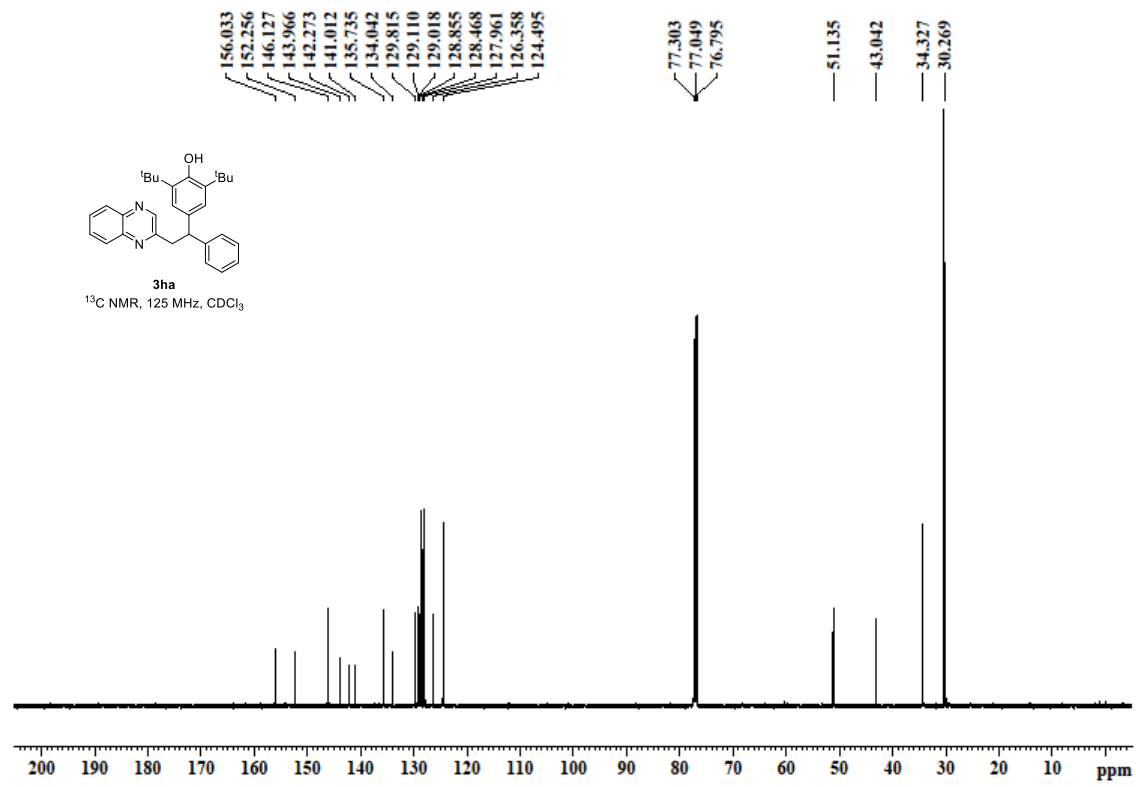

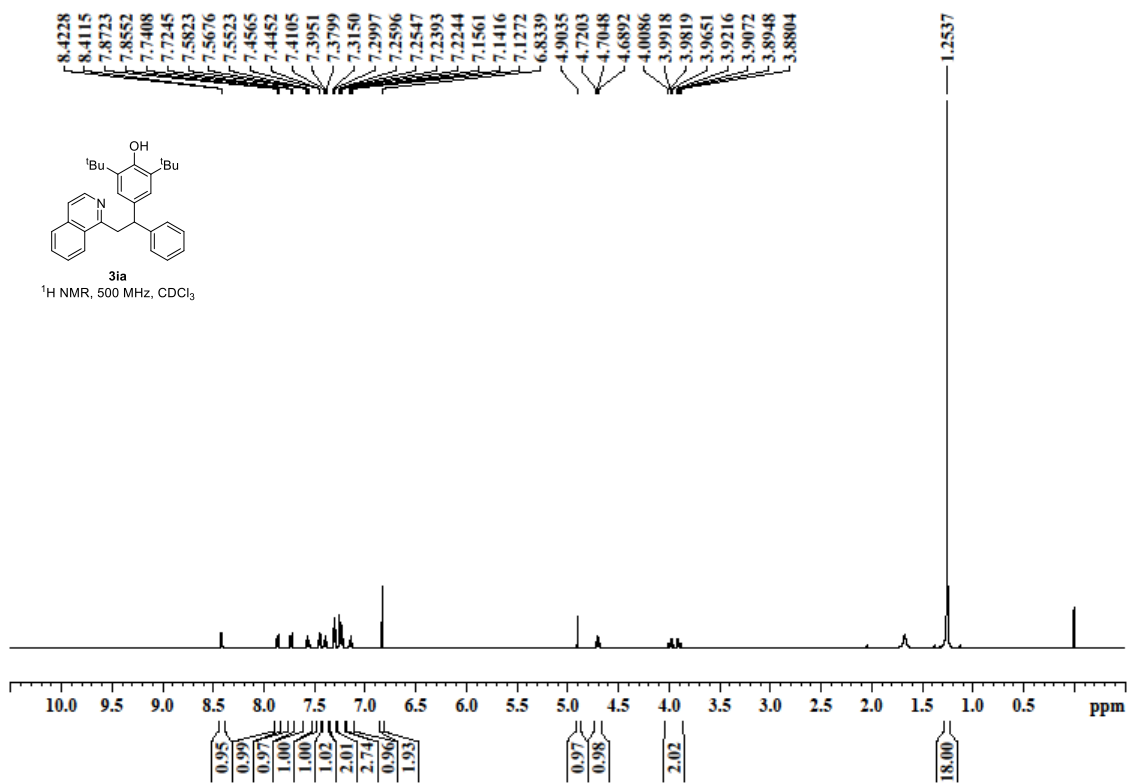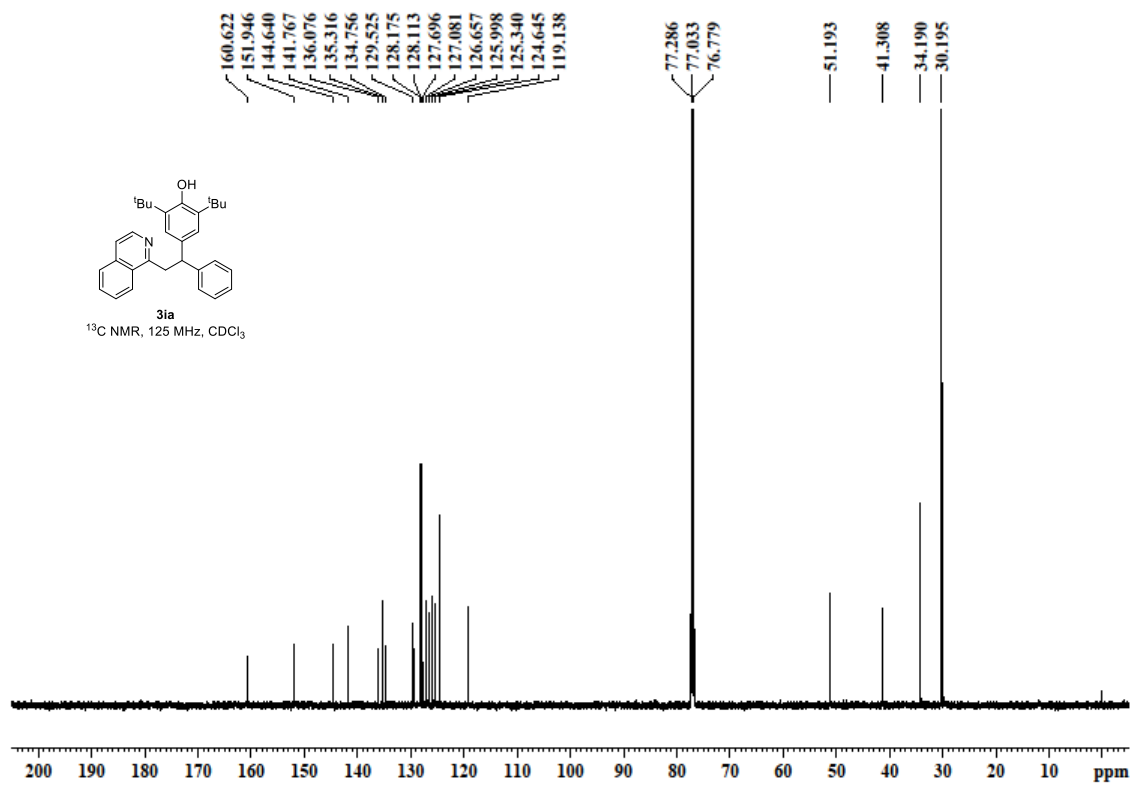

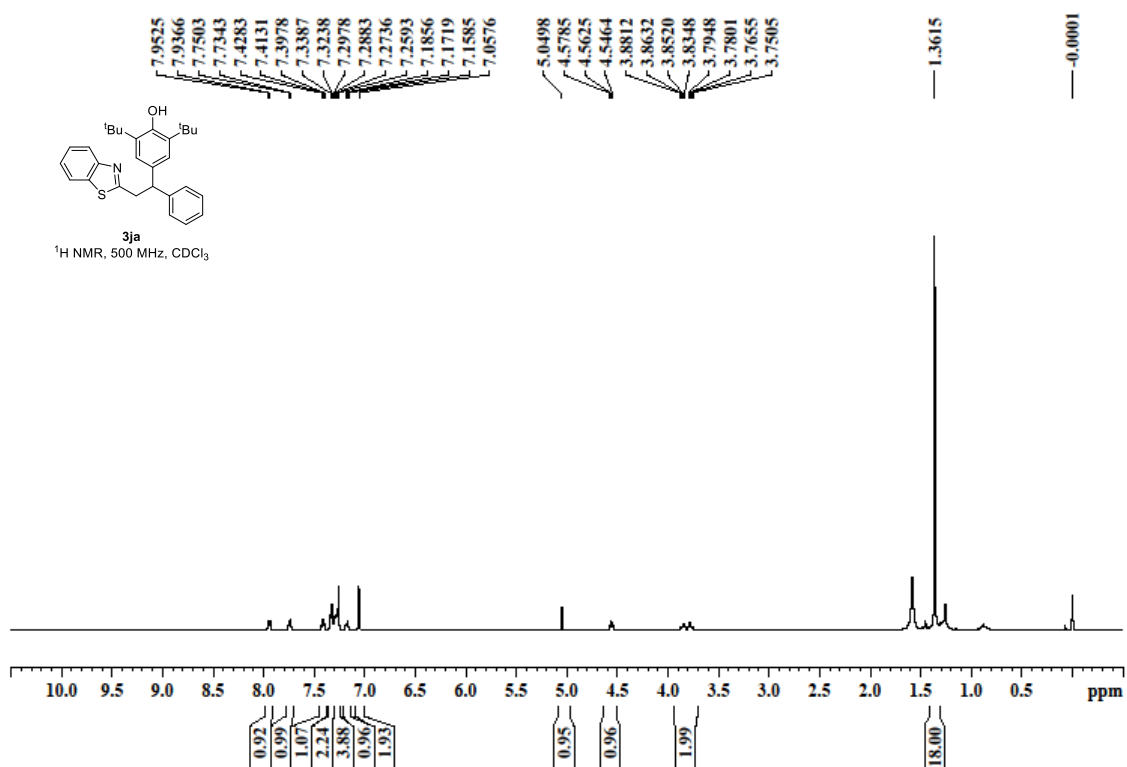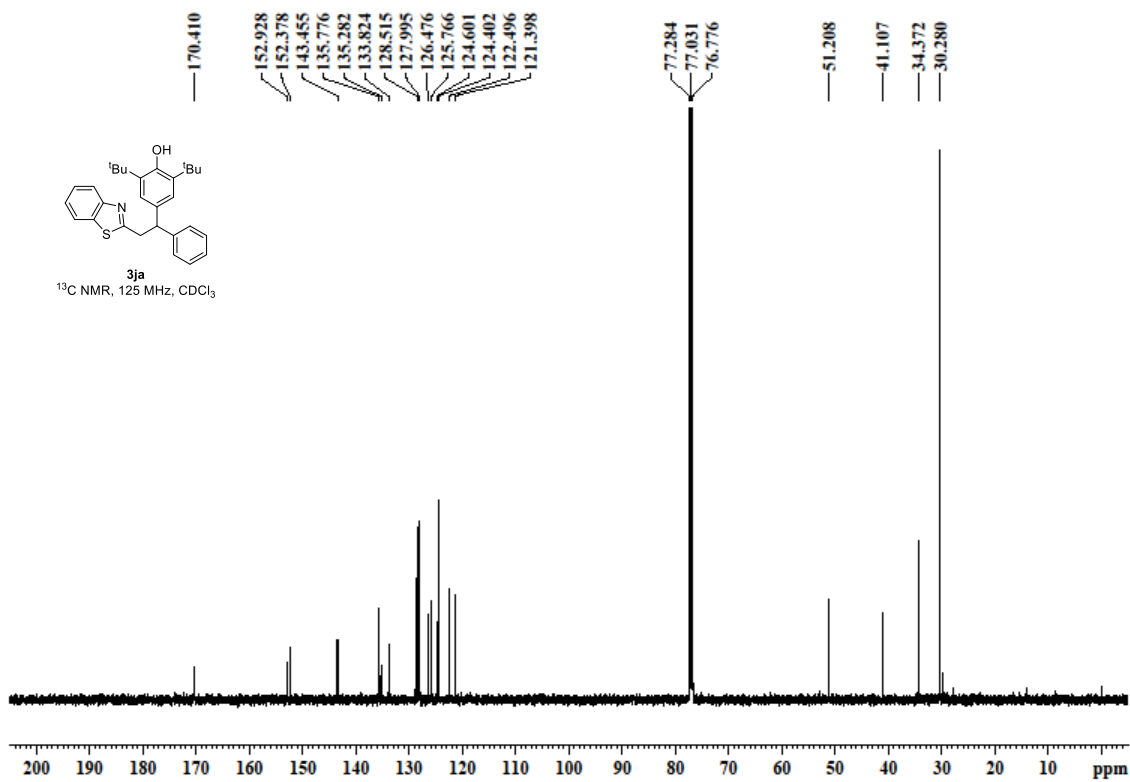

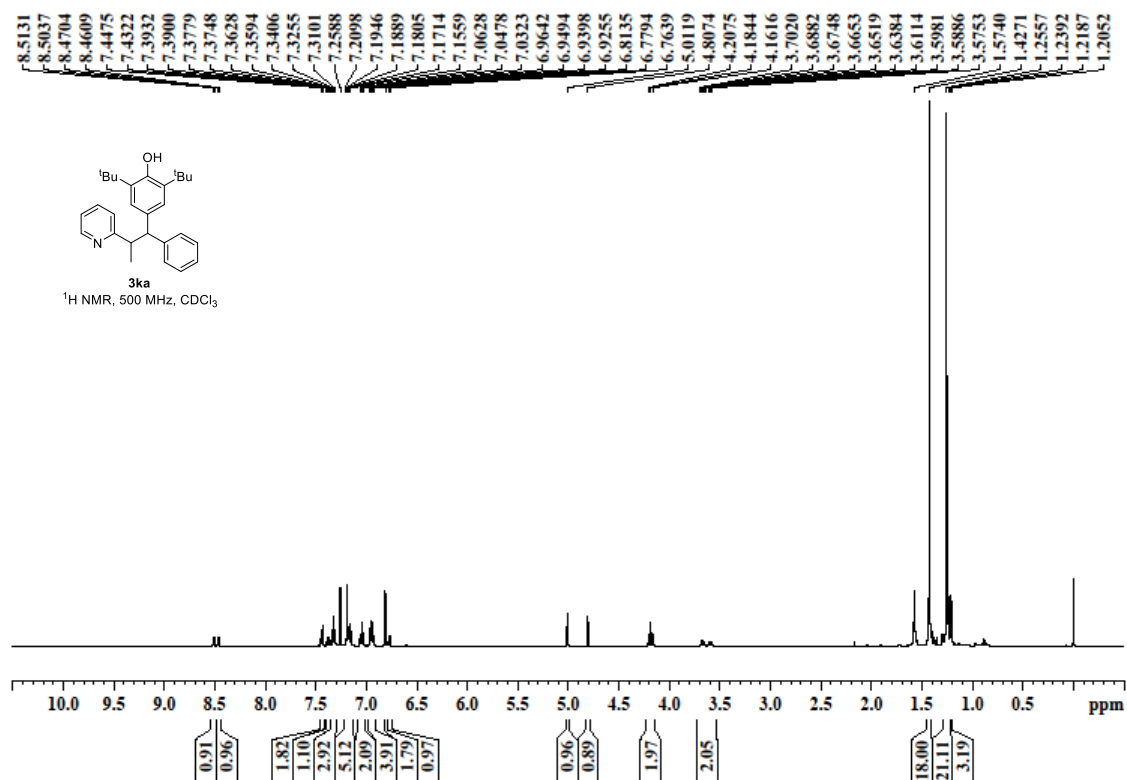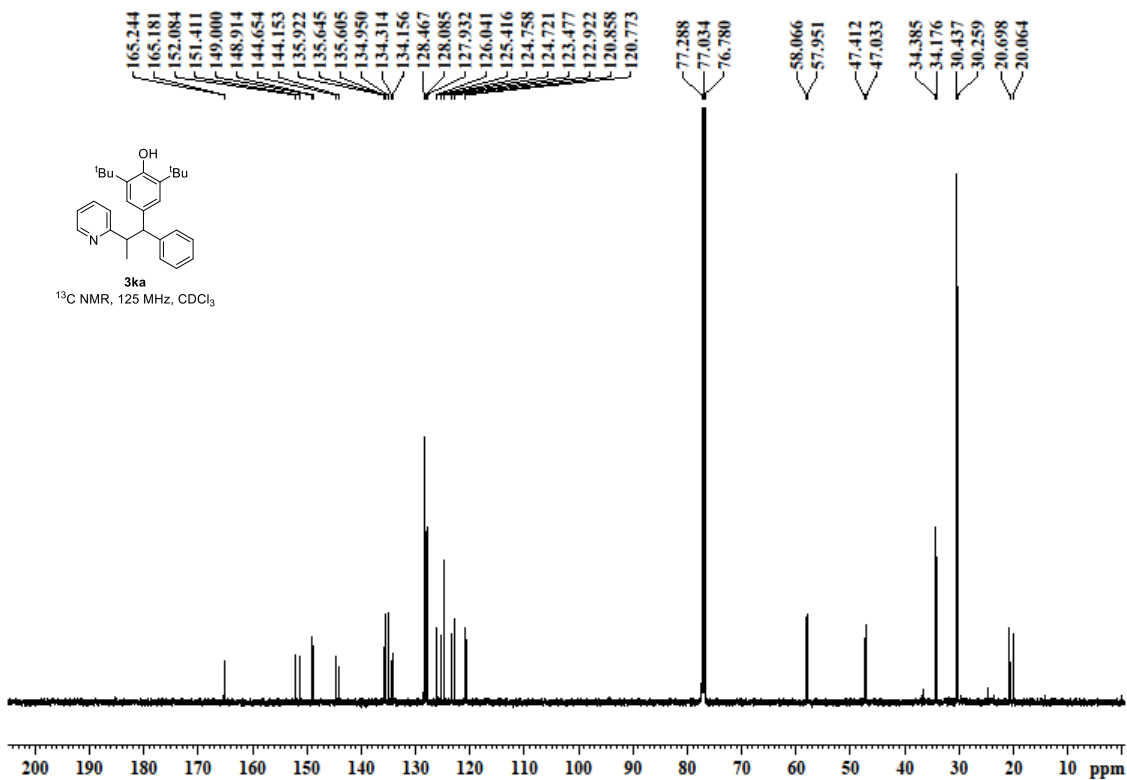

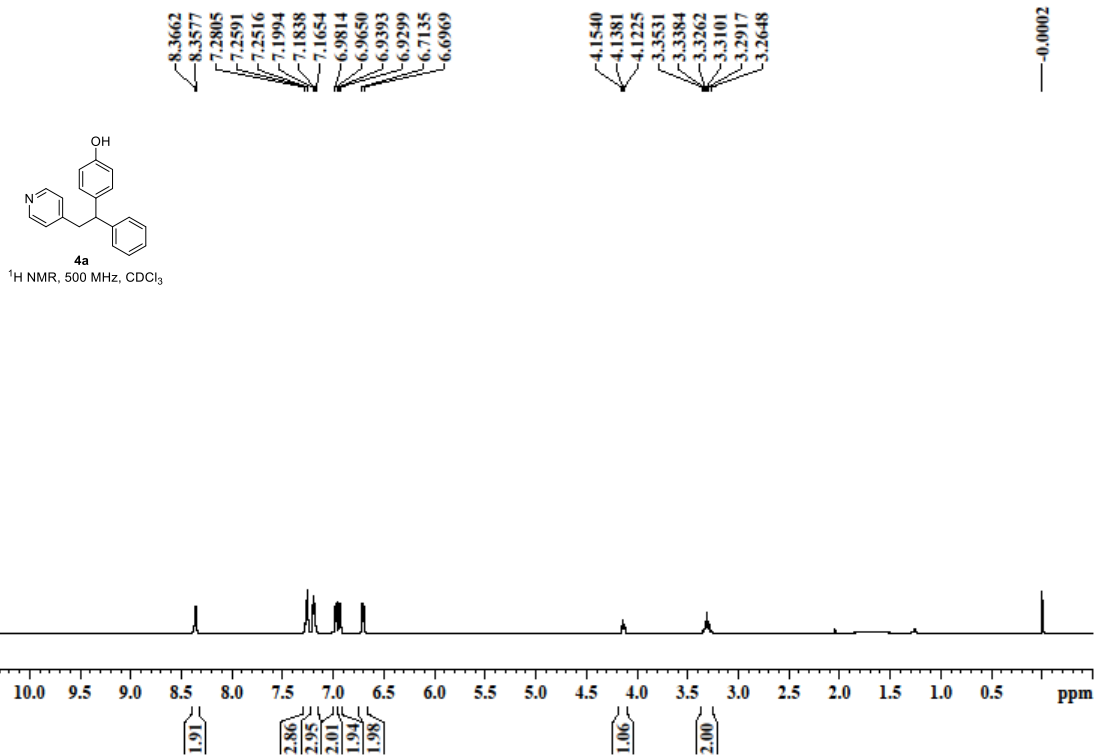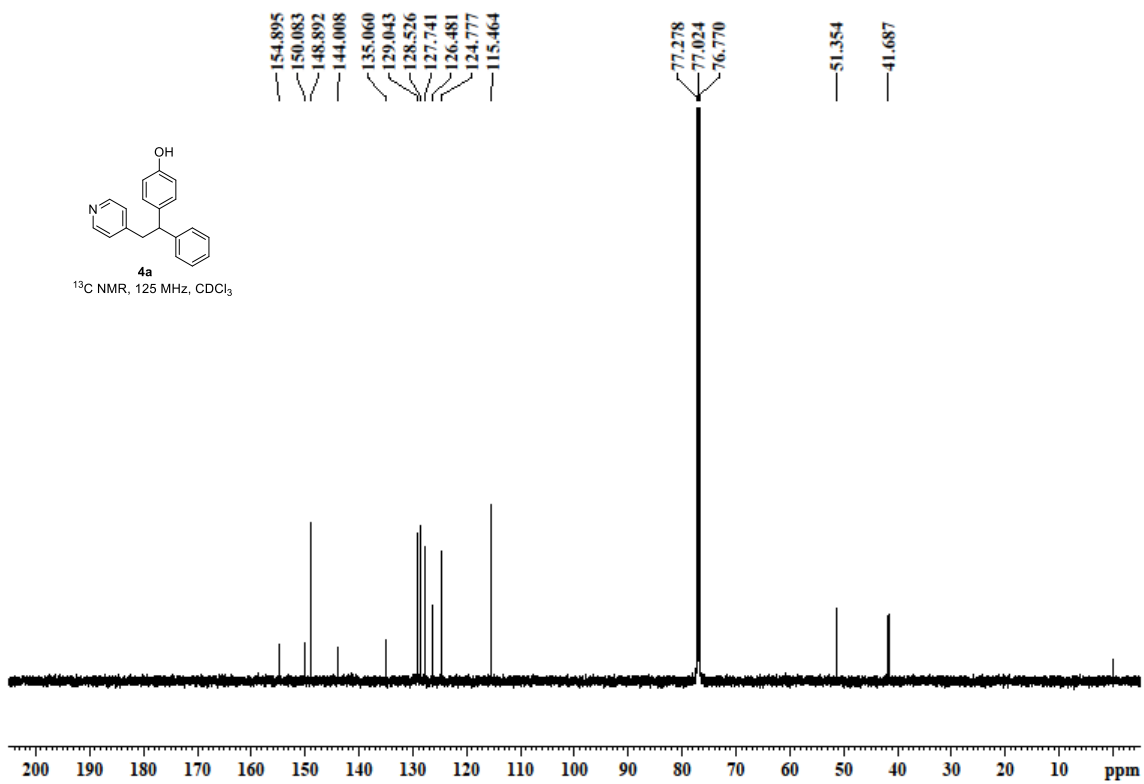

Supplement: d0ob00419g1.pdf [file d0ob00419g1.pdf]
